# Supplementary material for: Prediction of the Carcinogenic Potential of Human Pharmaceuticals Using Repeated Dose Toxicity Data and Their Pharmacological Properties
Source: PubMed Central journal article supplement (PMC5063850; doi:10.3389/fmed.2016.00045), 2016-10-14
Supplement: table_1.pdf [file table_1.pdf]

| Table S1 (Supplementary Material) Summary of the observations in the sub-chronic and carcinogenicity studies, sorted by number |                                        |                   |                   |                    |                           |                               |                |                 |
|--------------------------------------------------------------------------------------------------------------------------------|----------------------------------------|-------------------|-------------------|--------------------|---------------------------|-------------------------------|----------------|-----------------|
| A                                                                                                                              | B: Mode of Action                      | C:<br>Cat.<br>His | D:<br>Cat.<br>Ph. | E:<br>Fin.<br>cat. | Weight                    | Sub-chronic                   |                | Carcinogenicity |
|                                                                                                                                |                                        |                   |                   |                    |                           | HT                            | HP             |                 |
| 1                                                                                                                              | MB, remaining, nicotinic acid derived, | TN                | TN*               | TN                 | -                         | -                             | -              | -               |
| 2                                                                                                                              | AF, remaining, benzimidazole           | TN                | NT                | TN                 | -                         | -                             | -              | -               |
| 3                                                                                                                              | BM, bisphosphonate                     | TN                | TN                | TN                 | -                         | -                             | -              | -               |
| 4                                                                                                                              | CNS, 5-HT1b/d agonist                  | TN                | TN                | TN                 | -                         | thyr ht; li ht                | -              | -               |
| 5                                                                                                                              | CNS, Benzodiazepine                    | TN                | TN                | TN                 | -                         | -                             | -              | -               |
| 6                                                                                                                              | CVS, endothelin antagonist             | TN                | TN                | TN                 | -                         | li ht; int ht; adr ht; mam ht | nose hp; bm hp | -               |
| 7                                                                                                                              | AI, remaining,                         | TN                | TN*               | TN                 | li;                       | -                             | -              | -               |
| 8                                                                                                                              | IS, remaining                          | TN                | NC                | TN                 | -                         | -                             | -              | -               |
| 9                                                                                                                              | CVS, Calcium antagonist                | TN                | TN                | TN                 | hrt ; kid                 | adr ht                        | -              | -               |
| 10                                                                                                                             | CVS, anticoagulant                     | TN                | TN                | TN                 | -                         | -                             | -              | -               |
| 11                                                                                                                             | RS, Histamine H1 antagonist            | TN                | TN                | TN                 | -                         | -                             | -              | -               |
| 12                                                                                                                             | RS, Histamine H1 antagonist            | TN                | TN                | TN                 | li ; lu ; hrt ; kid ; tes | li ht                         | -              | -               |
| 13                                                                                                                             | CVS, Angiotensin II antagonist         | TN                | TN                | TN                 | -                         | -                             | -              | -               |
| 14                                                                                                                             | CVS, Beta antagonist                   | TN                | TN                | TN                 | -                         | -                             | -              | -               |
| 15                                                                                                                             | CVS, ACE inhibitor                     | TN                | TN                | TN                 | -                         | -                             | -              | -               |
| 16                                                                                                                             | CVS, Beta antagonist                   | TN                | TN                | TN                 | -                         | -                             | -              | -               |
| 17                                                                                                                             | CVS, Beta antagonist                   | TN                | TN                | TN                 | hrt ; li                  | -                             | -              | -               |
| 18                                                                                                                             | AV, protease inhibitor                 | TN                | NT                | TN                 | -                         | -                             | -              | -               |
| 19                                                                                                                             | CVS, Alpha1 antagonist                 | TN                | TP                | TP                 | kid ; br ; tes            | -                             | -              | -               |
| 20                                                                                                                             | CNS, remaining, DA-NA uptake inhibitor | TN                | TN*               | TN                 | li ; adr ;                | li ht                         | -              | -               |

|    |                                        |    |     |    |                                                            |        |   |   |
|----|----------------------------------------|----|-----|----|------------------------------------------------------------|--------|---|---|
|    |                                        |    |     |    | thyr                                                       |        |   |   |
| 21 | HM, GnRH agonist                       | TN | TP  | TP | -                                                          | -      | - | - |
| 22 | CNS, remaining 5HT, 5-HT1-agonist      | TN | TN* | TN | -                                                          | -      | - | - |
| 23 | CVS, Angiotensin II antagonist         | TN | TN  | TN | -                                                          | kid ht | - | - |
| 24 | CNS, antiepileptic, Na-channel blocker | TN | TN  | TN | -                                                          | li ht  | - | - |
| 25 | CVS, Beta antagonist                   | TN | TN  | TN | pit ; lu ; hrt<br>; spl ; kid ;<br>adr ; tes ;<br>ova ; br | -      | - | - |
| 26 | CVS, Beta antagonist                   | TN | TN  | TN | -                                                          | -      | - | - |
| 27 | MB, HMG-CoA reductase inhibitor        | TN | TP  | TP | -                                                          | -      | - | - |
| 28 | BM, remaining, calcium-mimetic         | TN | TN* | TN | -                                                          | -      | - | - |
| 29 | CNS, SSRI                              | TN | TN  | TN | -                                                          | -      | - | - |
| 30 | GI, remaining, Phosphate binder        | TN | TN* | TN | -                                                          | -      | - | - |
| 31 | UB, Anticholinergic                    | TN | TN  | TN | -                                                          | -      | - | - |
| 32 | GI, remaining, Fe-chelator             | TN | TN* | TN | -                                                          | -      | - | - |
| 33 | BM, bisphosphonate                     | TN | TN  | TN | -                                                          | -      | - | - |
| 34 | CVS, Alpha1 antagonist                 | TN | TP  | TP | -                                                          | -      | - | - |
| 35 | CNS, SSRI                              | TN | TN  | TN | -                                                          | -      | - | - |
| 36 | CVS, remaining, hemostatic             | TN | TN* | TN | -                                                          | -      | - | - |
| 37 | CVS, ACE inhibitor                     | TN | TN  | TN | -                                                          | -      | - | - |
| 38 | CVS, class 1C antiarrhythmic           | TN | TN  | TN | thyr ; li                                                  | -      | - | - |
| 39 | ZZ, Remaining, Prostaglandin E2        | TN | TN* | TN | -                                                          | -      | - | - |
| 40 | CVS, Angiotensin II antagonist         | TN | TN  | TN | -                                                          | -      | - | - |
| 41 | GI, Proton pump inhibitor              | TN | TP  | TP | -                                                          | -      | - | - |
| 42 | HM, progestagen-estrogen contraceptive | TN | TP  | TP | pit ; thyr                                                 | -      | - | - |
| 43 | MB, remaining, hypertriglyceridemia    | TN | TN* | TN | -                                                          | -      | - | - |
| 44 | AI, NSAID                              | TN | TN  | TN | kid                                                        | -      | - | - |
| 45 | AI, NSAID                              | TN | TN  | TN | -                                                          | -      | - | - |

|    |                                            |    |     |    |                                                      |         |   |   |
|----|--------------------------------------------|----|-----|----|------------------------------------------------------|---------|---|---|
| 46 | MB, fibrate                                | TN | TP  | TP | -                                                    | -       | - | - |
| 47 | IS, Immunosuppressive, mTOR inhibitor      | TN | TP  | TP | -                                                    | thyr ht | - | - |
| 48 | GI, Histamine H2 antagonist                | TN | TN  | TN | br ; hrt ; kid<br>; tes ; li ;<br>ova                | -       | - | - |
| 49 | CNS, antiepileptic, Na-channel blocker     | TN | TN  | TN | -                                                    | -       | - | - |
| 50 | AI, NSAID                                  | TN | TN  | TN | kid ; spl                                            | -       | - | - |
| 51 | UB, Anticholinergic                        | TN | TN  | TN | -                                                    | -       | - | - |
| 52 | IS, Immunosuppressive, S1P antagonist      | TN | TP  | TP | -                                                    | -       | - | - |
| 53 | CVS, class 1C antiarrhythmic               | TN | TN  | TN | hrt ; li                                             | -       | - | - |
| 54 | CNS, SSRI                                  | TN | TN  | TN | -                                                    | -       | - | - |
| 55 | AV, viral DNA polymerase inhibitor         | TN | NT  | TN | -                                                    | -       | - | - |
| 56 | CNS, remaining, acetylcholinesterase inhib | TN | TN* | TN | -                                                    | sgl ht  | - | - |
| 57 | MB, remaining, lipid replacement           | TN | TN* | TN | -                                                    | -       | - | - |
| 58 | MB, Antidiabetic, remaining, SU derivative | TN | TN* | TN | -                                                    | -       | - | - |
| 59 | CNS, DA2-antagonist/5HT antagonist         | TN | TP  | TP | -                                                    | -       | - | - |
| 60 | AV, immunostimulant                        | TN | NT  | TN | li ; kid ; adr                                       | -       | - | - |
| 61 | RS, Anticholinergic                        | TN | TN  | TN | -                                                    | -       | - | - |
| 62 | ZZ, remaining, CFTR potentiator            | TN | TN* | TN | -                                                    | -       | - | - |
| 63 | CVS, remaining, 5-HT2 antagonist           | TN | TN* | TN | spl ; li ; kid ;<br>hrt ; pan ;<br>br ; thy ;<br>adr | -       | - | - |
| 64 | AI, NSAID                                  | TN | TN  | TN | -                                                    | -       | - | - |
| 65 | CNS, antiepileptic, Na-channel blocker     | TN | TN  | TN | -                                                    | li ht   | - | - |
| 66 | CNS, antiepileptic, Na-channel blocker     | TN | TN  | TN | -                                                    | li ht   | - | - |
| 67 | RS, HistamineH1 antagonist                 | TN | TN  | TN | -                                                    | li ht   | - | - |

|    |                                          |    |     |    |                                       |                |   |   |
|----|------------------------------------------|----|-----|----|---------------------------------------|----------------|---|---|
| 68 | MB, antidiabetic, DPP4 inhibitor         | TN | TN  | TN | -                                     | thyr ht; li ht |   | - |
| 69 | CVS, ACE inhibitor                       | TN | TN  | TN | -                                     | -              | - | - |
| 70 | GI, remaining, Opioid, mu-agonist        | TN | TN* | TN | -                                     | -              | - | - |
| 71 | AI, NSAID,                               | TN | TN  | TN | -                                     | -              | - | - |
| 72 | AI, COX2-inhibitor                       | TN | TN  | TN | -                                     | -              | - | - |
| 73 | AM, remaining, antimalarial              | TN | NT  | TN | -                                     | -              | - | - |
| 74 | AI, NSAID                                | TN | TN  | TN | -                                     | -              | - | - |
| 75 | CNS, Opioid, remaining, kappa agonist    | TN | TN* | TN | -                                     | -              | - | - |
| 76 | MB, antidiabetic, alfa-glucosidase inhib | TN | TN  | TN | -                                     | -              | - | - |
| 77 | CVS, PDE3 inhibitor                      | TN | TN  | TN | adr                                   | -              | - | - |
| 78 | CVS, remaining, vasodilator              | TN | TN* | TN | -                                     | hrt ht         | - | - |
| 79 | UB, remaining, oral Beta 3 agonist       | TN | TN* | TN | -                                     | li ht          | - | - |
| 80 | GI, remaining, Synthetisch prostaglandin | TN | TN* | TN | adr ; li                              | -              | - | - |
| 81 | CNS, remaining, MAO-A inhibitor          | TN | TN* | TN | lu ; kid ; thyr ; tes ; ova           | -              | - | - |
| 82 | RS, remaining, Leukotriene receptor a    | TN | TN  | TN | -                                     | -              | - | - |
| 83 | AI, NSAID                                | TN | TN  | TN | li ; kid                              | -              | - | - |
| 84 | CNS, Opioid, mu-agonist                  | TN | TN  | TN | -                                     | -              | - | - |
| 85 | CNS, Opioid, mu-antagonist               | TN | TN  | TN | -                                     | -              | - | - |
| 86 | CNS, Opioid, mu-antagonist               | TN | TN  | TN | -                                     | -              | - | - |
| 87 | BM, Bisphosphonate,                      | TN | TN  | TN | thyr ; parath                         | bo ht          | - | - |
| 88 | CNS, SSRI, 5-HT antagonist               | TN | TN  | TN | -                                     | -              | - | - |
| 89 | CVS, remaining, Nitr/K+ATP agonist       | TN | TN* | TN | -                                     | -              | - | - |
| 90 | CVS, Calcium antagonist                  | TN | TN  | TN | spl ; kid ; ova ; hrt ; li ; adr ; br | -              | - | - |

|     |                                                |    |     |    |                    |                   |   |   |
|-----|------------------------------------------------|----|-----|----|--------------------|-------------------|---|---|
| 91  | AI, NSAID                                      | TN | TN  | TN | hrt ; adr ;<br>kid | -                 | - | - |
| 92  | CVS, Calcium antagonist                        | TN | TN  | TN | -                  | -                 | - | - |
| 93  | CVS, Calcium antagonist                        | TN | TN  | TN | -                  | -                 | - | - |
| 94  | GI, Histamine H2 antagonist                    | TN | TN  | TN | li ; kid           | -                 | - | - |
| 95  | CNS, 5-HT3 antagonist                          | TN | TN  | TN | -                  | -                 | - | - |
| 96  | CNS, remaining, AMPA Glutamate antagonist      | TN | TN* | TN | -                  | -                 | - | - |
| 97  | AM, remaining, Antiparasite.                   | TN | NT  | TN | -                  | -                 | - | - |
| 98  | CVS, Loop diuretic                             | TN | NC  | TN | -                  | -                 | - | - |
| 99  | CVS, platelet aggregation inhibito             | TN | NC  | TN | -                  | li ht; thyr<br>ht | - | - |
| 100 | CVS, Na-channel block                          | TN | TN  | TN | -                  | -                 | - | - |
| 101 | CVS, Na-channel block                          | TN | TN  | TN | -                  | li ht             | - | - |
| 102 | CNS, remaining, MAO-B inhibitor                | TN | TN* | TN | -                  | li ht             | - | - |
| 103 | CNS, SNRI                                      | TN | TN  | TN | -                  | -                 | - | - |
| 104 | AV, Nucleoside inhibitor                       | TN | NT  | TN | -                  | -                 | - | - |
| 105 | CVS, Imidazoline agonist                       | TN | TN  | TN | adr ; tes          | -                 | - | - |
| 106 | CNS, remaining, cannabinoid antagonist         | TN | TN* | TN | -                  | -                 | - | - |
| 107 | CNS, 5-HT1b/d agonist,                         | TN | TN  | TN | -                  | -                 | - | - |
| 108 | AI, COX2 inhibitor                             | TN | TN  | TN | -                  | -                 | - | - |
| 109 | ZZ, remaining, protein kinase C-beta inhibitor | TN | TN* | TN | -                  | -                 | - | - |
| 110 | CVS, vasopressin-2 agonist                     | TN | TN  | TN | -                  | -                 | - | - |
| 111 | MB, antidiabetic, DPP4 inhibitor               | TN | TN  | TN | -                  | -                 | - | - |
| 112 | CNS, SSRI                                      | TN | TN  | TN | kid                | li ht             | - | - |
| 113 | CVS, remaining, PDE5-inhibitor                 | TN | TN* | TN | -                  | li ht; thyr<br>ht | - | - |
| 114 | MB, antidiabetic, DPP4 inhibitor               | TN | TN  | TN | -                  | -                 | - | - |
| 115 | CVS, endothelin antagonist                     | TN | TN  | TN | -                  | -                 | - | - |

|     |                                          |    |     |    |                       |        |   |   |
|-----|------------------------------------------|----|-----|----|-----------------------|--------|---|---|
| 116 | RS, remaining, Mest cell stabilisor      | TN | TN  | TN | -                     | -      | - | - |
| 117 | CVS, ACE inhibitor                       | TN | TN  | TN | kid                   | kid ht | - | - |
| 118 | CNS, remaining, GABA-enhancer            | TN | TN* | TN | -                     | -      | - | - |
| 119 | GI, remaining, anti-osteoporose agent    | TN | TN* | TN | -                     | -      | - | - |
| 120 | IS, Immunosuppressive                    | TN | TP  | TP | -                     | -      | - | - |
| 121 | GI, 5HT4-agonist                         | TN | TN  | TN | -                     | -      | - | - |
| 122 | AI, remaining, cytokine-modulat          | TN | TN* | TN | -                     | -      | - | - |
| 123 | AV,                                      | TN | NT  | TN | -                     | -      | - | - |
| 124 | AI, NSAID                                | TN | TN  | TN | -                     | -      | - | - |
| 125 | UB, Anticholinergic and calcium antagoni | TN | TN  | TN | thyr ; adr ; ova ; li | -      | - | - |
| 126 | CVS, Beta antagonist                     | TN | TN  | TN | -                     | -      | - | - |
| 127 | CVS, Beta antagonist                     | TN | TN  | TN | -                     | -      | - | - |
| 128 | RS, Anticholinergic                      | TN | TN  | TN | -                     | -      | - | - |
| 129 | AI, NSAID                                | TN | TN  | TN | -                     | -      | - | - |
| 130 | MB, remaining, Aldose reductase inhibit  | TN | TN* | TN | -                     | -      | - | - |
| 131 | CVS, vasopressin-2 agonist               | TN | TN  | TN | -                     | -      | - | - |
| 132 | CNS, Opioid, mu-agonist, anticholinergic | TN | TN  | TN | -                     | -      | - | - |
| 133 | CVS, Alpha1 antagonist                   | TN | TP  | TP | -                     | -      | - | - |
| 134 | MB, antidiabetic, remaining, PPAR-gamma  | TN | TP* | TP | hrt ; li              | li ht  | - | - |
| 135 | AV, herpes genitalis                     | TN | NT  | TN | -                     | -      | - | - |
| 136 | CNS, Remaining, Nicotine agonist         | TN | TN* | TN | -                     | -      | - | - |
| 137 | CNS, SNRI                                | TN | TN  | TN | -                     | -      | - | - |
| 138 | CNS, remaining, GABA-metab. inhib        | TN | TN* | TN | -                     | -      | - | - |
| 139 | MB, antidiabetic, DPP4 inhibitor         | TN | TN  | TN | -                     | -      | - | - |
| 140 | IS, Immunosuppressive                    | TN | TP  | TP | -                     | -      | - | - |
| 141 | CVS, remaining, B1 partial agonist       | TN | TN* | TN | -                     | -      | - | - |

|     |                                               |    |     |    |                                        |                     |                               |                                          |
|-----|-----------------------------------------------|----|-----|----|----------------------------------------|---------------------|-------------------------------|------------------------------------------|
| 142 | CNS, benzodiazepine-like hypnotic             | TN | TN  | TN | -                                      | -                   | -                             | -                                        |
| 143 | CNS, benzodiazepine-like hypnotic             | TN | TN  | TN | spl ; li ; kid ;<br>tes ; hrt ;<br>pit | li ht               | -                             | -                                        |
| 144 | CVS, Alpha1 antagonist                        | FP | TP  | TP | -                                      | -                   | mam hp                        | -                                        |
| 145 | CVS, Alpha2 agonist                           | FP | TN  | TN | -                                      | -                   | thy hp                        | -                                        |
| 146 | MB, HMG-CoA reductase inhibitor               | FP | TP  | TP | -                                      | -                   | li hp                         | -                                        |
| 147 | CVS, Beta antagonist                          | FP | TN  | TN | -                                      | adr ht              | thyr hp                       | -                                        |
| 148 | CVS, Beta antagonist /alpha-1 blocker         | FP | TN  | TN | li                                     | -                   | li hp                         | -                                        |
| 149 | CVS, Alpha2 agonist                           | FP | TN  | TN | -                                      | -                   | islet hp                      | -                                        |
| 150 | IS, Immunosuppressive                         | FP | TP  | TP | -                                      | -                   | ln hp                         | -                                        |
| 151 | MB, Antidiabetic, remaining, SGLT-2 inhibitor | FP | TN* | TN | -                                      | kid ht              | kid hp                        | -                                        |
| 152 | IS, Immunosuppressive, mTOR inhibitor         | FP | TP  | TP | -                                      | stom ht;<br>thyr ht | stom hp                       | -                                        |
| 153 | UB, remaining xanthine oxidase inhibito       | FP | TN* | TN | -                                      | -                   | thyr hp                       | -                                        |
| 154 | RS, Histamine H1 antagonist                   | FP | TN  | TN | -                                      | -                   | mam hp                        | -                                        |
| 155 | RS, Histamine H1 antagonist                   | FP | TN  | TN | li                                     | li ht               | pan hp                        | -                                        |
| 156 | CVS, Angiotensin II antagonist                | FP | TN  | TN | -                                      | -                   | kid hp                        | -                                        |
| 157 | CNS, SSRI                                     | FP | TN  | TN | -                                      | li ht               | li hp                         | -                                        |
| 158 | AB, remaining, bactericidal                   | FP | NT  | FP | li ; spl ; kid ;<br>thyr               | -                   | stom hp;<br>ut hp;<br>stom hp | -                                        |
| 159 | CVS, Alpha1 agonist                           | FP | TN  | TN | -                                      | -                   | mam hp                        | -                                        |
| 160 | MB, remaining, 3 beta-hydroxysteroid de       | FP | TN* | TN | -                                      | adr ht              | adr hp                        | -                                        |
| 161 | CVS, Alpha1 antagonist and 5-HT1A             | FP | TN  | TP | -                                      | -                   | bm hp                         | -                                        |
| 162 | CVS, Angiotensin II antagonist                | FP | TN  | TN | -                                      | kid ht              | kid hp                        | -                                        |
| 163 | CNS, DA2-antagonist, Benzamide,               | TP | TP  | TP | -                                      | -                   | mam hp                        | pan ad; pan ac; adr bpha; mam ca; pit ca |

|     |                                       |    |     |    |                                             |                                      |                   |                                                                 |
|-----|---------------------------------------|----|-----|----|---------------------------------------------|--------------------------------------|-------------------|-----------------------------------------------------------------|
| 164 | AI, NSAID                             | TP | TN  | TN | -                                           | -                                    | kid hp;<br>UGT hp | adr bpha                                                        |
| 165 | CVS, Calcium antagonist               | TP | TN  | TN | li                                          | li ht                                | ln hp;<br>thyr hp | thyr ad                                                         |
| 166 | HM, remaining, antiandrogen,          | TP | TP  | TP | tes ; adr                                   | li ht; ova<br>ht; adr ht;<br>thyr ht | tes hp;<br>ova hp | te ad; thyr ad; ut ac                                           |
| 167 | CVS, Alpha2 agonist, indicatie ocular | TP | TN  | TN | -                                           | int ht                               | int hp            | pan ac; thyr ad; mam ad                                         |
| 168 | RS, Corticosteroid                    | TP | TP  | TP | -                                           | -                                    | mam hp            | mam fad; li ac; br astr; li ad                                  |
| 169 | CVS, remaining, Hydrazinophthalzine   | TP | TP* | TP | -                                           | pit ht                               | thyr hp;          | thyr ad; thyr ac                                                |
| 170 | RS, Corticosteroid                    | TP | TP  | TP | many; tes ;<br>br ; hrt ; kid<br>; pit ; li | li ht                                | pan hp; ln<br>hp  | pan ad; pan ac; bo most; li ad; li ac; li<br>ac; mam ad; mam ac |
| 171 | AV, Guanosine analogue                | TP | NT  | TP | -                                           | pit ht                               | tes hp            | mam ac; skin sar                                                |
| 172 | CVS, Calcium antagonist               | TP | TN  | TN | -                                           | -                                    | col hp            | mam fad; adr bpha; tes ad; pit ad;<br>mam ac; pit ca            |
| 173 | MB, HMG-CoA-reductase inhibitor       | TP | TP  | TP | thyr                                        | -                                    | stom hp           | stom SCP; thyr ac; thyr ad                                      |
| 174 | CVS, ACE inhibitor                    | TP | TN  | TN | thyr                                        | -                                    | kid hp            | pit ad; br ac; mes lip; pit ac                                  |
| 175 | HM, GnRH agonist                      | TP | TP  | TP | -                                           | -                                    | tes hp            | pit ad                                                          |
| 176 | CNS, 5-HT3 antagonist                 | TP | TN  | TN | -                                           | -                                    | -                 | li ad; li ac                                                    |
| 177 | CNS, remaining, Electron transporter  | TP | TP* | TP | -                                           | -                                    | stom hp           | Squamous cell and basal carcinomas                              |
| 178 | GI, Proton pump inhibitor             | TP | TP  | TP | li ; li ; lu ;<br>stom                      | li ht; stom<br>ht; stom<br>ht        | stom hp           | tes ad; tes ad                                                  |
| 179 | HM, selective estrogen modulator      | TP | TP  | TP | -                                           | -                                    | ova hp            | kid ac; ova ad                                                  |
| 180 | HM, GnRH agonist                      | TP | TP  | TP | br                                          | pit ht                               | pit hp            | pit ad                                                          |
| 181 | CNS, 5-HT1b/d agonist,                | TP | TN  | TN | kid                                         | -                                    | epi hp;<br>tes hp | thyr ad; pit ad; thy bthym                                      |
| 182 | AF, conazole derivative               | TP | NT  | TP | li ; kid ; spl ;<br>br ; ova ;<br>thyr      | -                                    | thyr hp           | tes tu; br astr; skin mel; mam ac                               |



|     |                                                   |    |     |    |                                          |                            |                   |                                                            |
|-----|---------------------------------------------------|----|-----|----|------------------------------------------|----------------------------|-------------------|------------------------------------------------------------|
| 183 | CNS, antiepileptic, Na-channel blocker            | TP | TN  | TN | kid ; adr                                | li ht                      | kid hp            | li ac                                                      |
| 184 | RS, remaining, antifibrotic                       | TP | NC  | TN | -                                        | adr ht                     | adr hp            | li ad; ut ac                                               |
| 185 | CNS, 5-HT2 antagonist                             | TP | NC  | TP | li                                       | thyr ht;<br>mam ht         | mam hp            | thyr ad; mam ac                                            |
| 186 | CVS, ACE inhibitor                                | TP | TN  | TN | -                                        | kid ht                     | kid hp            | In bhaem                                                   |
| 187 | GI, Proton pump inhibitor                         | TP | TP  | TP | li ; kid ;<br>stom ; thyr<br>; hrt ; spl | li ht; stom<br>ht; thyr ht | stom hp           | adr bpha; tes ad; stom SCP; stom SCC;<br>hsyst leu; pit ad |
| 188 | CNS, DA2-antagonist, DA3 antagonist               | TP | TP  | TP | li                                       | -                          | lu hp             | mam ca                                                     |
| 189 | AV, protease inhibitor                            | TP | NT  | TP | -                                        | thyr ht                    | li hp; kid<br>hp  | adr bpha                                                   |
| 190 | MB, HMG-CoA reductase inhibitor                   | TP | TP  | TP | -                                        | li ht                      | li hp;<br>stom hp | ut polyp                                                   |
| 191 | RS, Beta2 agonist                                 | TP | TP  | TP | -                                        | -                          | nose hp           | ova leio; pit ad                                           |
| 192 | CVS, Alpha1 antagonist                            | TP | TP  | TP | -                                        | li ht; vag<br>ht           | li hp;<br>mam hp  | thyr ad; thyr ac                                           |
| 193 | CVS, Alpha1 antagonist                            | TP | TP  | TP | -                                        | -                          | mam hp            | mam ad; hsyst leu                                          |
| 194 | MB, antidiabetic, alfa-glucosidase inhib          | FN | TN  | TN | -                                        | -                          | -                 | tes ad; kid ad; kid ac;                                    |
| 195 | RS, Histamine H1 antagonist                       | FN | TN  | TN | li ; kid                                 | -                          | -                 | adr bpha                                                   |
| 196 | ZZ, Remaining, retinoid, topical,<br>keratinocyte | FN | TN* | TN | pit ; adr                                | -                          | -                 | adr bpha; thyr ad                                          |
| 197 | CNS, remaining, melatonin receptor<br>agonist     | FN | TN* | TN | -                                        | -                          | -                 | li ad; li ac                                               |
| 198 | CVS, remaining, renin inhibitor                   | FN | TN* | TN | -                                        | col ht                     | -                 | col ad; col ac                                             |
| 199 | RS, Beta2-agonist                                 | FN | TP  | TP | li                                       | -                          | -                 | thyr ad                                                    |
| 200 | CVS, Calcium antagonist                           | FN | TN  | TN | -                                        | -                          | -                 | ut polyp                                                   |
| 201 | HM, selective estrogen modulator                  | FN | TP  | TP | -                                        | -                          | -                 | kid ad; kid ac; ova ad                                     |
| 202 | MB, fibrate                                       | FN | TP  | TP | -                                        | -                          | -                 | tes tu; adr bpha; li ac                                    |
| 203 | CVS, Beta antagonist                              | FN | TN  | TN | tes ; adr ; li                           | -                          | -                 | pit tu                                                     |
| 204 | CNS, Benzodiazepine                               | FN | TN  | TN | -                                        | -                          | -                 | thyr ad; thy lymph; ut schwan                              |

|     |                                              |    |     |    |                                          |                   |   |                                                   |
|-----|----------------------------------------------|----|-----|----|------------------------------------------|-------------------|---|---------------------------------------------------|
| 205 | CNS, Opioid, mu-agonist                      | FN | TN  | TN | -                                        | -                 | - | tes tu; hsyst leu                                 |
| 206 | AI, COX2-inhibitor                           | FN | TN  | TN | li                                       | -                 | - | li ac                                             |
| 207 | RS, Histamine H1 antagonist                  | FN | TN  | TN | -                                        | li ht             | - | thyr ad; pit ac; li ac                            |
| 208 | CVS, ACE inhibitor                           | FN | TN  | TN | kid ; li                                 | kid ht            | - | tes tu                                            |
| 209 | CVS, PDE3 inhibitor                          | FN | TN  | TN | li ; kid                                 | -                 | - | adr bpha                                          |
| 210 | GI, Histamine H2 antagonist                  | FN | TN  | TN | li                                       | -                 | - | tes ad                                            |
| 211 | MB, fibrate                                  | FN | TP  | TP | li ; kid ; hrt ;<br>adr ; tes            | -                 | - | pan ad; stom tu; li ad; li ac                     |
| 212 | GI, 5HT4 agonist                             | FN | TN  | TN | -                                        | -                 | - | tes tu; pit ad                                    |
| 213 | CNS, remaining, Carbonic anhydrase inhibitor | FN | TP* | TP | -                                        | -                 | - | UGT pap                                           |
| 214 | HM, progesterone antagonist, birth cont      | FN | TP  | TP | li                                       | -                 | - | li ad; ut ac; mam ac                              |
| 215 | HM, Dual 5 reductase inhibitor.              | FN | TP  | TP | -                                        | -                 | - | tes ad                                            |
| 216 | CVS, remaining, imidazole, PDE-inh           | FN | TN* | TN | -                                        | -                 | - | adr bpha                                          |
| 217 | CNS, remaining, COMT-inhibitor               | FN | NC  | FN | adr                                      | -                 | - | kid ad; kid ac                                    |
| 218 | AV, hepatitis B-inhibitor                    | FN | NT  | FN | -                                        | -                 | - | pan ad; pan ac; li ad; li ac; Zymgl ca;<br>br gli |
| 219 | CVS, Beta antagonist                         | FN | TN  | TN | kid                                      | -                 | - | skin SCP                                          |
| 220 | CNS, 5HT2 antagonist                         | FN | NC  | FN | -                                        | -                 | - | li ad                                             |
| 221 | HM, estrogen agonist                         | FN | TP  | TP | -                                        | -                 | - | pit ad                                            |
| 222 | AI, COX2-inhibitor                           | FN | TN  | TN | -                                        | li ht; thyr<br>ht | - | thyr ad; li ad                                    |
| 223 | CNS, remaining, NMDA-antagonist              | FN | TN* | TN | -                                        | -                 | - | tes ad                                            |
| 224 | HM, Dual 5-reductase inhibitor               | FN | TP  | TP | -                                        | -                 | - | thyr ad                                           |
| 225 | CVS, remaining, Quinolone vasodila           | FN | TN* | TN | li ; thyr ;<br>adr ; spl ;<br>pros ; tes | -                 | - | adr bpha                                          |
| 226 | AF, conazole derivative                      | FN | NT  | FN | li                                       | li ht             | - | li ad                                             |
| 227 | RS, Corticosteroid                           | FN | TP  | TP | -                                        | -                 | - | islet tu; adr bpha; skin sar                      |

|     |                                           |    |     |    |                                                                          |         |   |                                    |
|-----|-------------------------------------------|----|-----|----|--------------------------------------------------------------------------|---------|---|------------------------------------|
| 228 | RS, Beta2 agonist                         | FN | TP  | TP | -                                                                        | pan ht  | - | thyr ad; thyr ac; ova leio; mam ac |
| 229 | CVS, Loop diuretic                        | FN | NC  | FN | -                                                                        | -       | - | thyr ad; pit ad                    |
| 230 | CNS, remaining, alpha2-delta agonist      | FN | NC  | FN | -                                                                        | -       | - | pan ac; pan ad; tes ad; ut polyp   |
| 231 | AB, Fluoroquinolone                       | FN | NT  | FN | col ; kid                                                                | -       | - | hsyst leu                          |
| 232 | CVS, remaining, D1/alpha agonist          | FN | TN* | TN | adr ; kid                                                                | -       | - | pan ad                             |
| 233 | CVS, ACE-inhibitor                        | FN | TN  | TN | kid                                                                      | -       | - | thyr ad; ut polyp                  |
| 234 | BM, remaining, Isoflavone                 | FN | TN* | TN | -                                                                        | -       | - | pit ad; li ad                      |
| 235 | CVS, Calcium antagonist                   | FN | TN  | TN | -                                                                        | -       | - | tes ad                             |
| 236 | AF, conazole derivative                   | FN | NT  | FN | adr ; li ; hrt<br>; kid ; thy ;<br>lu ; spl ;<br>pan ; br ;<br>gon ; ova | adr ht  | - | soft t sar                         |
| 237 | CVS, Calcium antagonist                   | FN | TN  | TN | ova                                                                      | -       | - | tes ad                             |
| 238 | GI, remaining, Sugar alcohol              | FN | TN* | TN | -                                                                        | li ht   | - | tes tu                             |
| 239 | CNS, antiepileptic, Na-channel blocker    | FN | TN  | TN | adr ; pit ;<br>kid ; li                                                  | -       | - | adr bpha                           |
| 240 | CVS, Calcium antagonist                   | FN | TN  | TN | -                                                                        | adr ht  | - | mam fad; pit ad                    |
| 241 | HM, remaining, aromatase inhibitor        | FN | TP  | TP | -                                                                        | li ht   | - | ova gca; UGT pap                   |
| 242 | IS, remaining, imidazothiazole derivative | FN | NC  | FN | -                                                                        | -       | - | pit ad                             |
| 243 | CVS, Beta antagonist                      | FN | TN  | TN | thyr ; li ;<br>adr ; kid                                                 | -       | - | li ad                              |
| 244 | AB, Fluoroquinolone                       | FN | NT  | FN | -                                                                        | -       | - | pan tu                             |
| 245 | CNS, DA2 agonist                          | FN | TP  | TP | -                                                                        | -       | - | tes ad; tes ca                     |
| 246 | AV, CCR5 receptor antagonist              | FN | NT  | FN | -                                                                        | thyr ht | - | thyr ad                            |
| 247 | CVS, Calcium antagonist.                  | FN | TN  | TN | li ; hrt                                                                 | -       | - | ut polyp; oral SCC                 |
| 248 | CNS, benzodiazepine                       | FN | TN  | TN | -                                                                        | li ht   | - | thyr ad                            |
| 249 | CVS, Alpha1 agonist                       | FN | TN  | TN | -                                                                        | -       | - | tes ad                             |
| 250 | CNS, SNRI                                 | FN | TN  | TN | -                                                                        | li ht   | - | thyr ad                            |

|     |                                         |    |     |    |                                 |                |   |                                                      |
|-----|-----------------------------------------|----|-----|----|---------------------------------|----------------|---|------------------------------------------------------|
| 251 | CNS, remaining, antidepressant          | FN | NC  | FN | -                               | li ht; thyr ht | - | thyr ac; mam ca; li ad; li ac                        |
| 252 | CVS, Imidazoline agonist                | FN | TN  | TN | -                               | -              | - | adr tu                                               |
| 253 | CVS, Loop diuretic                      | FN | NC  | FN | -                               | -              | - | tes ad; ut ac                                        |
| 254 | HM, GnRH agonist                        | FN | TP  | TP | -                               | -              | - | adr bpha; adr mpha; islet ad; tes ad; pit ad; pit ca |
| 255 | CVS, Beta antagonist,                   | FN | TN  | TN | -                               | -              | - | spl bhaem                                            |
| 256 | CVS, Calcium antagonist                 | FN | TN  | TN | -                               | -              | - | thyr ad; thyr ac                                     |
| 257 | HM, progestagen-estrogen contraceptive. | FN | TP  | TP | adr ; li                        | -              | - | pit ad; mam ad; mam ac                               |
| 258 | MB, remaining, Inhib.growth hormone     | FN | TP* | TP | -                               | -              | - | sk sar; ut ac                                        |
| 259 | GI, Proton pump inhibitor               | FN | TP  | TP | -                               | stom ht        | - | stom tu; stom SCC; li ad                             |
| 260 | AI, NSAID                               | FN | TN  | TN | -                               | -              | - | tes ad;                                              |
| 261 | CNS, remaining, nootropic drug          | FN | TN* | TN | -                               | -              | - | adr bpha                                             |
| 262 | CNS, SSRI                               | FN | TN  | TN | li                              | -              | - | ln lymph                                             |
| 263 | AB, Fluoroquinolone                     | FN | NT  | FN | ce ; hrt ; li ; spl ; adr ; ova | -              | - | kid ac                                               |
| 264 | RS, remaining, Methylxanthine-derivate  | FN | TN  | TN | li                              | -              | - | tes tu; mam fad                                      |
| 265 | CNS, DA2 agonist                        | FN | TP  | TP | -                               | -              | - | pit ad; ut ac                                        |
| 266 | CVS, ACE inhibitor                      | FN | TN  | TN | -                               | -              | - | thyr ac                                              |
| 267 | MB, HMG-CoA-reductase inhibitor         | FN | TP  | TP | -                               | -              | - | thyr ad; li ac                                       |
| 268 | UB, Anticholinergic                     | FN | TN  | TN | -                               | li ht          | - | ut polyp; kid pap                                    |
| 269 | GI, 5HT4-agonist                        | FN | TN  | TN | -                               | -              | - | thyr ad; mam fad; pan ad; adr bpha; li ad; pit ad    |
| 270 | CNS, DA2 agonist                        | FN | TP  | TP | -                               | -              | - | tes ad                                               |
| 271 | CVS, ACE inhibitor                      | FN | TN  | TN | -                               | -              | - | kid ad                                               |
| 272 | CVS, Na-channel block                   | FN | TN  | TN | -                               | li ht          | - | thyr ad; tes ad; adr bpha; adr bpha                  |
| 273 | CNS, DA2-antagonist                     | FN | TP  | TP | -                               | -              | - | islet ad; mam ac; pit ad                             |
| 274 | CNS, DA2 agonist                        | FN | TP  | TP | adr                             | li ht          | - | tes ad; skin fibr                                    |

|     |                                      |    |    |    |                       |        |   |                                                    |
|-----|--------------------------------------|----|----|----|-----------------------|--------|---|----------------------------------------------------|
| 275 | GI, Histamine H2 antagonist          | FN | TN | TN | -                     | -      | - | skin fibr                                          |
| 276 | CNS, SNRI                            | FN | TN | TN | kid                   | -      | - | tes ad                                             |
| 277 | CNS, 5-HT1b/d agonist                | FN | TN | TN | -                     | -      | - | adr bpha; tes ad                                   |
| 278 | CVS, Alpha1 antagonist               | FN | TP | TP | br ;li ; kid ;<br>hrt | -      | - | adr bpha; mam ac                                   |
| 279 | AF, remaining, allylamine derivative | FN | NT | FN | hrt ; adr             | -      | - | tes tu; li ad; li ac                               |
| 280 | RS, Beta2 agonist                    | FN | TP | TP | -                     | -      | - | ova leio                                           |
| 281 | HM, estrogen agonist,                | FN | TP | TP | -                     | -      | - | li ad; mam ca                                      |
| 282 | CVS, platelet aggregation inhibito   | FN | NC | FN | -                     | li ht  | - | thyr ad; adr bpha; ut ac; li ad; ova ad;<br>mam ad |
| 283 | UB, Anticholinergic                  | FN | TN | TN | -                     | -      | - | kid sar                                            |
| 284 | CVS, Loop diuretic                   | FN | NC | FN | -                     | -      | - | kid ac; kid ad                                     |
| 285 | CVS, ACE inhibitor                   | FN | TN | TN | -                     | -      | - | mam fad                                            |
| 286 | HM, GnRH agonist                     | FN | TP | TP | -                     | -      | - | pit ad; pit ca                                     |
| 287 | UB, Anticholinergic                  | FN | TN | TN | -                     | -      | - | skin sar                                           |
| 288 | RS, Beta2 agonist                    | FN | TP | TP | lu ; hrt              | hrt ht | - | ova leio; pit ad; pit ac                           |
| 289 | CVS, anticoagulant                   | FN | TN | TN | -                     | -      | - | pan ad/ca                                          |
