# Supplementary material for: Prediction of the Carcinogenic Potential of Human Pharmaceuticals Using Repeated Dose Toxicity Data and Their Pharmacological Properties
Source: PubMed Central journal article supplement (PMC5063850; doi:10.3389/fmed.2016.00045), 2016-10-14
Supplement: table_2.pdf [file table_2.pdf]

**Table S2 (Supplementary Material) Summary of the observations in the sub-chronic and carcinogenicity studies, sorted by mode of action**

| #   | Mode of Action                       | Cat. His | Cat. Ph. | Fin. cat. | Weight                                                                   | Sub-chronic       |                            | Carcinogenicity                   |
|-----|--------------------------------------|----------|----------|-----------|--------------------------------------------------------------------------|-------------------|----------------------------|-----------------------------------|
|     |                                      |          |          |           |                                                                          | HT                | HP                         |                                   |
| 231 | AB, Fluoroquinolone                  | FN       | NT       | FN        | col ; kid                                                                | -                 | -                          | hsyst leu                         |
| 244 | AB, Fluoroquinolone                  | FN       | NT       | FN        | -                                                                        | -                 | -                          | pan tu                            |
| 263 | AB, Fluoroquinolone                  | FN       | NT       | FN        | ce ; hrt ; li ;<br>spl ; adr ;<br>ova                                    | -                 | -                          | kid ac                            |
| 158 | AB, remaining, bactericidal          | FP       | NT       | FP        | li ; spl ; kid ;<br>thyr                                                 | -                 | stom hp; ut<br>hp; stom hp | -                                 |
| 182 | AF, conazole derivative              | TP       | NT       | TP        | li ; kid ; spl ;<br>br ; ova ;<br>thyr                                   | -                 | thyr hp                    | tes tu; br astr; skin mel; mam ac |
| 226 | AF, conazole derivative              | FN       | NT       | FN        | li                                                                       | li ht             | -                          | li ad                             |
| 236 | AF, conazole derivative              | FN       | NT       | FN        | adr ; li ; hrt<br>; kid ; thy ;<br>lu ; spl ;<br>pan ; br ;<br>gon ; ova | adr ht            | -                          | soft t sar                        |
| 279 | AF, remaining, allylamine derivative | FN       | NT       | FN        | hrt ; adr                                                                | -                 | -                          | tes tu; li ad; li ac              |
| 2   | AF, remaining, benzimidazole         | TN       | NT       | TN        | -                                                                        | -                 | -                          | -                                 |
| 108 | AI, COX2 inhibitor                   | TN       | TN       | TN        | -                                                                        | -                 | -                          | -                                 |
| 72  | AI, COX2-inhibitor                   | TN       | TN       | TN        | -                                                                        | -                 | -                          | -                                 |
| 206 | AI, COX2-inhibitor                   | FN       | TN       | TN        | li                                                                       | -                 | -                          | li ac                             |
| 222 | AI, COX2-inhibitor                   | FN       | TN       | TN        | -                                                                        | li ht;<br>thyr ht | -                          | thyr ad; li ad                    |
| 44  | AI, NSAID                            | TN       | TN       | TN        | kid                                                                      | -                 | -                          | -                                 |
| 45  | AI, NSAID                            | TN       | TN       | TN        | -                                                                        | -                 | -                          | -                                 |
| 50  | AI, NSAID                            | TN       | TN       | TN        | kid ; spl                                                                | -                 | -                          | -                                 |
| 64  | AI, NSAID                            | TN       | TN       | TN        | -                                                                        | -                 | -                          | -                                 |

|     |                                    |    |     |    |                    |         |                   |                                                   |
|-----|------------------------------------|----|-----|----|--------------------|---------|-------------------|---------------------------------------------------|
| 74  | AI, NSAID                          | TN | TN  | TN | -                  | -       | -                 | -                                                 |
| 83  | AI, NSAID                          | TN | TN  | TN | li ; kid           | -       | -                 | -                                                 |
| 91  | AI, NSAID                          | TN | TN  | TN | hrt ; adr ;<br>kid | -       | -                 | -                                                 |
| 124 | AI, NSAID                          | TN | TN  | TN | -                  | -       | -                 | -                                                 |
| 129 | AI, NSAID                          | TN | TN  | TN | -                  | -       | -                 | -                                                 |
| 164 | AI, NSAID                          | TP | TN  | TN | -                  | -       | kid hp; UGT<br>hp | adr bpha                                          |
| 260 | AI, NSAID                          | FN | TN  | TN | -                  | -       | -                 | tes ad;                                           |
| 71  | AI, NSAID,                         | TN | TN  | TN | -                  | -       | -                 | -                                                 |
| 7   | AI, remaining,                     | TN | TN* | TN | li;                | -       | -                 | -                                                 |
| 122 | AI, remaining, cytokine-modulat    | TN | TN* | TN | -                  | -       | -                 | -                                                 |
| 73  | AM, remaining, antimalarial        | TN | NT  | TN | -                  | -       | -                 | -                                                 |
| 97  | AM, remaining, Antiparasite.       | TN | NT  | TN | -                  | -       | -                 | -                                                 |
| 123 | AV,                                | TN | NT  | TN | -                  | -       | -                 | -                                                 |
| 246 | AV, CCR5 receptor antagonist       | FN | NT  | FN | -                  | thyr ht | -                 | thyr ad                                           |
| 171 | AV, Guanosine analogue             | TP | NT  | TP | -                  | pit ht  | tes hp            | mam ac; skin sar                                  |
| 218 | AV, hepatitis B-inhibitor          | FN | NT  | FN | -                  | -       | -                 | pan ad; pan ac; li ad; li ac; Zymgl ca;<br>br gli |
| 135 | AV, herpes genitalis               | TN | NT  | TN | -                  | -       | -                 | -                                                 |
| 60  | AV, immunostimulant                | TN | NT  | TN | li ; kid ; adr     | -       | -                 | -                                                 |
| 104 | AV, Nucleoside inhibitor           | TN | NT  | TN | -                  | -       | -                 | -                                                 |
| 18  | AV, protease inhibitor             | TN | NT  | TN | -                  | -       | -                 | -                                                 |
| 189 | AV, protease inhibitor             | TP | NT  | TP | -                  | thyr ht | li hp; kid hp     | adr bpha                                          |
| 55  | AV, viral DNA polymerase inhibitor | TN | NT  | TN | -                  | -       | -                 | -                                                 |
| 3   | BM, bisphosphonate                 | TN | TN  | TN | -                  | -       | -                 | -                                                 |
| 33  | BM, bisphosphonate                 | TN | TN  | TN | -                  | -       | -                 | -                                                 |
| 87  | BM, Bisphosphonate,                | TN | TN  | TN | thyr ;<br>parath   | bo ht   | -                 | -                                                 |
| 28  | BM, remaining, calcium-mimetic     | TN | TN* | TN | -                  | -       | -                 | -                                                 |

|     |                                        |    |     |    |                                        |                    |                   |                               |
|-----|----------------------------------------|----|-----|----|----------------------------------------|--------------------|-------------------|-------------------------------|
| 234 | BM, remaining, Isoflavone              | FN | TN* | TN | -                                      | -                  | -                 | pit ad; li ad                 |
| 4   | CNS, 5-HT1b/d agonist                  | TN | TN  | TN | -                                      | thyr ht;<br>li ht  | -                 | -                             |
| 277 | CNS, 5-HT1b/d agonist                  | FN | TN  | TN | -                                      | -                  | -                 | adr bpha; tes ad              |
| 107 | CNS, 5-HT1b/d agonist,                 | TN | TN  | TN | -                                      | -                  | -                 | -                             |
| 181 | CNS, 5-HT1b/d agonist,                 | TP | TN  | TN | kid                                    | -                  | epi hp; tes<br>hp | thyr ad; pit ad; thy bthym    |
| 220 | CNS, 5HT2 antagonist                   | FN | NC  | FN | -                                      | -                  | -                 | li ad                         |
| 185 | CNS, 5-HT2 antagonist                  | TP | NC  | TP | li                                     | thyr ht;<br>mam ht | mam hp            | thyr ad; mam ac               |
| 95  | CNS, 5-HT3 antagonist                  | TN | TN  | TN | -                                      | -                  | -                 | -                             |
| 176 | CNS, 5-HT3 antagonist                  | TP | TN  | TN | -                                      | -                  | -                 | li ad; li ac                  |
| 24  | CNS, antiepileptic, Na-channel blocker | TN | TN  | TN | -                                      | li ht              | -                 | -                             |
| 49  | CNS, antiepileptic, Na-channel blocker | TN | TN  | TN | -                                      | -                  | -                 | -                             |
| 65  | CNS, antiepileptic, Na-channel blocker | TN | TN  | TN | -                                      | li ht              | -                 | -                             |
| 66  | CNS, antiepileptic, Na-channel blocker | TN | TN  | TN | -                                      | li ht              | -                 | -                             |
| 183 | CNS, antiepileptic, Na-channel blocker | TP | TN  | TN | kid ; adr                              | li ht              | kid hp            | li ac                         |
| 239 | CNS, antiepileptic, Na-channel blocker | FN | TN  | TN | adr ; pit ;<br>kid ; li                | -                  | -                 | adr bpha                      |
| 5   | CNS, Benzodiazepine                    | TN | TN  | TN | -                                      | -                  | -                 | -                             |
| 204 | CNS, Benzodiazepine                    | FN | TN  | TN | -                                      | -                  | -                 | thyr ad; thy lymph; ut schwan |
| 248 | CNS, benzodiazepine                    | FN | TN  | TN | -                                      | li ht              | -                 | thyr ad                       |
| 142 | CNS, benzodiazepine-like hypnotic      | TN | TN  | TN | -                                      | -                  | -                 | -                             |
| 143 | CNS, benzodiazepine-like hypnotic      | TN | TN  | TN | spl ; li ; kid ;<br>tes ; hrt ;<br>pit | li ht              | -                 | -                             |
| 274 | CNS, DA2 agonist                       | FN | TP  | TP | adr                                    | li ht              | -                 | tes ad; skin fibr             |
| 245 | CNS, DA2 agonist                       | FN | TP  | TP | -                                      | -                  | -                 | tes ad; tes ca                |
| 265 | CNS, DA2 agonist                       | FN | TP  | TP | -                                      | -                  | -                 | pit ad; ut ac                 |
| 270 | CNS, DA2 agonist                       | FN | TP  | TP | -                                      | -                  | -                 | tes ad                        |

|     |                                              |    |     |    |                 |                |         |                                          |
|-----|----------------------------------------------|----|-----|----|-----------------|----------------|---------|------------------------------------------|
| 273 | CNS, DA2-antagonist                          | FN | TP  | TP | -               | -              | -       | islet ad; mam ac; pit ad                 |
| 163 | CNS, DA2-antagonist, Benzamide,              | TP | TP  | TP | -               | -              | mam hp  | pan ad; pan ac; adr bpha; mam ca; pit ca |
| 188 | CNS, DA2-antagonist, DA3 antagonist          | TP | TP  | TP | li              | -              | lu hp   | mam ca                                   |
| 59  | CNS, DA2-antagonist/5HT antagonist           | TN | TP  | TP | -               | -              | -       | -                                        |
| 84  | CNS, Opioid, mu-agonist                      | TN | TN  | TN | -               | -              | -       | -                                        |
| 205 | CNS, Opioid, mu-agonist                      | FN | TN  | TN | -               | -              | -       | tes tu; hsyst leu                        |
| 132 | CNS, Opioid, mu-agonist, anticholinergic     | TN | TN  | TN | -               | -              | -       | -                                        |
| 85  | CNS, Opioid, mu-antagonist                   | TN | TN  | TN | -               | -              | -       | -                                        |
| 86  | CNS, Opioid, mu-antagonist                   | TN | TN  | TN | -               | -              | -       | -                                        |
| 75  | CNS, Opioid, remaining, kappa agonist        | TN | TN* | TN | -               | -              | -       | -                                        |
| 22  | CNS, remaining 5HT, 5-HT1-agonist            | TN | TN* | TN | -               | -              | -       | -                                        |
| 56  | CNS, remaining, acetylcholinesterase inhib   | TN | TN* | TN | -               | sgl ht         | -       | -                                        |
| 230 | CNS, remaining, alpha2-delta agonist         | FN | NC  | FN | -               | -              | -       | pan ac; pan ad; tes ad; ut polyp         |
| 96  | CNS, remaining, AMPA Glutamate antagonist    | TN | TN* | TN | -               | -              | -       | -                                        |
| 251 | CNS, remaining, antidepressant               | FN | NC  | FN | -               | li ht; thyr ht | -       | thyr ac; mam ca; li ad; li ac            |
| 106 | CNS, remaining, cannabinoid antagonist       | TN | TN* | TN | -               | -              | -       | -                                        |
| 213 | CNS, remaining, Carbonic anhydrase inhibitor | FN | TP* | TP | -               | -              | -       | UGT pap                                  |
| 217 | CNS, remaining, COMT-inhibitor               | FN | NC  | FN | adr             | -              | -       | kid ad; kid ac                           |
| 20  | CNS, remaining, DA-NA uptake inhibitor       | TN | TN* | TN | li ; adr ; thyr | li ht          | -       | -                                        |
| 177 | CNS, remaining, Electron transporter         | TP | TP* | TP | -               | -              | stom hp | Squamous cell and basal carcinomas       |
| 118 | CNS, remaining, GABA-enhancer                | TN | TN* | TN | -               | -              | -       | -                                        |
| 138 | CNS, remaining, GABA-metab. inhib            | TN | TN* | TN | -               | -              | -       | -                                        |

|     |                                            |    |     |    |                                   |        |        |                                |
|-----|--------------------------------------------|----|-----|----|-----------------------------------|--------|--------|--------------------------------|
| 81  | CNS, remaining, MAO-A inhibitor            | TN | TN* | TN | lu ; kid ;<br>thyr ; tes ;<br>ova | -      | -      | -                              |
| 102 | CNS, remaining, MAO-B inhibitor            | TN | TN* | TN | -                                 | li ht  | -      | -                              |
| 197 | CNS, remaining, melatonin receptor agonist | FN | TN* | TN | -                                 | -      | -      | li ad; li ac                   |
| 136 | CNS, Remaining, Nicotine agonist           | TN | TN* | TN | -                                 | -      | -      | -                              |
| 223 | CNS, remaining, NMDA-antagonist            | FN | TN* | TN | -                                 | -      | -      | tes ad                         |
| 261 | CNS, remaining, nootropic drug             | FN | TN* | TN | -                                 | -      | -      | adr bpha                       |
| 103 | CNS, SNRI                                  | TN | TN  | TN | -                                 | -      | -      | -                              |
| 137 | CNS, SNRI                                  | TN | TN  | TN | -                                 | -      | -      | -                              |
| 250 | CNS, SNRI                                  | FN | TN  | TN | -                                 | li ht  | -      | thyr ad                        |
| 276 | CNS, SNRI                                  | FN | TN  | TN | kid                               | -      | -      | tes ad                         |
| 29  | CNS, SSRI                                  | TN | TN  | TN | -                                 | -      | -      | -                              |
| 35  | CNS, SSRI                                  | TN | TN  | TN | -                                 | -      | -      | -                              |
| 54  | CNS, SSRI                                  | TN | TN  | TN | -                                 | -      | -      | -                              |
| 112 | CNS, SSRI                                  | TN | TN  | TN | kid                               | li ht  | -      | -                              |
| 157 | CNS, SSRI                                  | FP | TN  | TN | -                                 | li ht  | li hp  | -                              |
| 262 | CNS, SSRI                                  | FN | TN  | TN | li                                | -      | -      | In lymph                       |
| 88  | CNS, SSRI, 5-HT antagonist                 | TN | TN  | TN | -                                 | -      | -      | -                              |
| 15  | CVS, ACE inhibitor                         | TN | TN  | TN | -                                 | -      | -      | -                              |
| 37  | CVS, ACE inhibitor                         | TN | TN  | TN | -                                 | -      | -      | -                              |
| 69  | CVS, ACE inhibitor                         | TN | TN  | TN | -                                 | -      | -      | -                              |
| 117 | CVS, ACE inhibitor                         | TN | TN  | TN | kid                               | kid ht | -      | -                              |
| 174 | CVS, ACE inhibitor                         | TP | TN  | TN | thyr                              | -      | kid hp | pit ad; br ac; mes lip; pit ac |
| 186 | CVS, ACE inhibitor                         | TP | TN  | TN | -                                 | kid ht | kid hp | In bhaem                       |
| 208 | CVS, ACE inhibitor                         | FN | TN  | TN | kid ; li                          | kid ht | -      | tes tu                         |
| 266 | CVS, ACE inhibitor                         | FN | TN  | TN | -                                 | -      | -      | thyr ac                        |
| 271 | CVS, ACE inhibitor                         | FN | TN  | TN | -                                 | -      | -      | kid ad                         |

|     |                                       |    |    |    |                     |               |               |                         |
|-----|---------------------------------------|----|----|----|---------------------|---------------|---------------|-------------------------|
| 285 | CVS, ACE inhibitor                    | FN | TN | TN | -                   | -             | -             | mam fad                 |
| 233 | CVS, ACE-inhibitor                    | FN | TN | TN | kid                 | -             | -             | thyr ad; ut polyp       |
| 159 | CVS, Alpha1 agonist                   | FP | TN | TN | -                   | -             | mam hp        | -                       |
| 249 | CVS, Alpha1 agonist                   | FN | TN | TN | -                   | -             | -             | tes ad                  |
| 19  | CVS, Alpha1 antagonist                | TN | TP | TP | kid ; br ; tes      | -             | -             | -                       |
| 34  | CVS, Alpha1 antagonist                | TN | TP | TP | -                   | -             | -             | -                       |
| 133 | CVS, Alpha1 antagonist                | TN | TP | TP | -                   | -             | -             | -                       |
| 144 | CVS, Alpha1 antagonist                | FP | TP | TP | -                   | -             | mam hp        | -                       |
| 192 | CVS, Alpha1 antagonist                | TP | TP | TP | -                   | li ht; vag ht | li hp; mam hp | thyr ad; thyr ac        |
| 193 | CVS, Alpha1 antagonist                | TP | TP | TP | -                   | -             | mam hp        | mam ad; hsyst leu       |
| 278 | CVS, Alpha1 antagonist                | FN | TP | TP | br ; li ; kid ; hrt | -             | -             | adr bpha; mam ac        |
| 161 | CVS, Alpha1 antagonist and 5-HT1A     | FP | TN | TP | -                   | -             | bm hp         | -                       |
| 145 | CVS, Alpha2 agonist                   | FP | TN | TN | -                   | -             | thy hp        | -                       |
| 149 | CVS, Alpha2 agonist                   | FP | TN | TN | -                   | -             | islet hp      | -                       |
| 167 | CVS, Alpha2 agonist, indicatie ocular | TP | TN | TN | -                   | int ht        | int hp        | pan ac; thyr ad; mam ad |
| 13  | CVS, Angiotensin II antagonist        | TN | TN | TN | -                   | -             | -             | -                       |
| 23  | CVS, Angiotensin II antagonist        | TN | TN | TN | -                   | kid ht        | -             | -                       |
| 40  | CVS, Angiotensin II antagonist        | TN | TN | TN | -                   | -             | -             | -                       |
| 156 | CVS, Angiotensin II antagonist        | FP | TN | TN | -                   | -             | kid hp        | -                       |
| 162 | CVS, Angiotensin II antagonist        | FP | TN | TN | -                   | kid ht        | kid hp        |                         |
| 10  | CVS, anticoagulant                    | TN | TN | TN | -                   | -             | -             | -                       |
| 289 | CVS, anticoagulant                    | FN | TN | TN | -                   | -             | -             | pan ad/ca               |
| 14  | CVS, Beta antagonist                  | TN | TN | TN | -                   | -             | -             | -                       |
| 16  | CVS, Beta antagonist                  | TN | TN | TN | -                   | -             | -             | -                       |
| 17  | CVS, Beta antagonist                  | TN | TN | TN | hrt ; li            | -             | -             | -                       |

|     |                                       |    |    |    |                                                            |        |                   |                                                      |
|-----|---------------------------------------|----|----|----|------------------------------------------------------------|--------|-------------------|------------------------------------------------------|
| 25  | CVS, Beta antagonist                  | TN | TN | TN | pit ; lu ; hrt<br>; spl ; kid ;<br>adr ; tes ;<br>ova ; br | -      | -                 | -                                                    |
| 26  | CVS, Beta antagonist                  | TN | TN | TN | -                                                          | -      | -                 | -                                                    |
| 126 | CVS, Beta antagonist                  | TN | TN | TN | -                                                          | -      | -                 | -                                                    |
| 127 | CVS, Beta antagonist                  | TN | TN | TN | -                                                          | -      | -                 | -                                                    |
| 147 | CVS, Beta antagonist                  | FP | TN | TN | -                                                          | adr ht | thyr hp           | -                                                    |
| 203 | CVS, Beta antagonist                  | FN | TN | TN | tes ; adr ; li                                             | -      | -                 | pit tu                                               |
| 219 | CVS, Beta antagonist                  | FN | TN | TN | kid                                                        | -      | -                 | skin SCP                                             |
| 243 | CVS, Beta antagonist                  | FN | TN | TN | thyr ; li ;<br>adr ; kid                                   | -      | -                 | li ad                                                |
| 148 | CVS, Beta antagonist /alpha-1 blocker | FP | TN | TN | li                                                         | -      | li hp             | -                                                    |
| 255 | CVS, Beta antagonist,                 | FN | TN | TN | -                                                          | -      | -                 | spl bhaem                                            |
| 9   | CVS, Calcium antagonist               | TN | TN | TN | hrt ; kid                                                  | adr ht | -                 | -                                                    |
| 90  | CVS, Calcium antagonist               | TN | TN | TN | spl ; kid ;<br>ova ; hrt ; li<br>; adr ; br                | -      | -                 | -                                                    |
| 92  | CVS, Calcium antagonist               | TN | TN | TN | -                                                          | -      | -                 | -                                                    |
| 93  | CVS, Calcium antagonist               | TN | TN | TN | -                                                          | -      | -                 | -                                                    |
| 165 | CVS, Calcium antagonist               | TP | TN | TN | li                                                         | li ht  | ln hp; thyr<br>hp | thyr ad                                              |
| 172 | CVS, Calcium antagonist               | TP | TN | TN | -                                                          | -      | col hp            | mam fad; adr bpha; tes ad; pit ad;<br>mam ac; pit ca |
| 200 | CVS, Calcium antagonist               | FN | TN | TN | -                                                          | -      | -                 | ut polyp                                             |
| 235 | CVS, Calcium antagonist               | FN | TN | TN | -                                                          | -      | -                 | tes ad                                               |
| 237 | CVS, Calcium antagonist               | FN | TN | TN | ova                                                        | -      | -                 | tes ad                                               |
| 240 | CVS, Calcium antagonist               | FN | TN | TN | -                                                          | adr ht | -                 | mam fad; pit ad                                      |
| 256 | CVS, Calcium antagonist               | FN | TN | TN | -                                                          | -      | -                 | thyr ad; thyr ac                                     |
| 247 | CVS, Calcium antagonist.              | FN | TN | TN | li ; hrt                                                   | -      | -                 | ut polyp; oral SCC                                   |

|     |                                     |    |     |    |                                                      |                                        |                   |                                                    |
|-----|-------------------------------------|----|-----|----|------------------------------------------------------|----------------------------------------|-------------------|----------------------------------------------------|
| 38  | CVS, class 1C antiarrhythmic        | TN | TN  | TN | thyr ; li                                            | -                                      | -                 | -                                                  |
| 53  | CVS, class 1C antiarrhythmic        | TN | TN  | TN | hrt ; li                                             | -                                      | -                 | -                                                  |
| 6   | CVS, endothelin antagonist          | TN | TN  | TN | -                                                    | li ht; int<br>ht; adr<br>ht; mam<br>ht | nose hp; bm<br>hp | -                                                  |
| 115 | CVS, endothelin antagonist          | TN | TN  | TN | -                                                    | -                                      | -                 | -                                                  |
| 105 | CVS, Imidazoline agonist            | TN | TN  | TN | adr ; tes                                            | -                                      | -                 | -                                                  |
| 252 | CVS, Imidazoline agonist            | FN | TN  | TN | -                                                    | -                                      | -                 | adr tu                                             |
| 98  | CVS, Loop diuretic                  | TN | NC  | TN | -                                                    | -                                      | -                 | -                                                  |
| 229 | CVS, Loop diuretic                  | FN | NC  | FN | -                                                    | -                                      | -                 | thyr ad; pit ad                                    |
| 253 | CVS, Loop diuretic                  | FN | NC  | FN | -                                                    | -                                      | -                 | tes ad; ut ac                                      |
| 284 | CVS, Loop diuretic                  | FN | NC  | FN | -                                                    | -                                      | -                 | kid ac; kid ad                                     |
| 100 | CVS, Na-channel block               | TN | TN  | TN | -                                                    | -                                      | -                 | -                                                  |
| 101 | CVS, Na-channel block               | TN | TN  | TN | -                                                    | li ht                                  | -                 | -                                                  |
| 272 | CVS, Na-channel block               | FN | TN  | TN | -                                                    | li ht                                  | -                 | thyr ad; tes ad; adr bpha; adr bpha                |
| 77  | CVS, PDE3 inhibitor                 | TN | TN  | TN | adr                                                  | -                                      | -                 | -                                                  |
| 209 | CVS, PDE3 inhibitor                 | FN | TN  | TN | li ; kid                                             | -                                      | -                 | adr bpha                                           |
| 99  | CVS, platelet aggregation inhibito  | TN | NC  | TN | -                                                    | li ht;<br>thyr ht                      | -                 | -                                                  |
| 282 | CVS, platelet aggregation inhibito  | FN | NC  | FN | -                                                    | li ht                                  | -                 | thyr ad; adr bpha; ut ac; li ad; ova<br>ad; mam ad |
| 63  | CVS, remaining, 5-HT2 antagonist    | TN | TN* | TN | spl ; li ; kid ;<br>hrt ; pan ;<br>br ; thy ;<br>adr | -                                      | -                 | -                                                  |
| 141 | CVS, remaining, B1 partial agonist  | TN | TN* | TN | -                                                    | -                                      | -                 | -                                                  |
| 232 | CVS, remaining, D1/alpha agonist    | FN | TN* | TN | adr ; kid                                            | -                                      | -                 | pan ad                                             |
| 36  | CVS, remaining, hemostatic          | TN | TN* | TN | -                                                    | -                                      | -                 | -                                                  |
| 169 | CVS, remaining, Hydrazinophthalzine | TP | TP* | TP | -                                                    | pit ht                                 | thyr hp;          | thyr ad; thyr ac                                   |



|     |                                       |    |     |    |                                          |                               |         |                                                            |
|-----|---------------------------------------|----|-----|----|------------------------------------------|-------------------------------|---------|------------------------------------------------------------|
| 216 | CVS, remaining, imidazole, PDE-inh    | FN | TN* | TN | -                                        | -                             | -       | adr bpha                                                   |
| 89  | CVS, remaining, Nitr/K+ATP agonist    | TN | TN* | TN | -                                        | -                             | -       | -                                                          |
| 113 | CVS, remaining, PDE5-inhibitor        | TN | TN* | TN | -                                        | li ht;<br>thyr ht             | -       | -                                                          |
| 225 | CVS, remaining, Quinolone vasodila    | FN | TN* | TN | li ; thyr ;<br>adr ; spl ;<br>pros ; tes | -                             | -       | adr bpha                                                   |
| 198 | CVS, remaining, renin inhibitor       | FN | TN* | TN | -                                        | col ht                        | -       | col ad; col ac                                             |
| 78  | CVS, remaining, vasodilator           | TN | TN* | TN | -                                        | hrt ht                        | -       | -                                                          |
| 110 | CVS, vasopressin-2 agonist            | TN | TN  | TN | -                                        | -                             | -       | -                                                          |
| 131 | CVS, vasopressin-2 agonist            | TN | TN  | TN | -                                        | -                             | -       | -                                                          |
| 212 | GI, 5HT4 agonist                      | FN | TN  | TN | -                                        | -                             | -       | tes tu; pit ad                                             |
| 121 | GI, 5HT4-agonist                      | TN | TN  | TN | -                                        | -                             | -       | -                                                          |
| 269 | GI, 5HT4-agonist                      | FN | TN  | TN | -                                        | -                             | -       | thyr ad; mam fad; pan ad; adr bpha;<br>li ad; pit ad       |
| 48  | GI, Histamine H2 antagonist           | TN | TN  | TN | br ; hrt ; kid<br>; tes ; li ;<br>ova    | -                             | -       | -                                                          |
| 94  | GI, Histamine H2 antagonist           | TN | TN  | TN | li ; kid                                 | -                             | -       | -                                                          |
| 210 | GI, Histamine H2 antagonist           | FN | TN  | TN | li                                       | -                             | -       | tes ad                                                     |
| 275 | GI, Histamine H2 antagonist           | FN | TN  | TN | -                                        | -                             | -       | skin fibr                                                  |
| 41  | GI, Proton pump inhibitor             | TN | TP  | TP | -                                        | -                             | -       | -                                                          |
| 178 | GI, Proton pump inhibitor             | TP | TP  | TP | li ; li ; lu ;<br>stom                   | li ht;<br>stom ht;<br>stom ht | stom hp | tes ad; tes ad                                             |
| 187 | GI, Proton pump inhibitor             | TP | TP  | TP | li ; kid ;<br>stom ; thyr<br>; hrt ; spl | li ht;<br>stom ht;<br>thyr ht | stom hp | adr bpha; tes ad; stom SCP; stom<br>SCC; hsyst leu; pit ad |
| 259 | GI, Proton pump inhibitor             | FN | TP  | TP | -                                        | stom ht                       | -       | stom tu; stom SCC; li ad                                   |
| 119 | GI, remaining, anti-osteoporose agent | TN | TN* | TN | -                                        | -                             | -       | -                                                          |
| 32  | GI, remaining, Fe-chelator            | TN | TN* | TN | -                                        | -                             | -       | -                                                          |

|     |                                          |    |     |    |            |                                |                |                                                      |
|-----|------------------------------------------|----|-----|----|------------|--------------------------------|----------------|------------------------------------------------------|
| 70  | GI, remaining, Opioid, mu-agonist        | TN | TN* | TN | -          | -                              | -              | -                                                    |
| 30  | GI, remaining, Phosphate binder          | TN | TN* | TN | -          | -                              | -              | -                                                    |
| 238 | GI, remaining, Sugar alcohol             | FN | TN* | TN | -          | li ht                          | -              | tes tu                                               |
| 80  | GI, remaining, Synthetisch prostaglandin | TN | TN* | TN | adr ; li   | -                              | -              | -                                                    |
| 215 | HM, Dual 5 reductase inhibitor.          | FN | TP  | TP | -          | -                              | -              | tes ad                                               |
| 224 | HM, Dual 5-reductase inhibitor           | FN | TP  | TP | -          | -                              | -              | thyr ad                                              |
| 221 | HM, estrogen agonist                     | FN | TP  | TP | -          | -                              | -              | pit ad                                               |
| 281 | HM, estrogen agonist,                    | FN | TP  | TP | -          | -                              | -              | li ad; mam ca                                        |
| 21  | HM, GnRH agonist                         | TN | TP  | TP | -          | -                              | -              | -                                                    |
| 175 | HM, GnRH agonist                         | TP | TP  | TP | -          | -                              | tes hp         | pit ad                                               |
| 180 | HM, GnRH agonist                         | TP | TP  | TP | br         | pit ht                         | pit hp         | pit ad                                               |
| 254 | HM, GnRH agonist                         | FN | TP  | TP | -          | -                              | -              | adr bpha; adr mpha; islet ad; tes ad; pit ad; pit ca |
| 286 | HM, GnRH agonist                         | FN | TP  | TP | -          | -                              | -              | pit ad; pit ca                                       |
| 42  | HM, progestagen-estrogen contraceptive   | TN | TP  | TP | pit ; thyr | -                              | -              | -                                                    |
| 257 | HM, progestagen-estrogen contraceptive.  | FN | TP  | TP | adr ; li   | -                              | -              | pit ad; mam ad; mam ac                               |
| 214 | HM, progesterone antagonist, birth cont  | FN | TP  | TP | li         | -                              | -              | li ad; ut ac; mam ac                                 |
| 166 | HM, remaining, antiandrogen,             | TP | TP  | TP | tes ; adr  | li ht; ova ht; adr ht; thyr ht | tes hp; ova hp | te ad; thyr ad; ut ac                                |
| 241 | HM, remaining, aromatase inhibitor       | FN | TP  | TP | -          | li ht                          | -              | ova gca; UGT pap                                     |
| 179 | HM, selective estrogen modulator         | TP | TP  | TP | -          | -                              | ova hp         | kid ac; ova ad                                       |
| 201 | HM, selective estrogen modulator         | FN | TP  | TP | -          | -                              | -              | kid ad; kid ac; ova ad                               |
| 120 | IS, Immunosuppressive                    | TN | TP  | TP | -          | -                              | -              | -                                                    |
| 140 | IS, Immunosuppressive                    | TN | TP  | TP | -          | -                              | -              | -                                                    |

|     |                                               |    |     |    |                               |                     |         |                               |
|-----|-----------------------------------------------|----|-----|----|-------------------------------|---------------------|---------|-------------------------------|
| 150 | IS, Immunosuppressive                         | FP | TP  | TP | -                             | -                   | In hp   | -                             |
| 47  | IS, Immunosuppressive, mTOR inhibitor         | TN | TP  | TP | -                             | thyr ht             | -       | -                             |
| 152 | IS, Immunosuppressive, mTOR inhibitor         | FP | TP  | TP | -                             | stom ht;<br>thyr ht | stom hp | -                             |
| 52  | IS, Immunosuppressive, S1P antagonist         | TN | TP  | TP | -                             | -                   | -       | -                             |
| 8   | IS, remaining                                 | TN | NC  | TN | -                             | -                   | -       | -                             |
| 242 | IS, remaining, imidazothiazole derivative     | FN | NC  | FN | -                             | -                   | -       | pit ad                        |
| 76  | MB, antidiabetic, alfa-glucosidase inhib      | TN | TN  | TN | -                             | -                   | -       | -                             |
| 194 | MB, antidiabetic, alfa-glucosidase inhib      | FN | TN  | TN | -                             | -                   | -       | tes ad; kid ad; kid ac;       |
| 68  | MB, antidiabetic, DPP4 inhibitor              | TN | TN  | TN | -                             | thyr ht;<br>li ht   |         | -                             |
| 111 | MB, antidiabetic, DPP4 inhibitor              | TN | TN  | TN | -                             | -                   |         | -                             |
| 114 | MB, antidiabetic, DPP4 inhibitor              | TN | TN  | TN | -                             | -                   | -       | -                             |
| 139 | MB, antidiabetic, DPP4 inhibitor              | TN | TN  | TN | -                             | -                   | -       |                               |
| 134 | MB, antidiabetic, remaining, PPAR-gamma       | TN | TP* | TP | hrt ; li                      | li ht               | -       | -                             |
| 151 | MB, Antidiabetic, remaining, SGLT-2 inhibitor | FP | TN* | TN | -                             | kid ht              | kid hp  | -                             |
| 58  | MB, Antidiabetic, remaining, SU derivative    | TN | TN* | TN | -                             | -                   | -       | -                             |
| 46  | MB, fibrate                                   | TN | TP  | TP | -                             | -                   | -       | -                             |
| 202 | MB, fibrate                                   | FN | TP  | TP | -                             | -                   | -       | tes tu; adr bpha; li ac       |
| 211 | MB, fibrate                                   | FN | TP  | TP | li ; kid ; hrt ;<br>adr ; tes | -                   | -       | pan ad; stom tu; li ad; li ac |
| 27  | MB, HMG-CoA reductase inhibitor               | TN | TP  | TP | -                             | -                   | -       | -                             |
| 146 | MB, HMG-CoA reductase inhibitor               | FP | TP  | TP | -                             | -                   | li hp   | -                             |

|     |                                         |    |     |    |                                             |        |                |                                                                 |
|-----|-----------------------------------------|----|-----|----|---------------------------------------------|--------|----------------|-----------------------------------------------------------------|
| 190 | MB, HMG-CoA reductase inhibitor         | TP | TP  | TP | -                                           | li ht  | li hp; stom hp | ut polyp                                                        |
| 173 | MB, HMG-CoA-reductase inhibitor         | TP | TP  | TP | thyr                                        | -      | stom hp        | stom SCP; thyr ac; thyr ad                                      |
| 267 | MB, HMG-CoA-reductase inhibitor         | FN | TP  | TP | -                                           | -      | -              | thyr ad; li ac                                                  |
| 160 | MB, remaining, 3 beta-hydroxysteroid de | FP | TN* | TN | -                                           | adr ht | adr hp         | -                                                               |
| 130 | MB, remaining, Aldose reductase inhibit | TN | TN* | TN | -                                           | -      | -              | -                                                               |
| 43  | MB, remaining, hypertriglyceridemia     | TN | TN* | TN | -                                           | -      | -              | -                                                               |
| 258 | MB, remaining, Inhib.growth hormone     | FN | TP* | TP | -                                           | -      | -              | sk sar; ut ac                                                   |
| 57  | MB, remaining, lipid replacement        | TN | TN* | TN | -                                           | -      | -              | -                                                               |
| 1   | MB, remaining, nicotinic acid derived,  | TN | TN* | TN | -                                           | -      | -              | -                                                               |
| 61  | RS, Anticholinergic                     | TN | TN  | TN | -                                           | -      | -              | -                                                               |
| 128 | RS, Anticholinergic                     | TN | TN  | TN | -                                           | -      | -              | -                                                               |
| 191 | RS, Beta2 agonist                       | TP | TP  | TP | -                                           | -      | nose hp        | ova leio; pit ad                                                |
| 228 | RS, Beta2 agonist                       | FN | TP  | TP | -                                           | pan ht | -              | thyr ad; thyr ac; ova leio; mam ac                              |
| 280 | RS, Beta2 agonist                       | FN | TP  | TP | -                                           | -      | -              | ova leio                                                        |
| 288 | RS, Beta2 agonist                       | FN | TP  | TP | lu ; hrt                                    | hrt ht | -              | ova leio; pit ad; pit ac                                        |
| 199 | RS, Beta2-agonist                       | FN | TP  | TP | li                                          | -      | -              | thyr ad                                                         |
| 168 | RS, Corticosteroid                      | TP | TP  | TP | -                                           | -      | mam hp         | mam fad; li ac; br astr; li ad                                  |
| 170 | RS, Corticosteroid                      | TP | TP  | TP | many; tes ;<br>br ; hrt ; kid<br>; pit ; li | li ht  | pan hp; ln hp  | pan ad; pan ac; bo most; li ad; li ac;<br>li ac; mam ad; mam ac |
| 227 | RS, Corticosteroid                      | FN | TP  | TP | -                                           | -      | -              | islet tu; adr bpha; skin sar                                    |
| 11  | RS, Histamine H1 antagonist             | TN | TN  | TN | -                                           | -      | -              | -                                                               |
| 12  | RS, Histamine H1 antagonist             | TN | TN  | TN | li ; lu ; hrt ;<br>kid ; tes                | li ht  | -              | -                                                               |
| 154 | RS, Histamine H1 antagonist             | FP | TN  | TN | -                                           | -      | mam hp         | -                                                               |
| 155 | RS, Histamine H1 antagonist             | FP | TN  | TN | li                                          | li ht  | pan hp         | -                                                               |

|     |                                                |    |     |    |                       |        |         |                        |
|-----|------------------------------------------------|----|-----|----|-----------------------|--------|---------|------------------------|
| 195 | RS, Histamine H1 antagonist                    | FN | TN  | TN | li ; kid              | -      | -       | adr bpha               |
| 207 | RS, Histamine H1 antagonist                    | FN | TN  | TN | -                     | li ht  | -       | thyr ad; pit ac; li ac |
| 67  | RS, HistamineH1 antagonist                     | TN | TN  | TN | -                     | li ht  | -       | -                      |
| 184 | RS, remaining, antifibrotic                    | TP | NC  | TN | -                     | adr ht | adr hp  | li ad; ut ac           |
| 82  | RS, remaining, Leukotriene receptor a          | TN | TN  | TN | -                     | -      | -       | -                      |
| 116 | RS, remaining, Mast cell stabilisor            | TN | TN  | TN | -                     | -      | -       | -                      |
| 264 | RS, remaining, Methylxanthine-derivate         | FN | TN  | TN | li                    | -      | -       | tes tu; mam fad        |
| 31  | UB, Anticholinergic                            | TN | TN  | TN | -                     | -      | -       | -                      |
| 51  | UB, Anticholinergic                            | TN | TN  | TN | -                     | -      | 0       | -                      |
| 268 | UB, Anticholinergic                            | FN | TN  | TN | -                     | li ht  | -       | ut polyp; kid pap      |
| 283 | UB, Anticholinergic                            | FN | TN  | TN | -                     | -      | -       | kid sar                |
| 287 | UB, Anticholinergic                            | FN | TN  | TN | -                     | -      | -       | skin sar               |
| 125 | UB, Anticholinergic and calcium antagoni       | TN | TN  | TN | thyr ; adr ; ova ; li | -      | -       | -                      |
| 153 | UB, remaining xanthine oxidase inhibito        | FP | TN* | TN | -                     | -      | thyr hp | -                      |
| 79  | UB, remaining,oral Beta 3 agonist              | TN | TN* | TN | -                     | li ht  | -       | -                      |
| 62  | ZZ, remaining, CFTR potentiator                | TN | TN* | TN | -                     | -      | -       | -                      |
| 39  | ZZ, Remaining, Prostaglandin E2                | TN | TN* | TN | -                     | -      | -       | -                      |
| 109 | ZZ, remaining, protein kinase C-beta inhibitor | TN | TN* | TN | -                     | -      | -       | -                      |
| 196 | ZZ, Remaining, retinoid, topical, keratinocyte | FN | TN* | TN | pit ; adr             | -      | -       | adr bpha; thyr ad      |
