# Supplementary material for: Prediction of the Carcinogenic Potential of Human Pharmaceuticals Using Repeated Dose Toxicity Data and Their Pharmacological Properties
Source: PubMed Central journal article supplement (PMC5063850; doi:10.3389/fmed.2016.00045), 2016-10-14
Supplement: table_3.pdf [file table_3.pdf]

**Table S3 (Supplementary Material) Summary of the observations in the sub-chronic and carcinogenicity studies, sorted by Histopathological categories**

| #   | Mode of Action                         | Cat. His | Cat. Ph. | Fin. cat. | Weight                                                       | Sub-chronic    |    | Carcinogenicity                                |
|-----|----------------------------------------|----------|----------|-----------|--------------------------------------------------------------|----------------|----|------------------------------------------------|
|     |                                        |          |          |           |                                                              | HT             | HP |                                                |
| 231 | AB, Fluoroquinolone                    | FN       | NT       | FN        | col ; kid                                                    | -              | -  | hsyst leu                                      |
| 244 | AB, Fluoroquinolone                    | FN       | NT       | FN        | -                                                            | -              | -  | pan tu                                         |
| 263 | AB, Fluoroquinolone                    | FN       | NT       | FN        | ce ; hrt ; li ; spl ; adr ; ova                              | -              | -  | kid ac                                         |
| 226 | AF, conazole derivative                | FN       | NT       | FN        | li                                                           | li ht          | -  | li ad                                          |
| 236 | AF, conazole derivative                | FN       | NT       | FN        | adr ; li ; hrt ; kid ; thy ; lu ; spl ; pan ; br ; gon ; ova | adr ht         | -  | soft t sar                                     |
| 279 | AF, remaining, allylamine derivative   | FN       | NT       | FN        | hrt ; adr                                                    | -              | -  | tes tu; li ad; li ac                           |
| 206 | AI, COX2-inhibitor                     | FN       | TN       | TN        | li                                                           | -              | -  | li ac                                          |
| 222 | AI, COX2-inhibitor                     | FN       | TN       | TN        | -                                                            | li ht; thyr ht | -  | thyr ad; li ad                                 |
| 260 | AI, NSAID                              | FN       | TN       | TN        | -                                                            | -              | -  | tes ad;                                        |
| 246 | AV, CCR5 receptor antagonist           | FN       | NT       | FN        | -                                                            | thyr ht        | -  | thyr ad                                        |
| 218 | AV, hepatitis B-inhibitor              | FN       | NT       | FN        | -                                                            | -              | -  | pan ad; pan ac; li ad; li ac; Zymgl ca; br gli |
| 234 | BM, remaining, Isoflavone              | FN       | TN*      | TN        | -                                                            | -              | -  | pit ad; li ad                                  |
| 277 | CNS, 5-HT1b/d agonist                  | FN       | TN       | TN        | -                                                            | -              | -  | adr bpha; tes ad                               |
| 220 | CNS, 5HT2 antagonist                   | FN       | NC       | FN        | -                                                            | -              | -  | li ad                                          |
| 239 | CNS, antiepileptic, Na-channel blocker | FN       | TN       | TN        | adr ; pit ; kid ; li                                         | -              | -  | adr bpha                                       |
| 204 | CNS, Benzodiazepine                    | FN       | TN       | TN        | -                                                            | -              | -  | thyr ad; thy lymph; ut schwan                  |
| 248 | CNS, benzodiazepine                    | FN       | TN       | TN        | -                                                            | li ht          | -  | thyr ad                                        |
| 274 | CNS, DA2 agonist                       | FN       | TP       | TP        | adr                                                          | li ht          | -  | tes ad; skin fibr                              |

|     |                                              |    |     |    |                       |                   |   |                                  |
|-----|----------------------------------------------|----|-----|----|-----------------------|-------------------|---|----------------------------------|
| 245 | CNS, DA2 agonist                             | FN | TP  | TP | -                     | -                 | - | tes ad; tes ca                   |
| 265 | CNS, DA2 agonist                             | FN | TP  | TP | -                     | -                 | - | pit ad; ut ac                    |
| 270 | CNS, DA2 agonist                             | FN | TP  | TP | -                     | -                 | - | tes ad                           |
| 273 | CNS, DA2-antagonist                          | FN | TP  | TP | -                     | -                 | - | islet ad; mam ac; pit ad         |
| 205 | CNS, Opioid, mu-agonist                      | FN | TN  | TN | -                     | -                 | - | tes tu; hsyst leu                |
| 230 | CNS, remaining, alpha2-delta agonist         | FN | NC  | FN | -                     | -                 | - | pan ac; pan ad; tes ad; ut polyp |
| 251 | CNS, remaining, antidepressant               | FN | NC  | FN | -                     | li ht;<br>thyr ht | - | thyr ac; mam ca; li ad; li ac    |
| 213 | CNS, remaining, Carbonic anhydrase inhibitor | FN | TP* | TP | -                     | -                 | - | UGT pap                          |
| 217 | CNS, remaining, COMT-inhibitor               | FN | NC  | FN | adr                   | -                 | - | kid ad; kid ac                   |
| 197 | CNS, remaining, melatonin receptor agonist   | FN | TN* | TN | -                     | -                 | - | li ad; li ac                     |
| 223 | CNS, remaining, NMDA-antagonist              | FN | TN* | TN | -                     | -                 | - | tes ad                           |
| 261 | CNS, remaining, nootropic drug               | FN | TN* | TN | -                     | -                 | - | adr bpha                         |
| 250 | CNS, SNRI                                    | FN | TN  | TN | -                     | li ht             | - | thyr ad                          |
| 276 | CNS, SNRI                                    | FN | TN  | TN | kid                   | -                 | - | tes ad                           |
| 262 | CNS, SSRI                                    | FN | TN  | TN | li                    | -                 | - | In lymph                         |
| 208 | CVS, ACE inhibitor                           | FN | TN  | TN | kid ; li              | kid ht            | - | tes tu                           |
| 266 | CVS, ACE inhibitor                           | FN | TN  | TN | -                     | -                 | - | thyr ac                          |
| 271 | CVS, ACE inhibitor                           | FN | TN  | TN | -                     | -                 | - | kid ad                           |
| 285 | CVS, ACE inhibitor                           | FN | TN  | TN | -                     | -                 | - | mam fad                          |
| 233 | CVS, ACE-inhibitor                           | FN | TN  | TN | kid                   | -                 | - | thyr ad; ut polyp                |
| 249 | CVS, Alpha1 agonist                          | FN | TN  | TN | -                     | -                 | - | tes ad                           |
| 278 | CVS, Alpha1 antagonist                       | FN | TP  | TP | br ;li ; kid ;<br>hrt | -                 | - | adr bpha; mam ac                 |
| 289 | CVS, anticoagulant                           | FN | TN  | TN | -                     | -                 | - | pan ad/ca                        |
| 203 | CVS, Beta antagonist                         | FN | TN  | TN | tes ; adr ; li        | -                 | - | pit tu                           |
| 219 | CVS, Beta antagonist                         | FN | TN  | TN | kid                   | -                 | - | skin SCP                         |

|     |                                    |    |     |    |                                          |         |   |                                                      |
|-----|------------------------------------|----|-----|----|------------------------------------------|---------|---|------------------------------------------------------|
| 243 | CVS, Beta antagonist               | FN | TN  | TN | thyr ; li ;<br>adr ; kid                 | -       | - | li ad                                                |
| 255 | CVS, Beta antagonist,              | FN | TN  | TN | -                                        | -       | - | spl bhaem                                            |
| 200 | CVS, Calcium antagonist            | FN | TN  | TN | -                                        | -       | - | ut polyp                                             |
| 235 | CVS, Calcium antagonist            | FN | TN  | TN | -                                        | -       | - | tes ad                                               |
| 237 | CVS, Calcium antagonist            | FN | TN  | TN | ova                                      | -       | - | tes ad                                               |
| 240 | CVS, Calcium antagonist            | FN | TN  | TN | -                                        | adr ht  | - | mam fad; pit ad                                      |
| 256 | CVS, Calcium antagonist            | FN | TN  | TN | -                                        | -       | - | thyr ad; thyr ac                                     |
| 247 | CVS, Calcium antagonist.           | FN | TN  | TN | li ; hrt                                 | -       | - | ut polyp; oral SCC                                   |
| 252 | CVS, Imidazoline agonist           | FN | TN  | TN | -                                        | -       | - | adr tu                                               |
| 229 | CVS, Loop diuretic                 | FN | NC  | FN | -                                        | -       | - | thyr ad; pit ad                                      |
| 253 | CVS, Loop diuretic                 | FN | NC  | FN | -                                        | -       | - | tes ad; ut ac                                        |
| 284 | CVS, Loop diuretic                 | FN | NC  | FN | -                                        | -       | - | kid ac; kid ad                                       |
| 272 | CVS, Na-channel block              | FN | TN  | TN | -                                        | li ht   | - | thyr ad; tes ad; adr bpha; adr bpha                  |
| 209 | CVS, PDE3 inhibitor                | FN | TN  | TN | li ; kid                                 | -       | - | adr bpha                                             |
| 282 | CVS, platelet aggregation inhibito | FN | NC  | FN | -                                        | li ht   | - | thyr ad; adr bpha; ut ac; li ad; ova<br>ad; mam ad   |
| 232 | CVS, remaining, D1/alpha agonist   | FN | TN* | TN | adr ; kid                                | -       | - | pan ad                                               |
| 216 | CVS, remaining, imidazole, PDE-inh | FN | TN* | TN | -                                        | -       | - | adr bpha                                             |
| 225 | CVS, remaining, Quinolone vasodila | FN | TN* | TN | li ; thyr ;<br>adr ; spl ;<br>pros ; tes | -       | - | adr bpha                                             |
| 198 | CVS, remaining, renin inhibitor    | FN | TN* | TN | -                                        | col ht  | - | col ad; col ac                                       |
| 212 | GI, 5HT4 agonist                   | FN | TN  | TN | -                                        | -       | - | tes tu; pit ad                                       |
| 269 | GI, 5HT4-agonist                   | FN | TN  | TN | -                                        | -       | - | thyr ad; mam fad; pan ad; adr bpha;<br>li ad; pit ad |
| 210 | GI, Histamine H2 antagonist        | FN | TN  | TN | li                                       | -       | - | tes ad                                               |
| 275 | GI, Histamine H2 antagonist        | FN | TN  | TN | -                                        | -       | - | skin fibr                                            |
| 259 | GI, Proton pump inhibitor          | FN | TP  | TP | -                                        | stom ht | - | stom tu; stom SCC; li ad                             |

|     |                                              |    |     |    |                               |        |   |                                                         |
|-----|----------------------------------------------|----|-----|----|-------------------------------|--------|---|---------------------------------------------------------|
| 238 | GI, remaining, Sugar alcohol                 | FN | TN* | TN | -                             | li ht  | - | tes tu                                                  |
| 215 | HM, Dual 5 reductase inhibitor.              | FN | TP  | TP | -                             | -      | - | tes ad                                                  |
| 224 | HM, Dual 5-reductase inhibitor               | FN | TP  | TP | -                             | -      | - | thyr ad                                                 |
| 221 | HM, estrogen agonist                         | FN | TP  | TP | -                             | -      | - | pit ad                                                  |
| 281 | HM, estrogen agonist,                        | FN | TP  | TP | -                             | -      | - | li ad; mam ca                                           |
| 254 | HM, GnRH agonist                             | FN | TP  | TP | -                             | -      | - | adr bpha; adr mpha; islet ad; tes ad;<br>pit ad; pit ca |
| 286 | HM, GnRH agonist                             | FN | TP  | TP | -                             | -      | - | pit ad; pit ca                                          |
| 257 | HM, progestagen-estrogen<br>contraceptive.   | FN | TP  | TP | adr ; li                      | -      | - | pit ad; mam ad; mam ac                                  |
| 214 | HM, progesterone antagonist, birth<br>cont   | FN | TP  | TP | li                            | -      | - | li ad; ut ac; mam ac                                    |
| 241 | HM, remaining, aromatase inhibitor           | FN | TP  | TP | -                             | li ht  | - | ova gca; UGT pap                                        |
| 201 | HM, selective estrogen modulator             | FN | TP  | TP | -                             | -      | - | kid ad; kid ac; ova ad                                  |
| 242 | IS, remaining, imidazothiazole<br>derivative | FN | NC  | FN | -                             | -      | - | pit ad                                                  |
| 194 | MB, antidiabetic, alfa-glucosidase inhib     | FN | TN  | TN | -                             | -      | - | tes ad; kid ad; kid ac;                                 |
| 202 | MB, fibrate                                  | FN | TP  | TP | -                             | -      | - | tes tu; adr bpha; li ac                                 |
| 211 | MB, fibrate                                  | FN | TP  | TP | li ; kid ; hrt ;<br>adr ; tes | -      | - | pan ad; stom tu; li ad; li ac                           |
| 267 | MB, HMG-CoA-reductase inhibitor              | FN | TP  | TP | -                             | -      | - | thyr ad; li ac                                          |
| 258 | MB, remaining, Inhib.growth hormone          | FN | TP* | TP | -                             | -      | - | sk sar; ut ac                                           |
| 228 | RS, Beta2 agonist                            | FN | TP  | TP | -                             | pan ht | - | thyr ad; thyr ac; ova leio; mam ac                      |
| 280 | RS, Beta2 agonist                            | FN | TP  | TP | -                             | -      | - | ova leio                                                |
| 288 | RS, Beta2 agonist                            | FN | TP  | TP | lu ; hrt                      | hrt ht | - | ova leio; pit ad; pit ac                                |
| 199 | RS, Beta2-agonist                            | FN | TP  | TP | li                            | -      | - | thyr ad                                                 |
| 227 | RS, Corticosteroid                           | FN | TP  | TP | -                             | -      | - | islet tu; adr bpha; skin sar                            |
| 195 | RS, Histamine H1 antagonist                  | FN | TN  | TN | li ; kid                      | -      | - | adr bpha                                                |
| 207 | RS, Histamine H1 antagonist                  | FN | TN  | TN | -                             | li ht  | - | thyr ad; pit ac; li ac                                  |
| 264 | RS, remaining, Methylxanthine-derivate       | FN | TN  | TN | li                            | -      | - | tes tu; mam fad                                         |

|     |                                                |    |     |    |                       |                  |                         |                   |
|-----|------------------------------------------------|----|-----|----|-----------------------|------------------|-------------------------|-------------------|
| 268 | UB, Anticholinergic                            | FN | TN  | TN | -                     | li ht            | -                       | ut polyp; kid pap |
| 283 | UB, Anticholinergic                            | FN | TN  | TN | -                     | -                | -                       | kid sar           |
| 287 | UB, Anticholinergic                            | FN | TN  | TN | -                     | -                | -                       | skin sar          |
| 196 | ZZ, Remaining, retinoid, topical, keratinocyte | FN | TN* | TN | pit ; adr             | -                | -                       | adr bpha; thyr ad |
| 158 | AB, remaining, bactericidal                    | FP | NT  | FP | li ; spl ; kid ; thyr | -                | stom hp; ut hp; stom hp | -                 |
| 157 | CNS, SSRI                                      | FP | TN  | TN | -                     | li ht            | li hp                   | -                 |
| 159 | CVS, Alpha1 agonist                            | FP | TN  | TN | -                     | -                | mam hp                  | -                 |
| 144 | CVS, Alpha1 antagonist                         | FP | TP  | TP | -                     | -                | mam hp                  | -                 |
| 161 | CVS, Alpha1 antagonist and 5-HT1A              | FP | TN  | TP | -                     | -                | bm hp                   | -                 |
| 145 | CVS, Alpha2 agonist                            | FP | TN  | TN | -                     | -                | thy hp                  | -                 |
| 149 | CVS, Alpha2 agonist                            | FP | TN  | TN | -                     | -                | islet hp                | -                 |
| 156 | CVS, Angiotensin II antagonist                 | FP | TN  | TN | -                     | -                | kid hp                  | -                 |
| 162 | CVS, Angiotensin II antagonist                 | FP | TN  | TN | -                     | kid ht           | kid hp                  | -                 |
| 147 | CVS, Beta antagonist                           | FP | TN  | TN | -                     | adr ht           | thyr hp                 | -                 |
| 148 | CVS, Beta antagonist /alpha-1 blocker          | FP | TN  | TN | li                    | -                | li hp                   | -                 |
| 150 | IS, Immunosuppressive                          | FP | TP  | TP | -                     | -                | ln hp                   | -                 |
| 152 | IS, Immunosuppressive, mTOR inhibitor          | FP | TP  | TP | -                     | stom ht; thyr ht | stom hp                 | -                 |
| 151 | MB, Antidiabetic, remaining, SGLT-2 inhibitor  | FP | TN* | TN | -                     | kid ht           | kid hp                  | -                 |
| 146 | MB, HMG-CoA reductase inhibitor                | FP | TP  | TP | -                     | -                | li hp                   | -                 |
| 160 | MB, remaining, 3 beta-hydroxysteroid de        | FP | TN* | TN | -                     | adr ht           | adr hp                  | -                 |
| 154 | RS, Histamine H1 antagonist                    | FP | TN  | TN | -                     | -                | mam hp                  | -                 |
| 155 | RS, Histamine H1 antagonist                    | FP | TN  | TN | li                    | li ht            | pan hp                  | -                 |
| 153 | UB, remaining xanthine oxidase inhibito        | FP | TN* | TN | -                     | -                | thyr hp                 | -                 |
| 2   | AF, remaining, benzimidazole                   | TN | NT  | TN | -                     | -                | -                       | -                 |

|     |                                    |    |     |    |                    |       |   |   |
|-----|------------------------------------|----|-----|----|--------------------|-------|---|---|
| 108 | AI, COX2 inhibitor                 | TN | TN  | TN | -                  | -     | - | - |
| 72  | AI, COX2-inhibitor                 | TN | TN  | TN | -                  | -     | - | - |
| 44  | AI, NSAID                          | TN | TN  | TN | kid                | -     | - | - |
| 45  | AI, NSAID                          | TN | TN  | TN | -                  | -     | - | - |
| 50  | AI, NSAID                          | TN | TN  | TN | kid ; spl          | -     | - | - |
| 64  | AI, NSAID                          | TN | TN  | TN | -                  | -     | - | - |
| 74  | AI, NSAID                          | TN | TN  | TN | -                  | -     | - | - |
| 83  | AI, NSAID                          | TN | TN  | TN | li ; kid           | -     | - | - |
| 91  | AI, NSAID                          | TN | TN  | TN | hrt ; adr ;<br>kid | -     | - | - |
| 124 | AI, NSAID                          | TN | TN  | TN | -                  | -     | - | - |
| 129 | AI, NSAID                          | TN | TN  | TN | -                  | -     | - | - |
| 71  | AI, NSAID,                         | TN | TN  | TN | -                  | -     | - | - |
| 7   | AI, remaining,                     | TN | TN* | TN | li;                | -     | - | - |
| 122 | AI, remaining, cytokine-modulat    | TN | TN* | TN | -                  | -     | - | - |
| 73  | AM, remaining, antimalarial        | TN | NT  | TN | -                  | -     | - | - |
| 97  | AM, remaining, Antiparasite.       | TN | NT  | TN | -                  | -     | - | - |
| 123 | AV,                                | TN | NT  | TN | -                  | -     | - | - |
| 135 | AV, herpes genitalis               | TN | NT  | TN | -                  | -     | - | - |
| 60  | AV, immunostimulant                | TN | NT  | TN | li ; kid ; adr     | -     | - | - |
| 104 | AV, Nucleoside inhibitor           | TN | NT  | TN | -                  | -     | - | - |
| 18  | AV, protease inhibitor             | TN | NT  | TN | -                  | -     | - | - |
| 55  | AV, viral DNA polymerase inhibitor | TN | NT  | TN | -                  | -     | - | - |
| 3   | BM, bisphosphonate                 | TN | TN  | TN | -                  | -     | - | - |
| 33  | BM, bisphosphonate                 | TN | TN  | TN | -                  | -     | - | - |
| 87  | BM, Bisphosphonate,                | TN | TN  | TN | thyr ;<br>parath   | bo ht | - | - |
| 28  | BM, remaining, calcium-mimetic     | TN | TN* | TN | -                  | -     | - | - |

|     |                                               |    |     |    |                                        |                   |   |   |
|-----|-----------------------------------------------|----|-----|----|----------------------------------------|-------------------|---|---|
| 4   | CNS, 5-HT1b/d agonist                         | TN | TN  | TN | -                                      | thyr ht;<br>li ht | - | - |
| 107 | CNS, 5-HT1b/d agonist,                        | TN | TN  | TN | -                                      | -                 | - | - |
| 95  | CNS, 5-HT3 antagonist                         | TN | TN  | TN | -                                      | -                 | - | - |
| 24  | CNS, antiepileptic, Na-channel blocker        | TN | TN  | TN | -                                      | li ht             | - | - |
| 49  | CNS, antiepileptic, Na-channel blocker        | TN | TN  | TN | -                                      | -                 | - | - |
| 65  | CNS, antiepileptic, Na-channel blocker        | TN | TN  | TN | -                                      | li ht             | - | - |
| 66  | CNS, antiepileptic, Na-channel blocker        | TN | TN  | TN | -                                      | li ht             | - | - |
| 5   | CNS, Benzodiazepine                           | TN | TN  | TN | -                                      | -                 | - | - |
| 142 | CNS, benzodiazepine-like hypnotic             | TN | TN  | TN | -                                      | -                 | - | - |
| 143 | CNS, benzodiazepine-like hypnotic             | TN | TN  | TN | spl ; li ; kid ;<br>tes ; hrt ;<br>pit | li ht             | - | - |
| 59  | CNS, DA2-antagonist/5HT antagonist            | TN | TP  | TP | -                                      | -                 | - | - |
| 84  | CNS, Opioid, mu-agonist                       | TN | TN  | TN | -                                      | -                 | - | - |
| 132 | CNS, Opioid, mu-agonist,<br>anticholinergic   | TN | TN  | TN | -                                      | -                 | - | - |
| 85  | CNS, Opioid, mu-antagonist                    | TN | TN  | TN | -                                      | -                 | - | - |
| 86  | CNS, Opioid, mu-antagonist                    | TN | TN  | TN | -                                      | -                 | - | - |
| 75  | CNS, Opioid, remaining, kappa agonist         | TN | TN* | TN | -                                      | -                 | - | - |
| 22  | CNS, remaining 5HT, 5-HT1-agonist             | TN | TN* | TN | -                                      | -                 | - | - |
| 56  | CNS, remaining, acetylcholinesterase<br>inhib | TN | TN* | TN | -                                      | sgl ht            | - | - |
| 96  | CNS, remaining, AMPA Glutamate<br>antagonist  | TN | TN* | TN | -                                      | -                 | - | - |
| 106 | CNS, remaining, cannabinoid antagonist        | TN | TN* | TN | -                                      | -                 | - | - |
| 20  | CNS, remaining, DA-NA uptake inhibitor        | TN | TN* | TN | li ; adr ;<br>thyr                     | li ht             | - | - |
| 118 | CNS, remaining, GABA-enhancer                 | TN | TN* | TN | -                                      | -                 | - | - |
| 138 | CNS, remaining, GABA-metab. inhib             | TN | TN* | TN | -                                      | -                 | - | - |

|     |                                  |    |     |    |                                                            |        |   |   |
|-----|----------------------------------|----|-----|----|------------------------------------------------------------|--------|---|---|
| 81  | CNS, remaining, MAO-A inhibitor  | TN | TN* | TN | lu ; kid ;<br>thyr ; tes ;<br>ova                          | -      | - | - |
| 102 | CNS, remaining, MAO-B inhibitor  | TN | TN* | TN | -                                                          | li ht  | - | - |
| 136 | CNS, Remaining, Nicotine agonist | TN | TN* | TN | -                                                          | -      | - | - |
| 103 | CNS, SNRI                        | TN | TN  | TN | -                                                          | -      | - | - |
| 137 | CNS, SNRI                        | TN | TN  | TN | -                                                          | -      | - | - |
| 29  | CNS, SSRI                        | TN | TN  | TN | -                                                          | -      | - | - |
| 54  | CNS, SSRI                        | TN | TN  | TN | -                                                          | -      | - | - |
| 112 | CNS, SSRI                        | TN | TN  | TN | kid                                                        | li ht  | - | - |
| 88  | CNS, SSRI, 5-HT antagonist       | TN | TN  | TN | -                                                          | -      | - | - |
| 15  | CVS, ACE inhibitor               | TN | TN  | TN | -                                                          | -      | - | - |
| 69  | CVS, ACE inhibitor               | TN | TN  | TN | -                                                          | -      | - | - |
| 117 | CVS, ACE inhibitor               | TN | TN  | TN | kid                                                        | kid ht | - | - |
| 19  | CVS, Alpha1 antagonist           | TN | TP  | TP | kid ; br ; tes                                             | -      | - | - |
| 34  | CVS, Alpha1 antagonist           | TN | TP  | TP | -                                                          | -      | - | - |
| 133 | CVS, Alpha1 antagonist           | TN | TP  | TP | -                                                          | -      | - | - |
| 13  | CVS, Angiotensin II antagonist   | TN | TN  | TN | -                                                          | -      | - | - |
| 23  | CVS, Angiotensin II antagonist   | TN | TN  | TN | -                                                          | kid ht | - | - |
| 40  | CVS, Angiotensin II antagonist   | TN | TN  | TN | -                                                          | -      | - | - |
| 10  | CVS, anticoagulant               | TN | TN  | TN | -                                                          | -      | - | - |
| 14  | CVS, Beta antagonist             | TN | TN  | TN | -                                                          | -      | - | - |
| 16  | CVS, Beta antagonist             | TN | TN  | TN | -                                                          | -      | - | - |
| 17  | CVS, Beta antagonist             | TN | TN  | TN | hrt ; li                                                   | -      | - | - |
| 25  | CVS, Beta antagonist             | TN | TN  | TN | pit ; lu ; hrt<br>; spl ; kid ;<br>adr ; tes ;<br>ova ; br | -      | - | - |
| 26  | CVS, Beta antagonist             | TN | TN  | TN | -                                                          | -      | - | - |
| 126 | CVS, Beta antagonist             | TN | TN  | TN | -                                                          | -      | - | - |



|     |                                    |    |     |    |                                                      |                                        |                   |   |
|-----|------------------------------------|----|-----|----|------------------------------------------------------|----------------------------------------|-------------------|---|
| 127 | CVS, Beta antagonist               | TN | TN  | TN | -                                                    | -                                      | -                 | - |
| 9   | CVS, Calcium antagonist            | TN | TN  | TN | hrt ; kid                                            | adr ht                                 | -                 | - |
| 90  | CVS, Calcium antagonist            | TN | TN  | TN | spl ; kid ;<br>ova ; hrt ; li<br>; adr ; br          | -                                      | -                 | - |
| 92  | CVS, Calcium antagonist            | TN | TN  | TN | -                                                    | -                                      | -                 | - |
| 93  | CVS, Calcium antagonist            | TN | TN  | TN | -                                                    | -                                      | -                 | - |
| 38  | CVS, class 1C antiarrhythmic       | TN | TN  | TN | thyr ; li                                            | -                                      | -                 | - |
| 53  | CVS, class 1C antiarrhythmic       | TN | TN  | TN | hrt ; li                                             | -                                      | -                 | - |
| 6   | CVS, endothelin antagonist         | TN | TN  | TN | -                                                    | li ht; int<br>ht; adr<br>ht; mam<br>ht | nose hp;<br>bm hp | - |
| 115 | CVS, endothelin antagonist         | TN | TN  | TN | -                                                    | -                                      | -                 | - |
| 105 | CVS, Imidazoline agonist           | TN | TN  | TN | adr ; tes                                            | -                                      | -                 | - |
| 98  | CVS, Loop diuretic                 | TN | NC  | TN | -                                                    | -                                      | -                 | - |
| 100 | CVS, Na-channel block              | TN | TN  | TN | -                                                    | -                                      | -                 | - |
| 101 | CVS, Na-channel block              | TN | TN  | TN | -                                                    | li ht                                  | -                 | - |
| 77  | CVS, PDE3 inhibitor                | TN | TN  | TN | adr                                                  | -                                      | -                 | - |
| 99  | CVS, platelet aggregation inhibito | TN | NC  | TN | -                                                    | li ht;<br>thyr ht                      | -                 | - |
| 63  | CVS, remaining, 5-HT2 antagonist   | TN | TN* | TN | spl ; li ; kid ;<br>hrt ; pan ;<br>br ; thy ;<br>adr | -                                      | -                 | - |
| 141 | CVS, remaining, B1 partial agonist | TN | TN* | TN | -                                                    | -                                      | -                 | - |
| 36  | CVS, remaining, hemostatic         | TN | TN* | TN | -                                                    | -                                      | -                 | - |
| 89  | CVS, remaining, Nitr/K+ATP agonist | TN | TN* | TN | -                                                    | -                                      | -                 | - |
| 113 | CVS, remaining, PDE5-inhibitor     | TN | TN* | TN | -                                                    | li ht;<br>thyr ht                      | -                 | - |

|     |                                             |    |     |    |                                       |                   |   |   |
|-----|---------------------------------------------|----|-----|----|---------------------------------------|-------------------|---|---|
| 78  | CVS, remaining, vasodilator                 | TN | TN* | TN | -                                     | hrt ht            | - | - |
| 110 | CVS, vasopressin-2 agonist                  | TN | TN  | TN | -                                     | -                 | - | - |
| 131 | CVS, vasopressin-2 agonist                  | TN | TN  | TN | -                                     | -                 | - | - |
| 121 | GI, 5HT4-agonist                            | TN | TN  | TN | -                                     | -                 | - | - |
| 48  | GI, Histamine H2 antagonist                 | TN | TN  | TN | br ; hrt ; kid<br>; tes ; li ;<br>ova | -                 | - | - |
| 94  | GI, Histamine H2 antagonist                 | TN | TN  | TN | li ; kid                              | -                 | - | - |
| 41  | GI, Proton pump inhibitor                   | TN | TP  | TP | -                                     | -                 | - | - |
| 119 | GI, remaining, anti-osteoporose agent       | TN | TN* | TN | -                                     | -                 | - | - |
| 32  | GI, remaining, Fe-chelator                  | TN | TN* | TN | -                                     | -                 | - | - |
| 70  | GI, remaining, Opioid, mu-agonist           | TN | TN* | TN | -                                     | -                 | - | - |
| 30  | GI, remaining, Phosphate binder             | TN | TN* | TN | -                                     | -                 | - | - |
| 80  | GI, remaining, Synthetisch<br>prostaglandin | TN | TN* | TN | adr ; li                              | -                 | - | - |
| 21  | HM, GnRH agonist                            | TN | TP  | TP | -                                     | -                 | - | - |
| 42  | HM, progestagen-estrogen<br>contraceptive   | TN | TP  | TP | pit ; thyr                            | -                 | - | - |
| 120 | IS, Immunosuppressive                       | TN | TP  | TP | -                                     | -                 | - | - |
| 140 | IS, Immunosuppressive                       | TN | TP  | TP | -                                     | -                 | - | - |
| 47  | IS, Immunosuppressive, mTOR inhibitor       | TN | TP  | TP | -                                     | thyr ht           | - | - |
| 52  | IS, Immunosuppressive, S1P antagonist       | TN | TP  | TP | -                                     | -                 | - | - |
| 8   | IS, remaining                               | TN | NC  | TN | -                                     | -                 | - | - |
| 76  | MB, antidiabetic, alfa-glucosidase inhib    | TN | TN  | TN | -                                     | -                 | - | - |
| 68  | MB, antidiabetic, DPP4 inhibitor            | TN | TN  | TN | -                                     | thyr ht;<br>li ht | - | - |
| 111 | MB, antidiabetic, DPP4 inhibitor            | TN | TN  | TN | -                                     | -                 | - | - |
| 114 | MB, antidiabetic, DPP4 inhibitor            | TN | TN  | TN | -                                     | -                 | - | - |
| 139 | MB, antidiabetic, DPP4 inhibitor            | TN | TN  | TN | -                                     | -                 | - | - |
| 134 | MB, antidiabetic, remaining, PPAR-          | TN | TP* | TP | hrt ; li                              | li ht             | - | - |

|     |                                                |    |     |    |                              |       |                                            |   |
|-----|------------------------------------------------|----|-----|----|------------------------------|-------|--------------------------------------------|---|
|     | gamma                                          |    |     |    |                              |       |                                            |   |
| 58  | MB, Antidiabetic, remaining, SU derivative     | TN | TN* | TN | -                            | -     | -                                          | - |
| 46  | MB, fibrate                                    | TN | TP  | TP | -                            | -     | -                                          | - |
| 27  | MB, HMG-CoA reductase inhibitor                | TN | TP  | TP | -                            | -     | -                                          | - |
| 130 | MB, remaining, Aldose reductase inhibit        | TN | TN* | TN | -                            | -     | -                                          | - |
| 43  | MB, remaining, hypertriglyceridemia            | TN | TN* | TN | -                            | -     | -                                          | - |
| 57  | MB, remaining, lipid replacement               | TN | TN* | TN | -                            | -     | -                                          | - |
| 1   | MB, remaining, nicotinic acid derived,         | TN | TN* | TN | -                            | -     | -                                          | - |
| 61  | RS, Anticholinergic                            | TN | TN  | TN | -                            | -     | -                                          | - |
| 128 | RS, Anticholinergic                            | TN | TN  | TN | -                            | -     | -                                          | - |
| 11  | RS, Histamine H1 antagonist                    | TN | TN  | TN | -                            | -     | -                                          | - |
| 12  | RS, Histamine H1 antagonist                    | TN | TN  | TN | li ; lu ; hrt ;<br>kid ; tes | li ht | -                                          | - |
| 67  | RS, HistamineH1 antagonist                     | TN | TN  | TN | -                            | li ht | -                                          | - |
| 82  | RS, remaining, Leukotriene receptor a          | TN | TN  | TN | -                            | -     | -                                          | - |
| 116 | RS, remaining, Mast cell stabilisor            | TN | TN  | TN | -                            | -     | -                                          | - |
| 51  | UB, Anticholinergic                            | TN | TN  | TN | -                            | -     | tes tu; br<br>astr; skin<br>mel; mam<br>ac | - |
| 125 | UB, Anticholinergic and calcium antagoni       | TN | TN  | TN | thyr ; adr ;<br>ova ; li     | -     | -                                          | - |
| 79  | UB, remaining,oral Beta 3 agonist              | TN | TN* | TN | -                            | li ht | -                                          | - |
| 62  | ZZ, remaining, CFTR potentiator                | TN | TN* | TN | -                            | -     | -                                          | - |
| 39  | ZZ, Remaining, Prostaglandin E2                | TN | TN* | TN | -                            | -     | -                                          | - |
| 109 | ZZ, remaining, protein kinase C-beta inhibitor | TN | TN* | TN | -                            | -     | -                                          | - |
| 35  | CNS, SSRI                                      | TN | TN  | TN | -                            | -     | -                                          | - |
| 37  | CVS, ACE inhibitor                             | TN | TN  | TN | -                            | -     | -                                          | - |

|     |                                        |    |     |    |                                        |                    |                   |                                                      |
|-----|----------------------------------------|----|-----|----|----------------------------------------|--------------------|-------------------|------------------------------------------------------|
| 31  | UB, Anticholinergic                    | TN | TN  | TN | -                                      | -                  | -                 | -                                                    |
| 182 | AF, conazole derivative                | TP | NT  | TP | li ; kid ; spl ;<br>br ; ova ;<br>thyr | -                  | thyr hp           | tes tu; br astr; skin mel; mam ac                    |
| 164 | AI, NSAID                              | TP | TN  | TN | -                                      | -                  | kid hp; UGT<br>hp | adr bpha                                             |
| 171 | AV, Guanosine analogue                 | TP | NT  | TP | -                                      | pit ht             | tes hp            | mam ac; skin sar                                     |
| 189 | AV, protease inhibitor                 | TP | NT  | TP | -                                      | thyr ht            | li hp; kid hp     | adr bpha                                             |
| 181 | CNS, 5-HT1b/d agonist,                 | TP | TN  | TN | kid                                    | -                  | epi hp; tes<br>hp | thyr ad; pit ad; thy bthym                           |
|     | CNS, 5-HT2 antagonist                  | TP | NC  | TP | li                                     | thyr ht;<br>mam ht | mam hp            | thyr ad; mam ac                                      |
| 176 | CNS, 5-HT3 antagonist                  | TP | TN  | TN | -                                      | -                  | -                 | li ad; li ac                                         |
| 183 | CNS, antiepileptic, Na-channel blocker | TP | TN  | TN | kid ; adr                              | li ht              | kid hp            | li ac                                                |
| 163 | CNS, DA2-antagonist, Benzamide,        | TP | TP  | TP | -                                      | -                  | mam hp            | pan ad; pan ac; adr bpha; mam ca;<br>pit ca          |
| 188 | CNS, DA2-antagonist, DA3 antagonist    | TP | TP  | TP | li                                     | -                  | lu hp             | mam ca                                               |
| 177 | CNS, remaining, Electron transporter   | TP | TP* | TP | -                                      | -                  | stom hp           | Squamous cell and basal carcinomas                   |
| 174 | CVS, ACE inhibitor                     | TP | TN  | TN | thyr                                   | -                  | kid hp            | pit ad; br ac; mes lip; pit ac                       |
| 186 | CVS, ACE inhibitor                     | TP | TN  | TN | -                                      | kid ht             | kid hp            | In bhaem                                             |
| 192 | CVS, Alpha1 antagonist                 | TP | TP  | TP | -                                      | li ht; vag<br>ht   | li hp; mam<br>hp  | thyr ad; thyr ac                                     |
| 193 | CVS, Alpha1 antagonist                 | TP | TP  | TP | -                                      | -                  | mam hp            | mam ad; hsyst leu                                    |
| 167 | CVS, Alpha2 agonist, indicatie ocular  | TP | TN  | TN | -                                      | int ht             | int hp            | pan ac; thyr ad; mam ad                              |
| 165 | CVS, Calcium antagonist                | TP | TN  | TN | li                                     | li ht              | In hp; thyr<br>hp | thyr ad                                              |
| 172 | CVS, Calcium antagonist                | TP | TN  | TN | -                                      | -                  | col hp            | mam fad; adr bpha; tes ad; pit ad;<br>mam ac; pit ca |
| 169 | CVS, remaining, Hydrazinophthalzine    | TP | TP* | TP | -                                      | pit ht             | thyr hp;          | thyr ad; thyr ac                                     |

|     |                                  |    |    |    |                                             |                                         |                   |                                                                 |
|-----|----------------------------------|----|----|----|---------------------------------------------|-----------------------------------------|-------------------|-----------------------------------------------------------------|
| 178 | GI, Proton pump inhibitor        | TP | TP | TP | li ; li ; lu ;<br>stom                      | li ht;<br>stom ht;<br>stom ht           | stom hp           | tes ad; tes ad                                                  |
| 187 | GI, Proton pump inhibitor        | TP | TP | TP | li ; kid ;<br>stom ; thyr<br>; hrt ; spl    | li ht;<br>stom ht;<br>thyr ht           | stom hp           | adr bpha; tes ad; stom SCP; stom<br>SCC; hsyst leu; pit ad      |
| 175 | HM, GnRH agonist                 | TP | TP | TP | -                                           | -                                       | tes hp            | pit ad                                                          |
| 180 | HM, GnRH agonist                 | TP | TP | TP | br                                          | pit ht                                  | pit hp            | pit ad                                                          |
| 166 | HM, remaining, antiandrogen,     | TP | TP | TP | tes ; adr                                   | li ht; ova<br>ht; adr<br>ht; thyr<br>ht | tes hp; ova<br>hp | te ad; thyr ad; ut ac                                           |
| 179 | HM, selective estrogen modulator | TP | TP | TP | -                                           | -                                       | ova hp            | kid ac; ova ad                                                  |
| 190 | MB, HMG-CoA reductase inhibitor  | TP | TP | TP | -                                           | li ht                                   | li hp; stom<br>hp | ut polyp                                                        |
| 173 | MB, HMG-CoA-reductase inhibitor  | TP | TP | TP | thyr                                        | -                                       | stom hp           | stom SCP; thyr ac; thyr ad                                      |
| 191 | RS, Beta2 agonist                | TP | TP | TP | -                                           | -                                       | nose hp           | ova leio; pit ad                                                |
| 168 | RS, Corticosteroid               | TP | TP | TP | -                                           | -                                       | mam hp            | mam fad; li ac; br astr; li ad                                  |
| 170 | RS, Corticosteroid               | TP | TP | TP | many; tes ;<br>br ; hrt ; kid<br>; pit ; li | li ht                                   | pan hp; ln<br>hp  | pan ad; pan ac; bo most; li ad; li ac;<br>li ac; mam ad; mam ac |
| 184 | RS, remaining, antifibrotic      | TP | NC | TN | -                                           | adr ht                                  | adr hp            | li ad; ut ac                                                    |
