# Supplementary material for: Prediction of the Carcinogenic Potential of Human Pharmaceuticals Using Repeated Dose Toxicity Data and Their Pharmacological Properties
Source: PubMed Central journal article supplement (PMC5063850; doi:10.3389/fmed.2016.00045), 2016-10-14
Supplement: table_4.pdf [file table_4.pdf]

**Table S4 (Supplementary Material) Summary of the observations in the sub-chronic and carcinogenicity studies, sorted by Pharmacological Categories**

| #   | Mode of Action                            | Cat. His | Cat. Ph. | Fin. cat. | Weight                                | Sub-chronic        |        | Carcinogenicity                                    |
|-----|-------------------------------------------|----------|----------|-----------|---------------------------------------|--------------------|--------|----------------------------------------------------|
|     |                                           |          |          |           |                                       | HT                 | HP     |                                                    |
| 220 | CNS, 5HT2 antagonist                      | FN       | NC       | FN        | -                                     | -                  | -      | li ad                                              |
| 230 | CNS, remaining, alpha2-delta agonist      | FN       | NC       | FN        | -                                     | -                  | -      | pan ac; pan ad; tes ad; ut polyp                   |
| 251 | CNS, remaining, antidepressant            | FN       | NC       | FN        | -                                     | li ht;<br>thyr ht  | -      | thyr ac; mam ca; li ad; li ac                      |
| 217 | CNS, remaining, COMT-inhibitor            | FN       | NC       | FN        | adr                                   | -                  | -      | kid ad; kid ac                                     |
| 229 | CVS, Loop diuretic                        | FN       | NC       | FN        | -                                     | -                  | -      | thyr ad; pit ad                                    |
| 253 | CVS, Loop diuretic                        | FN       | NC       | FN        | -                                     | -                  | -      | tes ad; ut ac                                      |
| 284 | CVS, Loop diuretic                        | FN       | NC       | FN        | -                                     | -                  | -      | kid ac; kid ad                                     |
| 282 | CVS, platelet aggregation inhibitor       | FN       | NC       | FN        | -                                     | li ht              | -      | thyr ad; adr bpha; ut ac; li ad; ova ad;<br>mam ad |
| 242 | IS, remaining, imidazothiazole derivative | FN       | NC       | FN        | -                                     | -                  | -      | pit ad                                             |
| 98  | CVS, Loop diuretic                        | TN       | NC       | TN        | -                                     | -                  | -      | -                                                  |
| 99  | CVS, platelet aggregation inhibitor       | TN       | NC       | TN        | -                                     | li ht;<br>thyr ht  | -      | -                                                  |
| 8   | IS, remaining                             | TN       | NC       | TN        | -                                     | -                  | -      | -                                                  |
| 185 | CNS, 5-HT2 antagonist                     | TP       | NC       | TP        | li                                    | thyr ht;<br>mam ht | mam hp | thyr ad; mam ac                                    |
| 184 | RS, remaining, antifibrotic               | TP       | NC       | TN        | -                                     | adr ht             | adr hp | li ad; ut ac                                       |
| 231 | AB, Fluoroquinolone                       | FN       | NT       | FN        | col ; kid                             | -                  | -      | hsyst leu                                          |
| 244 | AB, Fluoroquinolone                       | FN       | NT       | FN        | -                                     | -                  | -      | pan tu                                             |
| 263 | AB, Fluoroquinolone                       | FN       | NT       | FN        | ce ; hrt ; li<br>; spl ; adr<br>; ova | -                  | -      | kid ac                                             |
| 226 | AF, conazole derivative                   | FN       | NT       | FN        | li                                    | li ht              | -      | li ad                                              |

|     |                                      |    |    |    |                                                                             |         |                               |                                                   |
|-----|--------------------------------------|----|----|----|-----------------------------------------------------------------------------|---------|-------------------------------|---------------------------------------------------|
| 236 | AF, conazole derivative              | FN | NT | FN | adr ; li ;<br>hrt ; kid ;<br>thy ; lu ;<br>spl ; pan ;<br>br ; gon ;<br>ova | adr ht  | -                             | soft t sar                                        |
| 279 | AF, remaining, allylamine derivative | FN | NT | FN | hrt ; adr                                                                   | -       | -                             | tes tu; li ad; li ac                              |
| 246 | AV, CCR5 receptor antagonist         | FN | NT | FN | -                                                                           | thyr ht | -                             | thyr ad                                           |
| 218 | AV, hepatitis B-inhibitor            | FN | NT | FN | -                                                                           | -       | -                             | pan ad; pan ac; li ad; li ac; Zymgl ca;<br>br gli |
| 158 | AB, remaining, bactericidal          | FP | NT | FP | li ; spl ;<br>kid ; thyr                                                    | -       | stom hp;<br>ut hp;<br>stom hp | -                                                 |
| 2   | AF, remaining, benzimidazole         | TN | NT | TN | -                                                                           | -       | -                             | -                                                 |
| 73  | AM, remaining, antimalarial          | TN | NT | TN | -                                                                           | -       | -                             | -                                                 |
| 97  | AM, remaining, Antiparasite.         | TN | NT | TN | -                                                                           | -       | -                             | -                                                 |
| 123 | AV,                                  | TN | NT | TN | -                                                                           | -       | -                             | -                                                 |
| 135 | AV, herpes genitalis                 | TN | NT | TN | -                                                                           | -       | -                             | -                                                 |
| 60  | AV, immunostimulant                  | TN | NT | TN | li ; kid ;<br>adr                                                           | -       | -                             | -                                                 |
| 104 | AV, Nucleoside inhibitor             | TN | NT | TN | -                                                                           | -       | -                             | -                                                 |
| 18  | AV, protease inhibitor               | TN | NT | TN | -                                                                           | -       | -                             | -                                                 |
| 55  | AV, viral DNA polymerase inhibitor   | TN | NT | TN | -                                                                           | -       | -                             | -                                                 |
| 182 | AF, conazole derivative              | TP | NT | TP | li ; kid ;<br>spl ; br ;<br>ova ; thyr                                      | -       | thyr hp                       | tes tu; br astr; skin mel; mam ac                 |
| 171 | AV, Guanosine analogue               | TP | NT | TP | -                                                                           | pit ht  | tes hp                        | mam ac; skin sar                                  |
| 189 | AV, protease inhibitor               | TP | NT | TP | -                                                                           | thyr ht | li hp; kid<br>hp              | adr bpha                                          |
| 206 | AI, COX2-inhibitor                   | FN | TN | TN | li                                                                          | -       | -                             | li ac                                             |

|     |                                        |    |    |    |                          |                   |   |                               |
|-----|----------------------------------------|----|----|----|--------------------------|-------------------|---|-------------------------------|
| 222 | AI, COX2-inhibitor                     | FN | TN | TN | -                        | li ht;<br>thyr ht | - | thyr ad; li ad                |
| 260 | AI, NSAID                              | FN | TN | TN | -                        | -                 | - | tes ad;                       |
| 277 | CNS, 5-HT1b/d agonist                  | FN | TN | TN | -                        | -                 | - | adr bpha; tes ad              |
| 239 | CNS, antiepileptic, Na-channel blocker | FN | TN | TN | adr ; pit ;<br>kid ; li  | -                 | - | adr bpha                      |
| 204 | CNS, Benzodiazepine                    | FN | TN | TN | -                        | -                 | - | thyr ad; thy lymph; ut schwan |
| 248 | CNS, benzodiazepine                    | FN | TN | TN | -                        | li ht             | - | thyr ad                       |
| 205 | CNS, Opioid, mu-agonist                | FN | TN | TN | -                        | -                 | - | tes tu; hsyst leu             |
| 250 | CNS, SNRI                              | FN | TN | TN | -                        | li ht             | - | thyr ad                       |
| 276 | CNS, SNRI                              | FN | TN | TN | kid                      | -                 | - | tes ad                        |
| 262 | CNS, SSRI                              | FN | TN | TN | li                       | -                 | - | In lymph                      |
| 208 | CVS, ACE inhibitor                     | FN | TN | TN | kid ; li                 | kid ht            | - | tes tu                        |
| 266 | CVS, ACE inhibitor                     | FN | TN | TN | -                        | -                 | - | thyr ac                       |
| 271 | CVS, ACE inhibitor                     | FN | TN | TN | -                        | -                 | - | kid ad                        |
| 285 | CVS, ACE inhibitor                     | FN | TN | TN | -                        | -                 | - | mam fad                       |
| 233 | CVS, ACE-inhibitor                     | FN | TN | TN | kid                      | -                 | - | thyr ad; ut polyp             |
| 249 | CVS, Alpha1 agonist                    | FN | TN | TN | -                        | -                 | - | tes ad                        |
| 289 | CVS, anticoagulant                     | FN | TN | TN | -                        | -                 | - | pan ad/ca                     |
| 203 | CVS, Beta antagonist                   | FN | TN | TN | tes ; adr ;<br>li        | -                 | - | pit tu                        |
| 219 | CVS, Beta antagonist                   | FN | TN | TN | kid                      | -                 | - | skin SCP                      |
| 243 | CVS, Beta antagonist                   | FN | TN | TN | thyr ; li ;<br>adr ; kid | -                 | - | li ad                         |
| 255 | CVS, Beta antagonist,                  | FN | TN | TN | -                        | -                 | - | spl bhaem                     |
| 200 | CVS, Calcium antagonist                | FN | TN | TN | -                        | -                 | - | ut polyp                      |
| 235 | CVS, Calcium antagonist                | FN | TN | TN | -                        | -                 | - | tes ad                        |
| 237 | CVS, Calcium antagonist                | FN | TN | TN | ova                      | -                 | - | tes ad                        |
| 240 | CVS, Calcium antagonist                | FN | TN | TN | -                        | adr ht            | - | mam fad; pit ad               |

|     |                                          |    |    |    |          |        |          |                                                   |
|-----|------------------------------------------|----|----|----|----------|--------|----------|---------------------------------------------------|
| 256 | CVS, Calcium antagonist                  | FN | TN | TN | -        | -      | -        | thyr ad; thyr ac                                  |
| 247 | CVS, Calcium antagonist.                 | FN | TN | TN | li ; hrt | -      | -        | ut polyp; oral SCC                                |
| 252 | CVS, Imidazoline agonist                 | FN | TN | TN | -        | -      | -        | adr tu                                            |
| 272 | CVS, Na-channel block                    | FN | TN | TN | -        | li ht  | -        | thyr ad; tes ad; adr bpha; adr bpha               |
| 209 | CVS, PDE3 inhibitor                      | FN | TN | TN | li ; kid | -      | -        | adr bpha                                          |
| 212 | GI, 5HT4 agonist                         | FN | TN | TN | -        | -      | -        | tes tu; pit ad                                    |
| 269 | GI, 5HT4-agonist                         | FN | TN | TN | -        | -      | -        | thyr ad; mam fad; pan ad; adr bpha; li ad; pit ad |
| 210 | GI, Histamine H2 antagonist              | FN | TN | TN | li       | -      | -        | tes ad                                            |
| 275 | GI, Histamine H2 antagonist              | FN | TN | TN | -        | -      | -        | skin fibr                                         |
| 194 | MB, antidiabetic, alfa-glucosidase inhib | FN | TN | TN | -        | -      | -        | tes ad; kid ad; kid ac;                           |
| 195 | RS, Histamine H1 antagonist              | FN | TN | TN | li ; kid | -      | -        | adr bpha                                          |
| 207 | RS, Histamine H1 antagonist              | FN | TN | TN | -        | li ht  | -        | thyr ad; pit ac; li ac                            |
| 264 | RS, remaining, Methylxanthine-derivate   | FN | TN | TN | li       | -      | -        | tes tu; mam fad                                   |
| 268 | UB, Anticholinergic                      | FN | TN | TN | -        | li ht  | -        | ut polyp; kid pap                                 |
| 283 | UB, Anticholinergic                      | FN | TN | TN | -        | -      | -        | kid sar                                           |
| 287 | UB, Anticholinergic                      | FN | TN | TN | -        | -      | -        | skin sar                                          |
| 157 | CNS, SSRI                                | FP | TN | TN | -        | li ht  | li hp    | -                                                 |
| 159 | CVS, Alpha1 agonist                      | FP | TN | TN | -        | -      | mam hp   | -                                                 |
| 161 | CVS, Alpha1 antagonist and 5-HT1A        | FP | TN | TP | -        | -      | bm hp    | -                                                 |
| 145 | CVS, Alpha2 agonist                      | FP | TN | TN | -        | -      | thy hp   | -                                                 |
| 149 | CVS, Alpha2 agonist                      | FP | TN | TN | -        | -      | islet hp | -                                                 |
| 156 | CVS, Angiotensin II antagonist           | FP | TN | TN | -        | -      | kid hp   | -                                                 |
| 162 | CVS, Angiotensin II antagonist           | FP | TN | TN | -        | kid ht | kid hp   | -                                                 |
| 147 | CVS, Beta antagonist                     | FP | TN | TN | -        | adr ht | thyr hp  | -                                                 |
| 148 | CVS, Beta antagonist /alpha-1 blocker    | FP | TN | TN | li       | -      | li hp    | -                                                 |
| 154 | RS, Histamine H1 antagonist              | FP | TN | TN | -        | -      | mam hp   | -                                                 |
| 155 | RS, Histamine H1 antagonist              | FP | TN | TN | li       | li ht  | pan hp   | -                                                 |
| 108 | AI, COX2 inhibitor                       | TN | TN | TN | -        | -      | -        | -                                                 |

|     |                                        |    |    |    |                                        |                   |   |   |
|-----|----------------------------------------|----|----|----|----------------------------------------|-------------------|---|---|
| 72  | AI, COX2-inhibitor                     | TN | TN | TN | -                                      | -                 | - | - |
| 44  | AI, NSAID                              | TN | TN | TN | kid                                    | -                 | - | - |
| 45  | AI, NSAID                              | TN | TN | TN | -                                      | -                 | - | - |
| 50  | AI, NSAID                              | TN | TN | TN | kid ; spl                              | -                 | - | - |
| 64  | AI, NSAID                              | TN | TN | TN | -                                      | -                 | - | - |
| 74  | AI, NSAID                              | TN | TN | TN | -                                      | -                 | - | - |
| 83  | AI, NSAID                              | TN | TN | TN | li ; kid                               | -                 | - | - |
| 91  | AI, NSAID                              | TN | TN | TN | hrt ; adr ;<br>kid                     | -                 | - | - |
| 124 | AI, NSAID                              | TN | TN | TN | -                                      | -                 | - | - |
| 129 | AI, NSAID                              | TN | TN | TN | -                                      | -                 | - | - |
| 71  | AI, NSAID,                             | TN | TN | TN | -                                      | -                 | - | - |
| 3   | BM, bisphosphonate                     | TN | TN | TN | -                                      | -                 | - | - |
| 33  | BM, bisphosphonate                     | TN | TN | TN | -                                      | -                 | - | - |
| 87  | BM, Bisphosphonate,                    | TN | TN | TN | thyr ;<br>parath                       | bo ht             | - | - |
| 4   | CNS, 5-HT1b/d agonist                  | TN | TN | TN | -                                      | thyr ht;<br>li ht | - | - |
| 107 | CNS, 5-HT1b/d agonist,                 | TN | TN | TN | -                                      | -                 | - | - |
| 95  | CNS, 5-HT3 antagonist                  | TN | TN | TN | -                                      | -                 | - | - |
| 24  | CNS, antiepileptic, Na-channel blocker | TN | TN | TN | -                                      | li ht             | - | - |
| 49  | CNS, antiepileptic, Na-channel blocker | TN | TN | TN | -                                      | -                 | - | - |
| 65  | CNS, antiepileptic, Na-channel blocker | TN | TN | TN | -                                      | li ht             | - | - |
| 66  | CNS, antiepileptic, Na-channel blocker | TN | TN | TN | -                                      | li ht             | - | - |
| 5   | CNS, Benzodiazepine                    | TN | TN | TN | -                                      | -                 | - | - |
| 142 | CNS, benzodiazepine-like hypnotic      | TN | TN | TN | -                                      | -                 | - | - |
| 143 | CNS, benzodiazepine-like hypnotic      | TN | TN | TN | spl ; li ;<br>kid ; tes ;<br>hrt ; pit | li ht             | - | - |
| 84  | CNS, Opioid, mu-agonist                | TN | TN | TN | -                                      | -                 | - | - |

|     |                                          |    |    |    |                                                               |        |   |   |
|-----|------------------------------------------|----|----|----|---------------------------------------------------------------|--------|---|---|
| 132 | CNS, Opioid, mu-agonist, anticholinergic | TN | TN | TN | -                                                             | -      | - | - |
| 85  | CNS, Opioid, mu-antagonist               | TN | TN | TN | -                                                             | -      | - | - |
| 86  | CNS, Opioid, mu-antagonist               | TN | TN | TN | -                                                             | -      | - | - |
| 103 | CNS, SNRI                                | TN | TN | TN | -                                                             | -      | - | - |
| 137 | CNS, SNRI                                | TN | TN | TN | -                                                             | -      | - | - |
| 29  | CNS, SSRI                                | TN | TN | TN | -                                                             | -      | - | - |
| 54  | CNS, SSRI                                | TN | TN | TN | -                                                             | -      | - | - |
| 112 | CNS, SSRI                                | TN | TN | TN | kid                                                           | li ht  | - | - |
| 88  | CNS, SSRI, 5-HT antagonist               | TN | TN | TN | -                                                             | -      | - | - |
| 15  | CVS, ACE inhibitor                       | TN | TN | TN | -                                                             | -      | - | - |
| 69  | CVS, ACE inhibitor                       | TN | TN | TN | -                                                             | -      | - | - |
| 117 | CVS, ACE inhibitor                       | TN | TN | TN | kid                                                           | kid ht | - | - |
| 13  | CVS, Angiotensin II antagonist           | TN | TN | TN | -                                                             | -      | - | - |
| 23  | CVS, Angiotensin II antagonist           | TN | TN | TN | -                                                             | kid ht | - | - |
| 40  | CVS, Angiotensin II antagonist           | TN | TN | TN | -                                                             | -      | - | - |
| 10  | CVS, anticoagulant                       | TN | TN | TN | -                                                             | -      | - | - |
| 14  | CVS, Beta antagonist                     | TN | TN | TN | -                                                             | -      | - | - |
| 16  | CVS, Beta antagonist                     | TN | TN | TN | -                                                             | -      | - | - |
| 17  | CVS, Beta antagonist                     | TN | TN | TN | hrt ; li                                                      | -      | - | - |
| 25  | CVS, Beta antagonist                     | TN | TN | TN | pit ; lu ;<br>hrt ; spl ;<br>kid ; adr ;<br>tes ; ova ;<br>br | -      | - | - |
| 26  | CVS, Beta antagonist                     | TN | TN | TN | -                                                             | -      | - | - |
| 126 | CVS, Beta antagonist                     | TN | TN | TN | -                                                             | -      | - | - |
| 127 | CVS, Beta antagonist                     | TN | TN | TN | -                                                             | -      | - | - |
| 9   | CVS, Calcium antagonist                  | TN | TN | TN | hrt ; kid                                                     | adr ht | - | - |

|     |                                          |    |    |    |                                             |                                        |                   |   |
|-----|------------------------------------------|----|----|----|---------------------------------------------|----------------------------------------|-------------------|---|
| 90  | CVS, Calcium antagonist                  | TN | TN | TN | spl ; kid ;<br>ova ; hrt ;<br>li ; adr ; br | -                                      | -                 | - |
| 92  | CVS, Calcium antagonist                  | TN | TN | TN | -                                           | -                                      | -                 | - |
| 93  | CVS, Calcium antagonist                  | TN | TN | TN | -                                           | -                                      | -                 | - |
| 38  | CVS, class 1C antiarrhythmic             | TN | TN | TN | thyr ; li                                   | -                                      | -                 | - |
| 53  | CVS, class 1C antiarrhythmic             | TN | TN | TN | hrt ; li                                    | -                                      | -                 | - |
| 6   | CVS, endothelin antagonist               | TN | TN | TN | -                                           | li ht; int<br>ht; adr<br>ht; mam<br>ht | nose hp;<br>bm hp | - |
| 115 | CVS, endothelin antagonist               | TN | TN | TN | -                                           | -                                      | -                 | - |
| 105 | CVS, Imidazoline agonist                 | TN | TN | TN | adr ; tes                                   | -                                      | -                 | - |
| 100 | CVS, Na-channel block                    | TN | TN | TN | -                                           | -                                      | -                 | - |
| 101 | CVS, Na-channel block                    | TN | TN | TN | -                                           | li ht                                  | -                 | - |
| 77  | CVS, PDE3 inhibitor                      | TN | TN | TN | adr                                         | -                                      | -                 | - |
| 110 | CVS, vasopressin-2 agonist               | TN | TN | TN | -                                           | -                                      | -                 | - |
| 131 | CVS, vasopressin-2 agonist               | TN | TN | TN | -                                           | -                                      | -                 | - |
| 121 | GI, 5HT4-agonist                         | TN | TN | TN | -                                           | -                                      | -                 | - |
| 48  | GI, Histamine H2 antagonist              | TN | TN | TN | br ; hrt ;<br>kid ; tes ;<br>li ; ova       | -                                      | -                 | - |
| 94  | GI, Histamine H2 antagonist              | TN | TN | TN | li ; kid                                    | -                                      | -                 | - |
| 76  | MB, antidiabetic, alfa-glucosidase inhib | TN | TN | TN | -                                           | -                                      | -                 | - |
| 68  | MB, antidiabetic, DPP4 inhibitor         | TN | TN | TN | -                                           | thyr ht;<br>li ht                      |                   | - |
| 111 | MB, antidiabetic, DPP4 inhibitor         | TN | TN | TN | -                                           | -                                      |                   | - |
| 114 | MB, antidiabetic, DPP4 inhibitor         | TN | TN | TN | -                                           | -                                      | -                 | - |
| 139 | MB, antidiabetic, DPP4 inhibitor         | TN | TN | TN | -                                           | -                                      | -                 |   |
| 61  | RS, Anticholinergic                      | TN | TN | TN | -                                           | -                                      | -                 | - |

|     |                                          |    |     |    |                              |        |                                      |                                                      |
|-----|------------------------------------------|----|-----|----|------------------------------|--------|--------------------------------------|------------------------------------------------------|
| 128 | RS, Anticholinergic                      | TN | TN  | TN | -                            | -      | -                                    | -                                                    |
| 11  | RS, Histamine H1 antagonist              | TN | TN  | TN | -                            | -      | -                                    | -                                                    |
| 12  | RS, Histamine H1 antagonist              | TN | TN  | TN | li ; lu ; hrt<br>; kid ; tes | li ht  | -                                    | -                                                    |
| 67  | RS, HistamineH1 antagonist               | TN | TN  | TN | -                            | li ht  | -                                    | -                                                    |
| 82  | RS, remaining, Leukotriene receptor a    | TN | TN  | TN | -                            | -      | -                                    | -                                                    |
| 116 | RS, remaining, Mast cell stabilisor      | TN | TN  | TN | -                            | -      | -                                    | -                                                    |
| 51  | UB, Anticholinergic                      | TN | TN  | TN | -                            | -      | pit ad; br<br>ac; mes<br>lip; pit ac | -                                                    |
| 125 | UB, Anticholinergic and calcium antagoni | TN | TN  | TN | thyr ; adr<br>; ova ; li     | -      | -                                    | -                                                    |
| 35  | CNS, SSRI                                | TN | TN  | TN | -                            | -      | -                                    | -                                                    |
| 37  | CVS, ACE inhibitor                       | TN | TN  | TN | -                            | -      | -                                    | -                                                    |
| 31  | UB, Anticholinergic                      | TN | TN  | TN | -                            | -      | -                                    | -                                                    |
| 164 | AI, NSAID                                | TP | TN  | TN | -                            | -      | kid hp;<br>UGT hp                    | adr bpha                                             |
| 181 | CNS, 5-HT1b/d agonist,                   | TP | TN  | TN | kid                          | -      | epi hp;<br>tes hp                    | thyr ad; pit ad; thy bthym                           |
| 176 | CNS, 5-HT3 antagonist                    | TP | TN  | TN | -                            | -      | -                                    | li ad; li ac                                         |
| 183 | CNS, antiepileptic, Na-channel blocker   | TP | TN  | TN | kid ; adr                    | li ht  | kid hp                               | li ac                                                |
| 174 | CVS, ACE inhibitor                       | TP | TN  | TN | thyr                         | -      | kid hp                               | pit ad; br ac; mes lip; pit ac                       |
| 186 | CVS, ACE inhibitor                       | TP | TN  | TN | -                            | kid ht | kid hp                               | ln bhaem                                             |
| 167 | CVS, Alpha2 agonist, indicatie ocular    | TP | TN  | TN | -                            | int ht | int hp                               | pan ac; thyr ad; mam ad                              |
| 165 | CVS, Calcium antagonist                  | TP | TN  | TN | li                           | li ht  | ln hp;<br>thyr hp                    | thyr ad                                              |
| 172 | CVS, Calcium antagonist                  | TP | TN  | TN | -                            | -      | col hp                               | mam fad; adr bpha; tes ad; pit ad;<br>mam ac; pit ca |
| 234 | BM, remaining, Isoflavone                | FN | TN* | TN | -                            | -      | -                                    | pit ad; li ad                                        |
| 197 | CNS, remaining, melatonin receptor       | FN | TN* | TN | -                            | -      | -                                    | li ad; li ac                                         |



|     |                                                   |    |     |    |                                          |        |         |                   |
|-----|---------------------------------------------------|----|-----|----|------------------------------------------|--------|---------|-------------------|
|     | agonist                                           |    |     |    |                                          |        |         |                   |
| 223 | CNS, remaining, NMDA-antagonist                   | FN | TN* | TN | -                                        | -      | -       | tes ad            |
| 261 | CNS, remaining, nootropic drug                    | FN | TN* | TN | -                                        | -      | -       | adr bpha          |
| 232 | CVS, remaining, D1/alpha agonist                  | FN | TN* | TN | adr ; kid                                | -      | -       | pan ad            |
| 216 | CVS, remaining, imidazole, PDE-inh                | FN | TN* | TN | -                                        | -      | -       | adr bpha          |
| 225 | CVS, remaining, Quinolone vasodila                | FN | TN* | TN | li ; thyr ;<br>adr ; spl ;<br>pros ; tes | -      | -       | adr bpha          |
| 198 | CVS, remaining, renin inhibitor                   | FN | TN* | TN | -                                        | col ht | -       | col ad; col ac    |
| 238 | GI, remaining, Sugar alcohol                      | FN | TN* | TN | -                                        | li ht  | -       | tes tu            |
| 196 | ZZ, Remaining, retinoid, topical,<br>keratinocyte | FN | TN* | TN | pit ; adr                                | -      | -       | adr bpha; thyr ad |
| 151 | MB, Antidiabetic, remaining, SGLT-2<br>inhibitor  | FP | TN* | TN | -                                        | kid ht | kid hp  | -                 |
| 160 | MB, remaining, 3 beta-hydroxysteroid de           | FP | TN* | TN | -                                        | adr ht | adr hp  | -                 |
| 153 | UB, remaining xanthine oxidase inhibito           | FP | TN* | TN | -                                        | -      | thyr hp | -                 |
| 7   | AI, remaining,                                    | TN | TN* | TN | li;                                      | -      | -       | -                 |
| 122 | AI, remaining, cytokine-modulat                   | TN | TN* | TN | -                                        | -      | -       | -                 |
| 28  | BM, remaining, calcium-mimetic                    | TN | TN* | TN | -                                        | -      | -       | -                 |
| 75  | CNS, Opioid, remaining, kappa agonist             | TN | TN* | TN | -                                        | -      | -       | -                 |
| 22  | CNS, remaining 5HT, 5-HT1-agonist                 | TN | TN* | TN | -                                        | -      | -       | -                 |
| 56  | CNS, remaining, acetylcholinesterase inhib        | TN | TN* | TN | -                                        | sgl ht | -       | -                 |
| 96  | CNS, remaining, AMPA Glutamate<br>antagonist      | TN | TN* | TN | -                                        | -      | -       | -                 |
| 106 | CNS, remaining, cannabinoid antagonist            | TN | TN* | TN | -                                        | -      | -       | -                 |
| 20  | CNS, remaining, DA-NA uptake inhibitor            | TN | TN* | TN | li ; adr ;<br>thyr                       | li ht  | -       | -                 |
| 118 | CNS, remaining, GABA-enhancer                     | TN | TN* | TN | -                                        | -      | -       | -                 |
| 138 | CNS, remaining, GABA-metab. inhib                 | TN | TN* | TN | -                                        | -      | -       | -                 |

|     |                                                |    |     |    |                                                      |                   |   |   |
|-----|------------------------------------------------|----|-----|----|------------------------------------------------------|-------------------|---|---|
| 81  | CNS, remaining, MAO-A inhibitor                | TN | TN* | TN | lu ; kid ;<br>thyr ; tes ;<br>ova                    | -                 | - | - |
| 102 | CNS, remaining, MAO-B inhibitor                | TN | TN* | TN | -                                                    | li ht             | - | - |
| 136 | CNS, Remaining, Nicotine agonist               | TN | TN* | TN | -                                                    | -                 | - | - |
| 63  | CVS, remaining, 5-HT2 antagonist               | TN | TN* | TN | spl ; li ;<br>kid ; hrt ;<br>pan ; br ;<br>thy ; adr | -                 | - | - |
| 141 | CVS, remaining, B1 partial agonist             | TN | TN* | TN | -                                                    | -                 | - | - |
| 36  | CVS, remaining, hemostatic                     | TN | TN* | TN | -                                                    | -                 | - | - |
| 89  | CVS, remaining, Nitr/K+ATP agonist             | TN | TN* | TN | -                                                    | -                 | - | - |
| 113 | CVS, remaining, PDE5-inhibitor                 | TN | TN* | TN | -                                                    | li ht;<br>thyr ht | - | - |
| 78  | CVS, remaining, vasodilator                    | TN | TN* | TN | -                                                    | hrt ht            | - | - |
| 119 | GI, remaining, anti-osteoporose agent          | TN | TN* | TN | -                                                    | -                 | - | - |
| 32  | GI, remaining, Fe-chelator                     | TN | TN* | TN | -                                                    | -                 | - | - |
| 70  | GI, remaining, Opioid, mu-agonist              | TN | TN* | TN | -                                                    | -                 | - | - |
| 30  | GI, remaining, Phosphate binder                | TN | TN* | TN | -                                                    | -                 | - | - |
| 80  | GI, remaining, Synthetisch prostaglandin       | TN | TN* | TN | adr ; li                                             | -                 | - | - |
| 58  | MB, Antidiabetic, remaining, SU derivative     | TN | TN* | TN | -                                                    | -                 | - | - |
| 130 | MB, remaining, Aldose reductase inhibit        | TN | TN* | TN | -                                                    | -                 | - | - |
| 43  | MB, remaining, hypertriglyceridemia            | TN | TN* | TN | -                                                    | -                 | - | - |
| 57  | MB, remaining, lipid replacement               | TN | TN* | TN | -                                                    | -                 | - | - |
| 1   | MB, remaining, nicotinic acid derived,         | TN | TN* | TN | -                                                    | -                 | - | - |
| 79  | UB, remaining,oral Beta 3 agonist              | TN | TN* | TN | -                                                    | li ht             | - | - |
| 62  | ZZ, remaining, CFTR potentiator                | TN | TN* | TN | -                                                    | -                 | - | - |
| 39  | ZZ, Remaining, Prostaglandin E2                | TN | TN* | TN | -                                                    | -                 | - | - |
| 109 | ZZ, remaining, protein kinase C-beta inhibitor | TN | TN* | TN | -                                                    | -                 | - | - |

|     |                                         |    |    |    |                            |         |        |                                                      |
|-----|-----------------------------------------|----|----|----|----------------------------|---------|--------|------------------------------------------------------|
| 274 | CNS, DA2 agonist                        | FN | TP | TP | adr                        | li ht   | -      | tes ad; skin fibr                                    |
| 245 | CNS, DA2 agonist                        | FN | TP | TP | -                          | -       | -      | tes ad; tes ca                                       |
| 265 | CNS, DA2 agonist                        | FN | TP | TP | -                          | -       | -      | pit ad; ut ac                                        |
| 270 | CNS, DA2 agonist                        | FN | TP | TP | -                          | -       | -      | tes ad                                               |
| 273 | CNS, DA2-antagonist                     | FN | TP | TP | -                          | -       | -      | islet ad; mam ac; pit ad                             |
| 278 | CVS, Alpha1 antagonist                  | FN | TP | TP | br ;li ; kid ; hrt         | -       | -      | adr bpha; mam ac                                     |
| 259 | GI, Proton pump inhibitor               | FN | TP | TP | -                          | stom ht | -      | stom tu; stom SCC; li ad                             |
| 215 | HM, Dual 5 reductase inhibitor.         | FN | TP | TP | -                          | -       | -      | tes ad                                               |
| 224 | HM, Dual 5-reductase inhibitor          | FN | TP | TP | -                          | -       | -      | thyr ad                                              |
| 221 | HM, estrogen agonist                    | FN | TP | TP | -                          | -       | -      | pit ad                                               |
| 281 | HM, estrogen agonist,                   | FN | TP | TP | -                          | -       | -      | li ad; mam ca                                        |
| 254 | HM, GnRH agonist                        | FN | TP | TP | -                          | -       | -      | adr bpha; adr mpha; islet ad; tes ad; pit ad; pit ca |
| 286 | HM, GnRH agonist                        | FN | TP | TP | -                          | -       | -      | pit ad; pit ca                                       |
| 257 | HM, progestagen-estrogen contraceptive. | FN | TP | TP | adr ; li                   | -       | -      | pit ad; mam ad; mam ac                               |
| 214 | HM, progesterone antagonist, birth cont | FN | TP | TP | li                         | -       | -      | li ad; ut ac; mam ac                                 |
| 241 | HM, remaining, aromatase inhibitor      | FN | TP | TP | -                          | li ht   | -      | ova gca; UGT pap                                     |
| 201 | HM, selective estrogen modulator        | FN | TP | TP | -                          | -       | -      | kid ad; kid ac; ova ad                               |
| 202 | MB, fibrate                             | FN | TP | TP | -                          | -       | -      | tes tu; adr bpha; li ac                              |
| 211 | MB, fibrate                             | FN | TP | TP | li ; kid ; hrt ; adr ; tes | -       | -      | pan ad; stom tu; li ad; li ac                        |
| 267 | MB, HMG-CoA-reductase inhibitor         | FN | TP | TP | -                          | -       | -      | thyr ad; li ac                                       |
| 228 | RS, Beta2 agonist                       | FN | TP | TP | -                          | pan ht  | -      | thyr ad; thyr ac; ova leio; mam ac                   |
| 280 | RS, Beta2 agonist                       | FN | TP | TP | -                          | -       | -      | ova leio                                             |
| 288 | RS, Beta2 agonist                       | FN | TP | TP | lu ; hrt                   | hrt ht  | -      | ova leio; pit ad; pit ac                             |
| 199 | RS, Beta2-agonist                       | FN | TP | TP | li                         | -       | -      | thyr ad                                              |
| 227 | RS, Corticosteroid                      | FN | TP | TP | -                          | -       | -      | islet tu; adr bpha; skin sar                         |
| 144 | CVS, Alpha1 antagonist                  | FP | TP | TP | -                          | -       | mam hp | -                                                    |

|     |                                        |    |    |    |                                      |                               |                  |                                                            |
|-----|----------------------------------------|----|----|----|--------------------------------------|-------------------------------|------------------|------------------------------------------------------------|
| 150 | IS, Immunosuppressive                  | FP | TP | TP | -                                    | -                             | In hp            | -                                                          |
| 152 | IS, Immunosuppressive, mTOR inhibitor  | FP | TP | TP | -                                    | stom ht;<br>thyr ht           | stom hp          | -                                                          |
| 146 | MB, HMG-CoA reductase inhibitor        | FP | TP | TP | -                                    | -                             | li hp            | -                                                          |
| 59  | CNS, DA2-antagonist/5HT antagonist     | TN | TP | TP | -                                    | -                             | -                | -                                                          |
| 19  | CVS, Alpha1 antagonist                 | TN | TP | TP | kid ; br ;<br>tes                    | -                             | -                | -                                                          |
| 34  | CVS, Alpha1 antagonist                 | TN | TP | TP | -                                    | -                             | -                | -                                                          |
| 133 | CVS, Alpha1 antagonist                 | TN | TP | TP | -                                    | -                             | -                | -                                                          |
| 41  | GI, Proton pump inhibitor              | TN | TP | TP | -                                    | -                             | -                | -                                                          |
| 21  | HM, GnRH agonist                       | TN | TP | TP | -                                    | -                             | -                | -                                                          |
| 42  | HM, progestagen-estrogen contraceptive | TN | TP | TP | pit ; thyr                           | -                             | -                | -                                                          |
| 120 | IS, Immunosuppressive                  | TN | TP | TP | -                                    | -                             | -                | -                                                          |
| 140 | IS, Immunosuppressive                  | TN | TP | TP | -                                    | -                             | -                | -                                                          |
| 47  | IS, Immunosuppressive, mTOR inhibitor  | TN | TP | TP | -                                    | thyr ht                       | -                | -                                                          |
| 52  | IS, Immunosuppressive, S1P antagonist  | TN | TP | TP | -                                    | -                             | -                | -                                                          |
| 46  | MB, fibrate                            | TN | TP | TP | -                                    | -                             | -                | -                                                          |
| 27  | MB, HMG-CoA reductase inhibitor        | TN | TP | TP | -                                    | -                             | -                | -                                                          |
| 163 | CNS, DA2-antagonist, Benzamide,        | TP | TP | TP | -                                    | -                             | mam hp           | pan ad; pan ac; adr bpha; mam ca; pit ca                   |
| 188 | CNS, DA2-antagonist, DA3 antagonist    | TP | TP | TP | li                                   | -                             | lu hp            | mam ca                                                     |
| 192 | CVS, Alpha1 antagonist                 | TP | TP | TP | -                                    | li ht; vag<br>ht              | li hp;<br>mam hp | thyr ad; thyr ac                                           |
| 193 | CVS, Alpha1 antagonist                 | TP | TP | TP | -                                    | -                             | mam hp           | mam ad; hsyst leu                                          |
| 178 | GI, Proton pump inhibitor              | TP | TP | TP | li ; li ; lu ;<br>stom               | li ht;<br>stom ht;<br>stom ht | stom hp          | tes ad; tes ad                                             |
| 187 | GI, Proton pump inhibitor              | TP | TP | TP | li ; kid ;<br>stom ;<br>thyr ; hrt ; | li ht;<br>stom ht;<br>thyr ht | stom hp          | adr bpha; tes ad; stom SCP; stom SCC;<br>hsyst leu; pit ad |

|     |                                              |    |     |    |                                                |                                         |                   |                                                                 |
|-----|----------------------------------------------|----|-----|----|------------------------------------------------|-----------------------------------------|-------------------|-----------------------------------------------------------------|
|     |                                              |    |     |    | spl                                            |                                         |                   |                                                                 |
| 175 | HM, GnRH agonist                             | TP | TP  | TP | -                                              | -                                       | tes hp            | pit ad                                                          |
| 180 | HM, GnRH agonist                             | TP | TP  | TP | br                                             | pit ht                                  | pit hp            | pit ad                                                          |
| 166 | HM, remaining, antiandrogen,                 | TP | TP  | TP | tes ; adr                                      | li ht; ova<br>ht; adr<br>ht; thyr<br>ht | tes hp;<br>ova hp | te ad; thyr ad; ut ac                                           |
| 179 | HM, selective estrogen modulator             | TP | TP  | TP | -                                              | -                                       | ova hp            | kid ac; ova ad                                                  |
| 190 | MB, HMG-CoA reductase inhibitor              | TP | TP  | TP | -                                              | li ht                                   | li hp;<br>stom hp | ut polyp                                                        |
| 173 | MB, HMG-CoA-reductase inhibitor              | TP | TP  | TP | thyr                                           | -                                       | stom hp           | stom SCP; thyr ac; thyr ad                                      |
| 191 | RS, Beta2 agonist                            | TP | TP  | TP | -                                              | -                                       | nose hp           | ova leio; pit ad                                                |
| 168 | RS, Corticosteroid                           | TP | TP  | TP | -                                              | -                                       | mam hp            | mam fad; li ac; br astr; li ad                                  |
| 170 | RS, Corticosteroid                           | TP | TP  | TP | many; tes<br>; br ; hrt ;<br>kid ; pit ;<br>li | li ht                                   | pan hp; ln<br>hp  | pan ad; pan ac; bo most; li ad; li ac; li<br>ac; mam ad; mam ac |
| 213 | CNS, remaining, Carbonic anhydrase inhibitor | FN | TP* | TP | -                                              | -                                       | -                 | UGT pap                                                         |
| 258 | MB, remaining, Inhib.growth hormone          | FN | TP* | TP | -                                              | -                                       | -                 | sk sar; ut ac                                                   |
| 134 | MB, antidiabetic, remaining, PPAR-gamma      | TN | TP* | TP | hrt ; li                                       | li ht                                   | -                 | -                                                               |
| 177 | CNS, remaining, Electron transporter         | TP | TP* | TP | -                                              | -                                       | stom hp           | Squamous cell and basal carcinomas                              |
| 169 | CVS, remaining, Hydrazinophthalzine          | TP | TP* | TP | -                                              | pit ht                                  | thyr hp;          | thyr ad; thyr ac                                                |
