# Supplementary material for: Prediction of the Carcinogenic Potential of Human Pharmaceuticals Using Repeated Dose Toxicity Data and Their Pharmacological Properties
Source: PubMed Central journal article supplement (PMC5063850; doi:10.3389/fmed.2016.00045), 2016-10-14
Supplement: table_5.pdf [file table_5.pdf]

**Table S5 (Supplementary Material) Summary of the observations in the sub-chronic and carcinogenicity studies, sorted by Final Categories**

| #   | Mode of Action                            | Cat. His | Cat Ph. | Fin. cat. | Weight                                                       | Sub-chronic    |                         | Carcinogenicity                                 |
|-----|-------------------------------------------|----------|---------|-----------|--------------------------------------------------------------|----------------|-------------------------|-------------------------------------------------|
|     |                                           |          |         |           |                                                              | HT             | HP                      |                                                 |
| 220 | CNS, 5HT2 antagonist                      | FN       | NC      | FN        | -                                                            | -              | -                       | li ad                                           |
| 230 | CNS, remaining, alpha2-delta agonist      | FN       | NC      | FN        | -                                                            | -              | -                       | pan ac; pan ad; tes ad; ut polyp                |
| 251 | CNS, remaining, antidepressant            | FN       | NC      | FN        | -                                                            | li ht; thyr ht | -                       | thyr ac; mam ca; li ad; li ac                   |
| 217 | CNS, remaining, COMT-inhibitor            | FN       | NC      | FN        | adr                                                          | -              | -                       | kid ad; kid ac                                  |
| 229 | CVS, Loop diuretic                        | FN       | NC      | FN        | -                                                            | -              | -                       | thyr ad; pit ad                                 |
| 253 | CVS, Loop diuretic                        | FN       | NC      | FN        | -                                                            | -              | -                       | tes ad; ut ac                                   |
| 284 | CVS, Loop diuretic                        | FN       | NC      | FN        | -                                                            | -              | -                       | kid ac; kid ad                                  |
| 282 | CVS, platelet aggregation inhibitor       | FN       | NC      | FN        | -                                                            | li ht          | -                       | thyr ad; adr bpha; ut ac; li ad; ova ad; mam ad |
| 242 | IS, remaining, imidazothiazole derivative | FN       | NC      | FN        | -                                                            | -              | -                       | pit ad                                          |
| 231 | AB, Fluoroquinolone                       | FN       | NT      | FN        | col ; kid                                                    | -              | -                       | hsyst leu                                       |
| 244 | AB, Fluoroquinolone                       | FN       | NT      | FN        | -                                                            | -              | -                       | pan tu                                          |
| 263 | AB, Fluoroquinolone                       | FN       | NT      | FN        | ce ; hrt ; li ; spl ; adr ; ova                              | -              | -                       | kid ac                                          |
| 226 | AF, conazole derivative                   | FN       | NT      | FN        | li                                                           | li ht          | -                       | li ad                                           |
| 236 | AF, conazole derivative                   | FN       | NT      | FN        | adr ; li ; hrt ; kid ; thy ; lu ; spl ; pan ; br ; gon ; ova | adr ht         | -                       | soft t sar                                      |
| 279 | AF, remaining, allylamine derivative      | FN       | NT      | FN        | hrt ; adr                                                    | -              | -                       | tes tu; li ad; li ac                            |
| 246 | AV, CCR5 receptor antagonist              | FN       | NT      | FN        | -                                                            | thyr ht        | -                       | thyr ad                                         |
| 218 | AV, hepatitis B-inhibitor                 | FN       | NT      | FN        | -                                                            | -              | -                       | pan ad; pan ac; li ad; li ac; Zymgl ca; br gli  |
| 158 | AB, remaining, bactericidal               | FP       | NT      | FP        | li ; spl ; kid ; thyr                                        | -              | stom hp; ut hp; stom hp | -                                               |

|     |                                        |    |    |    |                         |                |        |                               |
|-----|----------------------------------------|----|----|----|-------------------------|----------------|--------|-------------------------------|
| 98  | CVS, Loop diuretic                     | TN | NC | TN | -                       | -              | -      | -                             |
| 99  | CVS, platelet aggregation inhibito     | TN | NC | TN | -                       | li ht; thyr ht | -      | -                             |
| 8   | IS, remaining                          | TN | NC | TN | -                       | -              | -      | -                             |
| 184 | RS, remaining, antifibrotic            | TP | NC | TN | -                       | adr ht         | adr hp | li ad; ut ac                  |
| 2   | AF, remaining, benzimidazole           | TN | NT | TN | -                       | -              | -      | -                             |
| 73  | AM, remaining, antimalarial            | TN | NT | TN | -                       | -              | -      | -                             |
| 97  | AM, remaining, Antiparasite.           | TN | NT | TN | -                       | -              | -      | -                             |
| 123 | AV,                                    | TN | NT | TN | -                       | -              | -      | -                             |
| 135 | AV, herpes genitalis                   | TN | NT | TN | -                       | -              | -      | -                             |
| 60  | AV, immunostimulant                    | TN | NT | TN | li ; kid ; adr          | -              | -      | -                             |
| 104 | AV, Nucleoside inhibitor               | TN | NT | TN | -                       | -              | -      | -                             |
| 18  | AV, protease inhibitor                 | TN | NT | TN | -                       | -              | -      | -                             |
| 55  | AV, viral DNA polymerase inhibitor     | TN | NT | TN | -                       | -              | -      | -                             |
| 206 | AI, COX2-inhibitor                     | FN | TN | TN | li                      | -              | -      | li ac                         |
| 222 | AI, COX2-inhibitor                     | FN | TN | TN | -                       | li ht; thyr ht | -      | thyr ad; li ad                |
| 260 | AI, NSAID                              | FN | TN | TN | -                       | -              | -      | tes ad;                       |
| 277 | CNS, 5-HT1b/d agonist                  | FN | TN | TN | -                       | -              | -      | adr bpha; tes ad              |
| 239 | CNS, antiepileptic, Na-channel blocker | FN | TN | TN | adr ; pit ; kid ;<br>li | -              | -      | adr bpha                      |
| 204 | CNS, Benzodiazepine                    | FN | TN | TN | -                       | -              | -      | thyr ad; thy lymph; ut schwan |
| 248 | CNS, benzodiazepine                    | FN | TN | TN | -                       | li ht          | -      | thyr ad                       |
| 205 | CNS, Opioid, mu-agonist                | FN | TN | TN | -                       | -              | -      | tes tu; hsyst leu             |
| 250 | CNS, SNRI                              | FN | TN | TN | -                       | li ht          | -      | thyr ad                       |
| 276 | CNS, SNRI                              | FN | TN | TN | kid                     | -              | -      | tes ad                        |
| 262 | CNS, SSRI                              | FN | TN | TN | li                      | -              | -      | ln lymph                      |
| 208 | CVS, ACE inhibitor                     | FN | TN | TN | kid ; li                | kid ht         | -      | tes tu                        |
| 266 | CVS, ACE inhibitor                     | FN | TN | TN | -                       | -              | -      | thyr ac                       |

|     |                                          |    |    |    |                          |        |   |                                                      |
|-----|------------------------------------------|----|----|----|--------------------------|--------|---|------------------------------------------------------|
| 271 | CVS, ACE inhibitor                       | FN | TN | TN | -                        | -      | - | kid ad                                               |
| 285 | CVS, ACE inhibitor                       | FN | TN | TN | -                        | -      | - | mam fad                                              |
| 233 | CVS, ACE-inhibitor                       | FN | TN | TN | kid                      | -      | - | thyr ad; ut polyp                                    |
| 249 | CVS, Alpha1 agonist                      | FN | TN | TN | -                        | -      | - | tes ad                                               |
| 289 | CVS, anticoagulant                       | FN | TN | TN | -                        | -      | - | pan ad/ca                                            |
| 203 | CVS, Beta antagonist                     | FN | TN | TN | tes ; adr ; li           | -      | - | pit tu                                               |
| 219 | CVS, Beta antagonist                     | FN | TN | TN | kid                      | -      | - | skin SCP                                             |
| 243 | CVS, Beta antagonist                     | FN | TN | TN | thyr ; li ; adr ;<br>kid | -      | - | li ad                                                |
| 255 | CVS, Beta antagonist,                    | FN | TN | TN | -                        | -      | - | spl bhaem                                            |
| 200 | CVS, Calcium antagonist                  | FN | TN | TN | -                        | -      | - | ut polyp                                             |
| 235 | CVS, Calcium antagonist                  | FN | TN | TN | -                        | -      | - | tes ad                                               |
| 237 | CVS, Calcium antagonist                  | FN | TN | TN | ova                      | -      | - | tes ad                                               |
| 240 | CVS, Calcium antagonist                  | FN | TN | TN | -                        | adr ht | - | mam fad; pit ad                                      |
| 256 | CVS, Calcium antagonist                  | FN | TN | TN | -                        | -      | - | thyr ad; thyr ac                                     |
| 247 | CVS, Calcium antagonist.                 | FN | TN | TN | li ; hrt                 | -      | - | ut polyp; oral SCC                                   |
| 252 | CVS, Imidazoline agonist                 | FN | TN | TN | -                        | -      | - | adr tu                                               |
| 272 | CVS, Na-channel block                    | FN | TN | TN | -                        | li ht  | - | thyr ad; tes ad; adr bpha; adr bpha                  |
| 209 | CVS, PDE3 inhibitor                      | FN | TN | TN | li ; kid                 | -      | - | adr bpha                                             |
| 212 | GI, 5HT4 agonist                         | FN | TN | TN | -                        | -      | - | tes tu; pit ad                                       |
| 269 | GI, 5HT4-agonist                         | FN | TN | TN | -                        | -      | - | thyr ad; mam fad; pan ad; adr bpha;<br>li ad; pit ad |
| 210 | GI, Histamine H2 antagonist              | FN | TN | TN | li                       | -      | - | tes ad                                               |
| 275 | GI, Histamine H2 antagonist              | FN | TN | TN | -                        | -      | - | skin fibr                                            |
| 194 | MB, antidiabetic, alfa-glucosidase inhib | FN | TN | TN | -                        | -      | - | tes ad; kid ad; kid ac;                              |
| 195 | RS, Histamine H1 antagonist              | FN | TN | TN | li ; kid                 | -      | - | adr bpha                                             |
| 207 | RS, Histamine H1 antagonist              | FN | TN | TN | -                        | li ht  | - | thyr ad; pit ac; li ac                               |
| 264 | RS, remaining, Methylxanthine-derivate   | FN | TN | TN | li                       | -      | - | tes tu; mam fad                                      |
| 268 | UB, Anticholinergic                      | FN | TN | TN | -                        | li ht  | - | ut polyp; kid pap                                    |

|     |                                       |    |    |    |                 |                |          |          |
|-----|---------------------------------------|----|----|----|-----------------|----------------|----------|----------|
| 283 | UB, Anticholinergic                   | FN | TN | TN | -               | -              | -        | kid sar  |
| 287 | UB, Anticholinergic                   | FN | TN | TN | -               | -              | -        | skin sar |
| 157 | CNS, SSRI                             | FP | TN | TN | -               | li ht          | li hp    | -        |
| 159 | CVS, Alpha1 agonist                   | FP | TN | TN | -               | -              | mam hp   | -        |
| 145 | CVS, Alpha2 agonist                   | FP | TN | TN | -               | -              | thy hp   | -        |
| 149 | CVS, Alpha2 agonist                   | FP | TN | TN | -               | -              | islet hp | -        |
| 156 | CVS, Angiotensin II antagonist        | FP | TN | TN | -               | -              | kid hp   | -        |
| 162 | CVS, Angiotensin II antagonist        | FP | TN | TN | -               | kid ht         | kid hp   | -        |
| 147 | CVS, Beta antagonist                  | FP | TN | TN | -               | adr ht         | thyr hp  | -        |
| 148 | CVS, Beta antagonist /alpha-1 blocker | FP | TN | TN | li              | -              | li hp    | -        |
| 154 | RS, Histamine H1 antagonist           | FP | TN | TN | -               | -              | mam hp   | -        |
| 155 | RS, Histamine H1 antagonist           | FP | TN | TN | li              | li ht          | pan hp   | -        |
| 108 | AI, COX2 inhibitor                    | TN | TN | TN | -               | -              | -        | -        |
| 72  | AI, COX2-inhibitor                    | TN | TN | TN | -               | -              | -        | -        |
| 44  | AI, NSAID                             | TN | TN | TN | kid             | -              | -        | -        |
| 45  | AI, NSAID                             | TN | TN | TN | -               | -              | -        | -        |
| 50  | AI, NSAID                             | TN | TN | TN | kid ; spl       | -              | -        | -        |
| 64  | AI, NSAID                             | TN | TN | TN | -               | -              | -        | -        |
| 74  | AI, NSAID                             | TN | TN | TN | -               | -              | -        | -        |
| 83  | AI, NSAID                             | TN | TN | TN | li ; kid        | -              | -        | -        |
| 91  | AI, NSAID                             | TN | TN | TN | hrt ; adr ; kid | -              | -        | -        |
| 124 | AI, NSAID                             | TN | TN | TN | -               | -              | -        | -        |
| 129 | AI, NSAID                             | TN | TN | TN | -               | -              | -        | -        |
| 71  | AI, NSAID,                            | TN | TN | TN | -               | -              | -        | -        |
| 3   | BM, bisphosphonate                    | TN | TN | TN | -               | -              | -        | -        |
| 33  | BM, bisphosphonate                    | TN | TN | TN | -               | -              | -        | -        |
| 87  | BM, Bisphosphonate,                   | TN | TN | TN | thyr ; parath   | bo ht          | -        | -        |
| 4   | CNS, 5-HT1b/d agonist                 | TN | TN | TN | -               | thyr ht; li ht | -        | -        |

|     |                                          |    |    |    |                                     |        |   |   |
|-----|------------------------------------------|----|----|----|-------------------------------------|--------|---|---|
| 107 | CNS, 5-HT1b/d agonist,                   | TN | TN | TN | -                                   | -      | - | - |
| 95  | CNS, 5-HT3 antagonist                    | TN | TN | TN | -                                   | -      | - | - |
| 24  | CNS, antiepileptic, Na-channel blocker   | TN | TN | TN | -                                   | li ht  | - | - |
| 49  | CNS, antiepileptic, Na-channel blocker   | TN | TN | TN | -                                   | -      | - | - |
| 65  | CNS, antiepileptic, Na-channel blocker   | TN | TN | TN | -                                   | li ht  | - | - |
| 66  | CNS, antiepileptic, Na-channel blocker   | TN | TN | TN | -                                   | li ht  | - | - |
| 5   | CNS, Benzodiazepine                      | TN | TN | TN | -                                   | -      | - | - |
| 142 | CNS, benzodiazepine-like hypnotic        | TN | TN | TN | -                                   | -      | - | - |
| 143 | CNS, benzodiazepine-like hypnotic        | TN | TN | TN | spl ; li ; kid ;<br>tes ; hrt ; pit | li ht  | - | - |
| 84  | CNS, Opioid, mu-agonist                  | TN | TN | TN | -                                   | -      | - | - |
| 132 | CNS, Opioid, mu-agonist, anticholinergic | TN | TN | TN | -                                   | -      | - | - |
| 85  | CNS, Opioid, mu-antagonist               | TN | TN | TN | -                                   | -      | - | - |
| 86  | CNS, Opioid, mu-antagonist               | TN | TN | TN | -                                   | -      | - | - |
| 103 | CNS, SNRI                                | TN | TN | TN | -                                   | -      | - | - |
| 137 | CNS, SNRI                                | TN | TN | TN | -                                   | -      | - | - |
| 29  | CNS, SSRI                                | TN | TN | TN | -                                   | -      | - | - |
| 54  | CNS, SSRI                                | TN | TN | TN | -                                   | -      | - | - |
| 112 | CNS, SSRI                                | TN | TN | TN | kid                                 | li ht  | - | - |
| 88  | CNS, SSRI, 5-HT antagonist               | TN | TN | TN | -                                   | -      | - | - |
| 15  | CVS, ACE inhibitor                       | TN | TN | TN | -                                   | -      | - | - |
| 69  | CVS, ACE inhibitor                       | TN | TN | TN | -                                   | -      | - | - |
| 117 | CVS, ACE inhibitor                       | TN | TN | TN | kid                                 | kid ht | - | - |
| 13  | CVS, Angiotensin II antagonist           | TN | TN | TN | -                                   | -      | - | - |
| 23  | CVS, Angiotensin II antagonist           | TN | TN | TN | -                                   | kid ht | - | - |
| 40  | CVS, Angiotensin II antagonist           | TN | TN | TN | -                                   | -      | - | - |
| 10  | CVS, anticoagulant                       | TN | TN | TN | -                                   | -      | - | - |
| 14  | CVS, Beta antagonist                     | TN | TN | TN | -                                   | -      | - | - |
| 16  | CVS, Beta antagonist                     | TN | TN | TN | -                                   | -      | - | - |

|     |                              |    |    |    |                                                         |                                     |                   |   |
|-----|------------------------------|----|----|----|---------------------------------------------------------|-------------------------------------|-------------------|---|
| 17  | CVS, Beta antagonist         | TN | TN | TN | hrt ; li                                                | -                                   | -                 | - |
| 25  | CVS, Beta antagonist         | TN | TN | TN | pit ; lu ; hrt ;<br>spl ; kid ; adr ;<br>tes ; ova ; br | -                                   | -                 | - |
| 26  | CVS, Beta antagonist         | TN | TN | TN | -                                                       | -                                   | -                 | - |
| 126 | CVS, Beta antagonist         | TN | TN | TN | -                                                       | -                                   | -                 | - |
| 127 | CVS, Beta antagonist         | TN | TN | TN | -                                                       | -                                   | -                 | - |
| 9   | CVS, Calcium antagonist      | TN | TN | TN | hrt ; kid                                               | adr ht                              | -                 | - |
| 90  | CVS, Calcium antagonist      | TN | TN | TN | spl ; kid ; ova<br>; hrt ; li ; adr ;<br>br             | -                                   | -                 | - |
| 92  | CVS, Calcium antagonist      | TN | TN | TN | -                                                       | -                                   | -                 | - |
| 93  | CVS, Calcium antagonist      | TN | TN | TN | -                                                       | -                                   | -                 | - |
| 38  | CVS, class 1C antiarrhythmic | TN | TN | TN | thyr ; li                                               | -                                   | -                 | - |
| 53  | CVS, class 1C antiarrhythmic | TN | TN | TN | hrt ; li                                                | -                                   | -                 | - |
| 6   | CVS, endothelin antagonist   | TN | TN | TN | -                                                       | li ht; int ht;<br>adr ht; mam<br>ht | nose hp; bm<br>hp | - |
| 115 | CVS, endothelin antagonist   | TN | TN | TN | -                                                       | -                                   | -                 | - |
| 105 | CVS, Imidazoline agonist     | TN | TN | TN | adr ; tes                                               | -                                   | -                 | - |
| 100 | CVS, Na-channel block        | TN | TN | TN | -                                                       | -                                   | -                 | - |
| 101 | CVS, Na-channel block        | TN | TN | TN | -                                                       | li ht                               | -                 | - |
| 77  | CVS, PDE3 inhibitor          | TN | TN | TN | adr                                                     | -                                   | -                 | - |
| 110 | CVS, vasopressin-2 agonist   | TN | TN | TN | -                                                       | -                                   | -                 | - |
| 131 | CVS, vasopressin-2 agonist   | TN | TN | TN | -                                                       | -                                   | -                 | - |
| 121 | GI, 5HT4-agonist             | TN | TN | TN | -                                                       | -                                   | -                 | - |
| 48  | GI, Histamine H2 antagonist  | TN | TN | TN | br ; hrt ; kid ;<br>tes ; li ; ova                      | -                                   | -                 | - |
| 94  | GI, Histamine H2 antagonist  | TN | TN | TN | li ; kid                                                | -                                   | -                 | - |

|     |                                          |    |    |    |                              |                |                                   |                                |
|-----|------------------------------------------|----|----|----|------------------------------|----------------|-----------------------------------|--------------------------------|
| 76  | MB, antidiabetic, alfa-glucosidase inhib | TN | TN | TN | -                            | -              | -                                 | -                              |
| 68  | MB, antidiabetic, DPP4 inhibitor         | TN | TN | TN | -                            | thyr ht; li ht | -                                 | -                              |
| 111 | MB, antidiabetic, DPP4 inhibitor         | TN | TN | TN | -                            | -              | -                                 | -                              |
| 114 | MB, antidiabetic, DPP4 inhibitor         | TN | TN | TN | -                            | -              | -                                 | -                              |
| 139 | MB, antidiabetic, DPP4 inhibitor         | TN | TN | TN | -                            | -              | -                                 | -                              |
| 61  | RS, Anticholinergic                      | TN | TN | TN | -                            | -              | -                                 | -                              |
| 128 | RS, Anticholinergic                      | TN | TN | TN | -                            | -              | -                                 | -                              |
| 11  | RS, Histamine H1 antagonist              | TN | TN | TN | -                            | -              | -                                 | -                              |
| 12  | RS, Histamine H1 antagonist              | TN | TN | TN | li ; lu ; hrt ;<br>kid ; tes | li ht          | -                                 | -                              |
| 67  | RS, HistamineH1 antagonist               | TN | TN | TN | -                            | li ht          | -                                 | -                              |
| 82  | RS, remaining, Leukotriene receptor a    | TN | TN | TN | -                            | -              | -                                 | -                              |
| 116 | RS, remaining, Mest cell stabilisor      | TN | TN | TN | -                            | -              | -                                 | -                              |
| 51  | UB, Anticholinergic                      | TN | TN | TN | -                            | -              | pit ad; br ac;<br>mes lip; pit ac | -                              |
| 125 | UB, Anticholinergic and calcium antagoni | TN | TN | TN | thyr ; adr ;<br>ova ; li     | -              | -                                 | -                              |
| 35  | CNS, SSRI                                | TN | TN | TN | -                            | -              | -                                 | -                              |
| 37  | CVS, ACE inhibitor                       | TN | TN | TN | -                            | -              | -                                 | -                              |
| 31  | UB, Anticholinergic                      | TN | TN | TN | -                            | -              | -                                 | -                              |
| 164 | AI, NSAID                                | TP | TN | TN | -                            | -              | kid hp; UGT<br>hp                 | adr bpha                       |
| 181 | CNS, 5-HT1b/d agonist,                   | TP | TN | TN | kid                          | -              | epi hp; tes hp                    | thyr ad; pit ad; thy bthym     |
| 176 | CNS, 5-HT3 antagonist                    | TP | TN | TN | -                            | -              | -                                 | li ad; li ac                   |
| 183 | CNS, antiepileptic, Na-channel blocker   | TP | TN | TN | kid ; adr                    | li ht          | kid hp                            | li ac                          |
| 174 | CVS, ACE inhibitor                       | TP | TN | TN | thyr                         | -              | kid hp                            | pit ad; br ac; mes lip; pit ac |

|     |                                                   |    |     |    |                                       |        |                |                                                      |
|-----|---------------------------------------------------|----|-----|----|---------------------------------------|--------|----------------|------------------------------------------------------|
| 186 | CVS, ACE inhibitor                                | TP | TN  | TN | -                                     | kid ht | kid hp         | ln bhaem                                             |
| 167 | CVS, Alpha2 agonist, indicatie ocular             | TP | TN  | TN | -                                     | int ht | int hp         | pan ac; thyr ad; mam ad                              |
| 165 | CVS, Calcium antagonist                           | TP | TN  | TN | li                                    | li ht  | ln hp; thyr hp | thyr ad                                              |
| 172 | CVS, Calcium antagonist                           | TP | TN  | TN | -                                     | -      | col hp         | mam fad; adr bpha; tes ad; pit ad;<br>mam ac; pit ca |
| 234 | BM, remaining, Isoflavone                         | FN | TN* | TN | -                                     | -      | -              | pit ad; li ad                                        |
| 197 | CNS, remaining, melatonin receptor agonist        | FN | TN* | TN | -                                     | -      | -              | li ad; li ac                                         |
| 223 | CNS, remaining, NMDA-antagonist                   | FN | TN* | TN | -                                     | -      | -              | tes ad                                               |
| 261 | CNS, remaining, nootropic drug                    | FN | TN* | TN | -                                     | -      | -              | adr bpha                                             |
| 232 | CVS, remaining, D1/alpha agonist                  | FN | TN* | TN | adr ; kid                             | -      | -              | pan ad                                               |
| 216 | CVS, remaining, imidazole, PDE-inh                | FN | TN* | TN | -                                     | -      | -              | adr bpha                                             |
| 225 | CVS, remaining, Quinolone vasodila                | FN | TN* | TN | li ; thyr ; adr ;<br>spl ; pros ; tes | -      | -              | adr bpha                                             |
| 198 | CVS, remaining, renin inhibitor                   | FN | TN* | TN | -                                     | col ht | -              | col ad; col ac                                       |
| 238 | GI, remaining, Sugar alcohol                      | FN | TN* | TN | -                                     | li ht  | -              | tes tu                                               |
| 196 | ZZ, Remaining, retinoid, topical,<br>keratinocyte | FN | TN* | TN | pit ; adr                             | -      | -              | adr bpha; thyr ad                                    |
| 151 | MB, Antidiabetic, remaining, SGLT-2<br>inhibitor  | FP | TN* | TN | -                                     | kid ht | kid hp         | -                                                    |
| 160 | MB, remaining, 3 beta-hydroxysteroid de           | FP | TN* | TN | -                                     | adr ht | adr hp         | -                                                    |
| 153 | UB, remaining xanthine oxidase inhibito           | FP | TN* | TN | -                                     | -      | thyr hp        | -                                                    |
| 7   | AI, remaining,                                    | TN | TN* | TN | li;                                   | -      | -              | -                                                    |
| 122 | AI, remaining, cytokine-modulat                   | TN | TN* | TN | -                                     | -      | -              | -                                                    |
| 28  | BM, remaining, calcium-mimetic                    | TN | TN* | TN | -                                     | -      | -              | -                                                    |
| 75  | CNS, Opioid, remaining, kappa agonist             | TN | TN* | TN | -                                     | -      | -              | -                                                    |
| 22  | CNS, remaining 5HT, 5-HT1-agonist                 | TN | TN* | TN | -                                     | -      | -              | -                                                    |
| 56  | CNS, remaining, acetylcholinesterase inhib        | TN | TN* | TN | -                                     | sgl ht | -              | -                                                    |
| 96  | CNS, remaining, AMPA Glutamate<br>antagonist      | TN | TN* | TN | -                                     | -      | -              | -                                                    |
| 106 | CNS, remaining, cannabinoid antagonist            | TN | TN* | TN | -                                     | -      | -              | -                                                    |



|     |                                            |    |     |    |                                                   |                |   |   |
|-----|--------------------------------------------|----|-----|----|---------------------------------------------------|----------------|---|---|
| 20  | CNS, remaining, DA-NA uptake inhibitor     | TN | TN* | TN | li ; adr ; thyr                                   | li ht          | - | - |
| 118 | CNS, remaining, GABA-enhancer              | TN | TN* | TN | -                                                 | -              | - | - |
| 138 | CNS, remaining, GABA-metab. inhib          | TN | TN* | TN | -                                                 | -              | - | - |
| 81  | CNS, remaining, MAO-A inhibitor            | TN | TN* | TN | lu ; kid ; thyr ;<br>tes ; ova                    | -              | - | - |
| 102 | CNS, remaining, MAO-B inhibitor            | TN | TN* | TN | -                                                 | li ht          | - | - |
| 136 | CNS, Remaining, Nicotine agonist           | TN | TN* | TN | -                                                 | -              | - | - |
| 63  | CVS, remaining, 5-HT2 antagonist           | TN | TN* | TN | spl ; li ; kid ;<br>hrt ; pan ; br ;<br>thy ; adr | -              | - | - |
| 141 | CVS, remaining, B1 partial agonist         | TN | TN* | TN | -                                                 | -              | - | - |
| 36  | CVS, remaining, hemostatic                 | TN | TN* | TN | -                                                 | -              | - | - |
| 89  | CVS, remaining, Nitr/K+ATP agonist         | TN | TN* | TN | -                                                 | -              | - | - |
| 113 | CVS, remaining, PDE5-inhibitor             | TN | TN* | TN | -                                                 | li ht; thyr ht | - | - |
| 78  | CVS, remaining, vasodilator                | TN | TN* | TN | -                                                 | hrt ht         | - | - |
| 119 | GI, remaining, anti-osteoporose agent      | TN | TN* | TN | -                                                 | -              | - | - |
| 32  | GI, remaining, Fe-chelator                 | TN | TN* | TN | -                                                 | -              | - | - |
| 70  | GI, remaining, Opioid, mu-agonist          | TN | TN* | TN | -                                                 | -              | - | - |
| 30  | GI, remaining, Phosphate binder            | TN | TN* | TN | -                                                 | -              | - | - |
| 80  | GI, remaining, Synthetisch prostaglandin   | TN | TN* | TN | adr ; li                                          | -              | - | - |
| 58  | MB, Antidiabetic, remaining, SU derivative | TN | TN* | TN | -                                                 | -              | - | - |
| 130 | MB, remaining, Aldose reductase inhibit    | TN | TN* | TN | -                                                 | -              | - | - |
| 43  | MB, remaining, hypertriglyceridemia        | TN | TN* | TN | -                                                 | -              | - | - |
| 57  | MB, remaining, lipid replacement           | TN | TN* | TN | -                                                 | -              | - | - |
| 1   | MB, remaining, nicotinic acid derived,     | TN | TN* | TN | -                                                 | -              | - | - |
| 79  | UB, remaining, oral Beta 3 agonist         | TN | TN* | TN | -                                                 | li ht          | - | - |
| 62  | ZZ, remaining, CFTR potentiator            | TN | TN* | TN | -                                                 | -              | - | - |
| 39  | ZZ, Remaining, Prostaglandin E2            | TN | TN* | TN | -                                                 | -              | - | - |

|     |                                                |    |     |    |                                     |                    |               |                                                         |
|-----|------------------------------------------------|----|-----|----|-------------------------------------|--------------------|---------------|---------------------------------------------------------|
| 109 | ZZ, remaining, protein kinase C-beta inhibitor | TN | TN* | TN | -                                   | -                  | -             | -                                                       |
| 185 | CNS, 5-HT2 antagonist                          | TP | NC  | TP | li                                  | thyr ht;<br>mam ht | mam hp        | thyr ad; mam ac                                         |
| 182 | AF, conazole derivative                        | TP | NT  | TP | li ; kid ; spl ;<br>br ; ova ; thyr | -                  | thyr hp       | tes tu; br astr; skin mel; mam ac                       |
| 171 | AV, Guanosine analogue                         | TP | NT  | TP | -                                   | pit ht             | tes hp        | mam ac; skin sar                                        |
| 189 | AV, protease inhibitor                         | TP | NT  | TP | -                                   | thyr ht            | li hp; kid hp | adr bpha                                                |
| 161 | CVS, Alpha1 antagonist and 5-HT1A              | FP | TN  | TP | -                                   | -                  | bm hp         | -                                                       |
| 274 | CNS, DA2 agonist                               | FN | TP  | TP | adr                                 | li ht              | -             | tes ad; skin fibr                                       |
| 245 | CNS, DA2 agonist                               | FN | TP  | TP | -                                   | -                  | -             | tes ad; tes ca                                          |
| 265 | CNS, DA2 agonist                               | FN | TP  | TP | -                                   | -                  | -             | pit ad; ut ac                                           |
| 270 | CNS, DA2 agonist                               | FN | TP  | TP | -                                   | -                  | -             | tes ad                                                  |
| 273 | CNS, DA2-antagonist                            | FN | TP  | TP | -                                   | -                  | -             | islet ad; mam ac; pit ad                                |
| 278 | CVS, Alpha1 antagonist                         | FN | TP  | TP | br ;li ; kid ;<br>hrt               | -                  | -             | adr bpha; mam ac                                        |
| 259 | GI, Proton pump inhibitor                      | FN | TP  | TP | -                                   | stom ht            | -             | stom tu; stom SCC; li ad                                |
| 215 | HM, Dual 5 reductase inhibitor.                | FN | TP  | TP | -                                   | -                  | -             | tes ad                                                  |
| 224 | HM, Dual 5-reductase inhibitor                 | FN | TP  | TP | -                                   | -                  | -             | thyr ad                                                 |
| 221 | HM, estrogen agonist                           | FN | TP  | TP | -                                   | -                  | -             | pit ad                                                  |
| 281 | HM, estrogen agonist,                          | FN | TP  | TP | -                                   | -                  | -             | li ad; mam ca                                           |
| 254 | HM, GnRH agonist                               | FN | TP  | TP | -                                   | -                  | -             | adr bpha; adr mpha; islet ad; tes ad;<br>pit ad; pit ca |
| 286 | HM, GnRH agonist                               | FN | TP  | TP | -                                   | -                  | -             | pit ad; pit ca                                          |
| 257 | HM, progestagen-estrogen contraceptive.        | FN | TP  | TP | adr ; li                            | -                  | -             | pit ad; mam ad; mam ac                                  |
| 214 | HM, progesterone antagonist, birth cont        | FN | TP  | TP | li                                  | -                  | -             | li ad; ut ac; mam ac                                    |
| 241 | HM, remaining, aromatase inhibitor             | FN | TP  | TP | -                                   | li ht              | -             | ova gca; UGT pap                                        |
| 201 | HM, selective estrogen modulator               | FN | TP  | TP | -                                   | -                  | -             | kid ad; kid ac; ova ad                                  |
| 202 | MB, fibrate                                    | FN | TP  | TP | -                                   | -                  | -             | tes tu; adr bpha; li ac                                 |

|     |                                        |    |    |    |                               |                     |         |                                             |
|-----|----------------------------------------|----|----|----|-------------------------------|---------------------|---------|---------------------------------------------|
| 211 | MB, fibrate                            | FN | TP | TP | li ; kid ; hrt ;<br>adr ; tes | -                   | -       | pan ad; stom tu; li ad; li ac               |
| 267 | MB, HMG-CoA-reductase inhibitor        | FN | TP | TP | -                             | -                   | -       | thyr ad; li ac                              |
| 228 | RS, Beta2 agonist                      | FN | TP | TP | -                             | pan ht              | -       | thyr ad; thyr ac; ova leio; mam ac          |
| 280 | RS, Beta2 agonist                      | FN | TP | TP | -                             | -                   | -       | ova leio                                    |
| 288 | RS, Beta2 agonist                      | FN | TP | TP | lu ; hrt                      | hrt ht              | -       | ova leio; pit ad; pit ac                    |
| 199 | RS, Beta2-agonist                      | FN | TP | TP | li                            | -                   | -       | thyr ad                                     |
| 227 | RS, Corticosteroid                     | FN | TP | TP | -                             | -                   | -       | islet tu; adr bpha; skin sar                |
| 144 | CVS, Alpha1 antagonist                 | FP | TP | TP | -                             | -                   | mam hp  | -                                           |
| 150 | IS, Immunosuppressive                  | FP | TP | TP | -                             | -                   | ln hp   | -                                           |
| 152 | IS, Immunosuppressive, mTOR inhibitor  | FP | TP | TP | -                             | stom ht;<br>thyr ht | stom hp | -                                           |
| 146 | MB, HMG-CoA reductase inhibitor        | FP | TP | TP | -                             | -                   | li hp   | -                                           |
| 59  | CNS, DA2-antagonist/5HT antagonist     | TN | TP | TP | -                             | -                   | -       | -                                           |
| 19  | CVS, Alpha1 antagonist                 | TN | TP | TP | kid ; br ; tes                | -                   | -       | -                                           |
| 34  | CVS, Alpha1 antagonist                 | TN | TP | TP | -                             | -                   | -       | -                                           |
| 133 | CVS, Alpha1 antagonist                 | TN | TP | TP | -                             | -                   | -       | -                                           |
| 41  | GI, Proton pump inhibitor              | TN | TP | TP | -                             | -                   | -       | -                                           |
| 21  | HM, GnRH agonist                       | TN | TP | TP | -                             | -                   | -       | -                                           |
| 42  | HM, progestagen-estrogen contraceptive | TN | TP | TP | pit ; thyr                    | -                   | -       | -                                           |
| 120 | IS, Immunosuppressive                  | TN | TP | TP | -                             | -                   | -       | -                                           |
| 140 | IS, Immunosuppressive                  | TN | TP | TP | -                             | -                   | -       | -                                           |
| 47  | IS, Immunosuppressive, mTOR inhibitor  | TN | TP | TP | -                             | thyr ht             | -       | -                                           |
| 52  | IS, Immunosuppressive, S1P antagonist  | TN | TP | TP | -                             | -                   | -       | -                                           |
| 46  | MB, fibrate                            | TN | TP | TP | -                             | -                   | -       | -                                           |
| 27  | MB, HMG-CoA reductase inhibitor        | TN | TP | TP | -                             | -                   | -       | -                                           |
| 163 | CNS, DA2-antagonist, Benzamide,        | TP | TP | TP | -                             | -                   | mam hp  | pan ad; pan ac; adr bpha; mam ca;<br>pit ca |
| 188 | CNS, DA2-antagonist, DA3 antagonist    | TP | TP | TP | li                            | -                   | lu hp   | mam ca                                      |

|     |                                              |    |     |    |                                             |                                      |                   |                                                                 |
|-----|----------------------------------------------|----|-----|----|---------------------------------------------|--------------------------------------|-------------------|-----------------------------------------------------------------|
| 192 | CVS, Alpha1 antagonist                       | TP | TP  | TP | -                                           | li ht; vag ht                        | li hp; mam hp     | thyr ad; thyr ac                                                |
| 193 | CVS, Alpha1 antagonist                       | TP | TP  | TP | -                                           | -                                    | mam hp            | mam ad; hsyst leu                                               |
| 178 | GI, Proton pump inhibitor                    | TP | TP  | TP | li ; li ; lu ;<br>stom                      | li ht; stom<br>ht; stom ht           | stom hp           | tes ad; tes ad                                                  |
| 187 | GI, Proton pump inhibitor                    | TP | TP  | TP | li ; kid ; stom ;<br>thyr ; hrt ; spl       | li ht; stom<br>ht; thyr ht           | stom hp           | adr bpha; tes ad; stom SCP; stom<br>SCC; hsyst leu; pit ad      |
| 175 | HM, GnRH agonist                             | TP | TP  | TP | -                                           | -                                    | tes hp            | pit ad                                                          |
| 180 | HM, GnRH agonist                             | TP | TP  | TP | br                                          | pit ht                               | pit hp            | pit ad                                                          |
| 166 | HM, remaining, antiandrogen,                 | TP | TP  | TP | tes ; adr                                   | li ht; ova ht;<br>adr ht; thyr<br>ht | tes hp; ova<br>hp | te ad; thyr ad; ut ac                                           |
| 179 | HM, selective estrogen modulator             | TP | TP  | TP | -                                           | -                                    | ova hp            | kid ac; ova ad                                                  |
| 190 | MB, HMG-CoA reductase inhibitor              | TP | TP  | TP | -                                           | li ht                                | li hp; stom hp    | ut polyp                                                        |
| 173 | MB, HMG-CoA-reductase inhibitor              | TP | TP  | TP | thyr                                        | -                                    | stom hp           | stom SCP; thyr ac; thyr ad                                      |
| 191 | RS, Beta2 agonist                            | TP | TP  | TP | -                                           | -                                    | nose hp           | ova leio; pit ad                                                |
| 168 | RS, Corticosteroid                           | TP | TP  | TP | -                                           | -                                    | mam hp            | mam fad; li ac; br astr; li ad                                  |
| 170 | RS, Corticosteroid                           | TP | TP  | TP | many; tes ; br<br>; hrt ; kid ; pit<br>; li | li ht                                | pan hp; ln hp     | pan ad; pan ac; bo most; li ad; li ac; li<br>ac; mam ad; mam ac |
| 213 | CNS, remaining, Carbonic anhydrase inhibitor | FN | TP* | TP | -                                           | -                                    | -                 | UGT pap                                                         |
| 258 | MB, remaining, Inhib.growth hormone          | FN | TP* | TP | -                                           | -                                    | -                 | sk sar; ut ac                                                   |
| 134 | MB, antidiabetic, remaining, PPAR-gamma      | TN | TP* | TP | hrt ; li                                    | li ht                                | -                 | -                                                               |
| 177 | CNS, remaining, Electron transporter         | TP | TP* | TP | -                                           | -                                    | stom hp           | Squamous cell and basal carcinomas                              |
| 169 | CVS, remaining, Hydrazinophthalzine          | TP | TP* | TP | -                                           | pit ht                               | thyr hp;          | thyr ad; thyr ac                                                |
